# Supplementary material for: A supervised machine-learning approach for the efficient development of a multi method (LC-MS) for a large number of drugs and subsets thereof: focus on oral antitumor agents
Source: publisher site journal article supplement (doi:10.1515/cclm-2023-0468), 2023-08-22
Supplement: Supplementary file 1 [file j_cclm_2023-0468_suppl_001.docx]

**Supplementary Information, Tables and Figures**

**A supervised machine-learning approach for the efficient development of a multi method (LC-MS) for a large number of drugs and subsets thereof: focus on oral antitumor agents**

Niklas Kehla, Arne Gessnera, Renke Maasa,b, Martin F. Fromma,b, R. Verena Taudtea,c,*

a Institute of Experimental and Clinical Pharmacology and Toxicology, Friedrich-Alexander-Universität Erlangen-Nürnberg (FAU), 91054 Erlangen, Germany

b FAU NeW - Research Center for New Bioactive Compounds, Friedrich-Alexander-Universität Erlangen-Nürnberg (FAU), 91054 Erlangen, Germany

c Core Facility for Metabolomics, Department of Medicine, Philipps-Universität Marburg, 35043 Marburg, Germany

*corresponding author: R. Verena Taudte (Prof. Dr.rer.nat.)

Present address: Core Facility for Metabolomics, Department of Medicine, Philipps-Universität Marburg, Baldingerstrasse, 35043 Marburg, Germany

Email: [verena.taudte@uni-marburg.de](mailto:verena.taudte@uni-marburg.de)

Telephone: +49 6421/ 58-66953

**Supplementary Information**

1. **Sample Preparation**

For each compound and internal standard (IS), stock solutions were prepared at a concentration of 1 mg/mL in different solvents (dimethyl sulfoxide (DMSO), acetonitrile (ACN), methanol (MeOH)) according to their solubility, except for bicalutamide and vismodegib, which had a concentration of 5 mg/mL (Supplementary Table 1). Stock solutions were stored at -80 °C in glass vials. All stock solutions were combined and diluted with ACN to obtain a standard solution with a concentration of 200% of the respective mean trough levels (cmin) of all individual analytes. Eight individual working standards were prepared by successive dilution of this standard solution with concentrations ranging from 10 to 200% cmin (see Supplementary Table 2). In order to extract the analytes and precipitate proteins, aliquots of each IS were combined and diluted with ACN to obtain a final solution with a concentration of 50 ng/mL for all IS. Individual standards for calibration and validation were prepared by spiking pooled human plasma (50 μL) with 10 μL of the respective working solution. The mixtures were then centrifuged for 10 min at 16,220 rpm and 4 °C in an Eppendorf Centrifuge 5427R (Eppendorf, Hamburg, Germany). Finally, 100 μL of supernatant were transferred to 300 μL HPLC insert glass vials and diluted with 100 μL initial eluent (90% A/ 10% B). Blank samples were prepared as described above, except that 10 μL of ACN was added instead of the working solution. Calibration and validation standards were freshly prepared before every run.

1. **Validation**
   - 1. Calibration Curves, Linearity, and Sensitivity

For all analytes, eight-point calibration curves between lowest limit of validation (LLOV) and upper limit of validation (ULOV) were generated using four replicates of each point to assess whether the correlation coefficient (R2) was persistently greater than 0.995 (weighting 1/x). To comply with the accuracy requirements of the respective agencies, a minimum of six calibration points must be within ±15% of the respective target concentrations with a maximum coefficient of variation (CV) of 15%. Sensitivity was assessed by comparing the lowest non-zero standard response of the calibration standards with the response of a blank sample (prepared with IS). If the analyte response in the blank sample was five times lower than the response in the LLOV, the acceptance criterion was fulfilled.

- - 1. Accuracy and Precision

Accuracy and precision were determined by measuring five replicates with four different concentrations of each OAD. For this, pooled human plasma samples were spiked with different working solutions to obtain four validation standards (LLOV, low limit of validation (LOV), middle of validation limit (MOV), ULOV). Five replicates were analysed on one day for intraday accuracy and precision. For interday accuracy and precision assessment, five replicates of each validation standard were analysed on five different days. Limits of accuracy and precision are 85-115% and ≤15% for the CV, except for the LLOV, which are 80-120% and ≤20%, respectively.

- - 1. Stability

For assessment of freeze-thaw stability, four validation standards were prepared, stored at -80 °C and thawed at 4 °C three times. Samples were frozen for a further 24 h between cycles after thawing. Bench top stability in ambient conditions with or without light was analysed after 24 hours. Storage stability at 4 °C was tested by refrigerating four validation standards at 4 °C for 24 hours and 6 weeks. Autosampler stability was evaluated by measuring the ready-to-inject samples after 24 and 72 hours of storage in the autosampler at 4 °C. Long-term stability was assessed after storage of four validation standards at ‑20 °C and -80 °C for 1 month. In accordance with the requirements of the respective agencies, stability was accepted if measured values were within the respective concentration range i.e., ≤15% for LOV, MOV and ULOV and ≤20% for LLOV, based on their nominal concentration. For every stability analysis, the four validation standards were prepared in triplicate.

- - 1. Recovery and Matrix Effect

Recovery was evaluated by spiking pooled human plasma before and after plasma precipitation with four different working solutions. Recovery was defined as the ratio of signal intensity before extraction to that after extraction. Recovery was defined as the ratio of signal intensity pre-extraction to signal intensity post-extraction. Matrix effect was investigated by spiking working solutions in water instead of pooled human plasma. The ratio between the analyte responses to addition after extraction in pooled human plasma and in water provided information regarding the extent of matrix effects.

- - 1. Selectivity

Selectivity was investigated by measuring six plasma samples from healthy volunteers. Requirements were met if the samples had no interfering signals with a response ≥20% of that of the LLOV and ≥5% of that of the IS.

- - 1. Carryover

Carryover was assessed by injecting two blank samples (without IS) directly after ULOV measurement. Measured values were accepted if the signal intensities were less than 20% of the peak areas of an LLOV reference and less than 5% of IS, respectively.

- - 1. Dilution Integrity

Dilution integrity was assessed by spiking the 2-fold higher concentration than ULOV in pooled human plasma then diluting this sample 4-fold with pooled human plasma.

1. **Validation Results**
2. Calibration Curves, Linearity, Carryover, Selectivity, and Sensitivity

All 73 OADs and five active metabolites fulfilled the EMA and FDA acceptance criteria as specified in section 3.2. (EMA) and VII. (FDA), respectively [1, 2]. The correlation coefficients (R2) of the respective calibration curves were consistently above 0.995 for all analytes. Only five analytes showed carryover ranging from 0.60% (bosutinib) to 7.21% (dasatinib). Selectivity investigations indicated no interfering signals of six blank plasma samples from healthy individuals were ≥20% of the LLOV and ≥5% of the IS, respectively. Sensitivity investigations showed signals in blank plasma samples for eight analytes with values ranging between 0.07% (fedratinib) and 17.92% (entrectinib). Detailed results are shown in Supplementary Tables 1 and 6.

1. Accuracy and Precision

Acceptance criteria were fulfilled for all 78 compounds using 8-point calibration curves. Intraday and interday accuracy and precision for four concentration levels (LLOV, LOV, MOV, ULOV) are shown in Supplementary Table 6. Values at the LLOV of intraday accuracy varied from 85.44% (vismodegib) to 114.93% (bosutinib) with CVs ranging from 1.65% (ceritinib) - 14.37% (afatinib). Accuracies of the other three concentration levels were between 86.39% (lenalidomide) and 114.79% (bosutinib). At the LLOV, interday accuracies ranged from 85.63% (bicalutamide) to 111.88% (rucaparib) and for the other three concentration levels from 86.16% (lenalidomide) to 109.03% (bicalutamide) with CVs of ≤5.88%. Thus, all validation standards fulfilled the acceptance criteria for intra- and interday accuracy and precision.

1. Recovery and Matrix Effect

Lowest mean recovery was found for lenalidomide with a percentage of 82.76%. Highest mean recovery was found for axitinib with 119.12%. A large number of analytes showed ion enhancement effects with values ranging from 0.05% (dabrafenib) to 1,386.38% (abemaciclib) in accordance to our previously published method [3]. Twenty-seven analytes showed ion suppression with the lowest percentage of -0.22% (selpercatinib) and the highest percentage of -14.39% (vinorelbine). Detailed results of recovery and matrix effect investigations are shown in Supplementary Table 6.

1. Stability

Detailed results of short-term and long-term stability investigations are shown in Supplementary Table 7. All analytes fulfilled the acceptance criteria after three freeze-thaw cycles, except for the LLOVs of dacomitinib, neratinib, and trifluridine and all QCs of thalidomide. After short-term stability investigations, 59 analytes fulfilled the acceptance criteria, 9 had minor stability issues in the low-concentration QCs, and 10 had more notable stability issues in all QCs. When stored at 4 °C for 24 hours, all analytes fulfilled the acceptance criteria, except for thalidomide. A total of 61 analytes were stable after 1 week at 4 °C. During autosampler storage investigations for 24 h and 72 h, 8 analytes showed minor issues in the low QCs. Only regorafenib did not fullfil the acceptance critera after 72 h. All analytes were stable after one month at -20 or ‑80 °C, except gilteritinib, neratinib, and thalidomide. 40 analytes had minor deviations at low-concentration QCs only. A stability evaluation has already been done in our previous work [3]. Additional stability problems were observed with regorafenib and thalidomide, which is consistent with published data [3-5]. However, neratinib and gilteritinib also experienced stability problems, which is not consistent with previous publications [6, 7]. These results highlight the need to store the samples at -80 °C and that storage time should be kept to a minimum.

1. Dilution integrity

A total of 72 analytes at a two-fold higher concentration than ULOV showed accuracies between 85.06% (ribociclib) - 108.53% (dabrafenib) fulfilling the acceptance criteria. At concentration levels above ULOV, only fedratinib, gilteritinib, imatinib, osimertinib, vandetanib, and vinorelbine did not meet the acceptance criteria. Dilution into the validated range was successful for all analytes with accuracies ranging from 85.39% (bosutinib) - 112.73% (trifluridine). More detailed results of the dilution integrity investigation are listed in Supplementary Table 6. This result shows that for all OADs, measurement with concentrations up to 400% cmin is possible after adequate dilution into the calibrated range.

| **Supplementary Tables** | | | | | | | | | | | | | | |
| --- | --- | --- | --- | --- | --- | --- | --- | --- | --- | --- | --- | --- | --- | --- |
| **Supplementary Table 1.** Summary of all oral antitumor drug and active metabolite characteristics, corresponding cmin#-values and LC-MS settings. Bold and italicized compounds were added in comparison to our recently published method [3]. | | | | | | | | | | | | | | |
| **Oral antitumor drug** | **Structural formula** | **cmin [ng/mL]** | **Monoisotopic mass [Da]** | **Detected ion [m/z]** | **Detected species** | **Theoretical detected ion [Da]** | **Deviation [ppm]** | **Fragment**  **[m/z]** | **Validated range [ng/mL]** | **Correlation coefficient [R2]** | **Retention time [min]** | **Dissolved in** | **Purchased from** | **Regression equation for training gradients** |
| Abemaciclib | C27H32F2N8 | 181 [8, 9] | 506.2718 | 507.2791 | + H | 507.2791 | 0.00 | 393.3 | 20-400 | 0.9991 | 7.33 | DMSO | Absource (Munich, Germany) | y = 16.758x-0.513 |
| Abiraterone | C24H31NO | 9.3 [9, 10] | 349.2406 | 350.2478 | + H | 350.2478 | 0.00 | n/d | 1-20 | 0.9998 | 13.63 | DMSO | Absource (Munich, Germany) | y = 41.019x-0.687 |
| Afatinib | C24H25ClFN5O3 | 14.4 [9, 11, 12] | 485.1630 | 486.1703 | + H | 486.1703 | -0.02 | 371.1 | 1.5-30 | 0.9997 | 6.80 | DMSO | LC Laboratories (Woburn, USA) | y = 14.475x-0.471 |
| Alectinib | C30H34N4O2 | 572 [9, 12, 13] | 482.2682 | 483.2755 | + H | 483.2755 | -0.02 | 396.2 | 60-1200 | 0.9995 | 10.36 | DMSO | LC Laboratories (Woburn, USA) | y = 31.748x-0.691 |
| Anagrelide | C10H7Cl2N3O | 0.7* [14] | 254.9966 | 256.0039 | + H | 256.0039 | -0.04 | n/d | 0.75-15 | 0.9986 | 8.42 | DMSO | Absource (Munich, Germany) | y = 17.419x-0.456 |
| ***Anastrazole*** | C17H19N5 | 33.2 [9, 15] | 293.1640 | 294.1713 | + H | 294.1713 | -0.03 | 225.2 | 3.5-70 | 0.9995 | 8.59 | DMSO | MedChemTronica (Sollentuna, Sweden) | y = 21.095x-0.556 |
| Apalutamide | C21H15F4N5O2S | 3700 [9, 16] | 477.0883 | 478.0955 | + H | 478.0955 | -0.02 | 450.1 | 375-7500 | 0.9999 | 12.21 | DMSO | Absource (Munich, Germany) | y = 37.759x-0.697 |
| Axitinib | C22H18N4OS | 5 [9, 12, 17] | 386.1201 | 387.1274 | + H | 387.1274 | 0.00 | 356.3 | 0.5-10 | 0.9978 | 8.88 | MeOH | Merck (Darmstadt, Germany) | y = 22.722x-0.582 |
| ***Bicalutamide*** | C18H14F4N2O4S | 8850 [9, 18] | 430.0610 | 453.0503 | + Na | 431.0683 | 0.00 | 195.1 | 1000-20000 | 0.9962 | 11.50 | DMSO | MedChemTronica (Sollentuna, Sweden) | y = 34.268x-0.675 |
| Binimetinib | C17H15BrF2N4O3 | 53.3 [9, 19] | 440.0296 | 441.0368 | + H | 441.0368 | 0.00 | 379.0 | 5-100 | 0.9993 | 9.69 | DMSO | LC Laboratories (Woburn, USA) | y = 24.423x-0.574 |
| Bosutinib | C26H29Cl2N5O3 | 147 [9, 12, 20] | 529.1647 | 530.1720 | + H | 530.1720 | -0.02 | 141.1 | 15-300 | 0.9980 | 8.34 | DMSO/ACN/  MeOH (1:1:1) | LC Laboratories (Woburn, USA) | y = 20.7x-0.564 |
| Brigatinib | C29H39ClN7O2P | 520 [9, 21] | 583.2591 | 584.2664 | + H | 584.2664 | -0.02 | 484.2 | 55-1100 | 0.9990 | 6.48 | DMSO | LC Laboratories (Woburn, USA) | y = 14.02x-0.48 |
| Cabozantinib | C28H24FN3O5 | 1380 [9, 12, 22] | 501.1700 | 502.1773 | + H | 502.1773 | 0.00 | 323.1 | 150-3000 | 0.9994 | 11.06 | DMSO | LC Laboratories (Woburn, USA) | y = 34.991x-0.711 |
| Ceritinib | C28H36ClN5O3S | 871 [9, 12, 23] | 557.2227 | 558.2300 | + H | 558.2300 | -0.02 | 516.2 | 90-1800 | 0.9998 | 12.47 | DMSO | LC Laboratories (Woburn, USA) | y = 41.379x-0.741 |
| Cobimetinib | C21H21F3IN3O2 | 127 [9, 12, 24] | 531.0631 | 532.0703 | + H | 532.0703 | -0.02 | 249.0 | 12.5-250 | 0.9997 | 11.11 | DMSO | LC Laboratories (Woburn, USA) | y = 33.28x-0.679 |
| Crizotinib | C21H22Cl2FN5O | 274 [9, 12, 25] | 449.1185 | 450.1258 | + H | 450.1258 | 0.00 | 260.2 | 25-500 | 0.9984 | 6.85 | MeOH | Merck (Darmstadt, Germany) | y = 15.655x-0.512 |
| Dabrafenib | C23H20F3N5O2S2 | 46.6 [9, 12, 26] | 519.1011 | 520.1083 | + H | 520.1083 | 0.00 | 307.1 | 5-100 | 0.9997 | 12.95 | DMSO | LC Laboratories (Woburn, USA) | y = 42.108x-0.729 |
| Dacomitinib | C24H25ClFN5O2 | 73.1 [9, 27] | 469.1681 | 470.1754 | + H | 470.1754 | 0.00 | 319.1 | 400-8000 | 0.9995 | 7.15 | MeOH | Biomol (Hamburg, Germany) | y = 16.473x-0.517 |
| ***Darolutamide*** | C19H19ClN6O2 | 3780 [9, 28] | 398.1258 | 399.1331 | + H | 399.1331 | 0.00 | 178.1 | 7.5-150 | 0.9999 | 10.66 | DMSO | MedChemTronica (Sollentuna, Sweden) | y = 30.759x-0.654 |
| Dasatinib | C22H26ClN7O2S | 2.61 [9, 12, 29] | 487.1557 | 488.1630 | + H | 488.1630 | 0.00 | 401.1 | 1-20 | 0.9992 | 8.50 | DMSO | LC Laboratories (Woburn, USA) | y = 21.896x-0.585 |
| ***Duvelisib*** | C22H17ClN6O | 750* [30] | 416.1152 | 417.1225 | + H | 417.1225 | -0.02 | 282.1 | 75-1500 | 0.9995 | 9.82 | DMSO | LC Laboratories (Woburn, USA) | y = 25.09x-0.583 |
| Encorafenib | C22H27ClFN7O4S | 23 [9, 31] | 539.1518 | 540.1591 | + H | 540.1591 | 0.00 | 508.1 | 2.5-50 | 0.9976 | 11.00 | MeOH | Biomol (Hamburg, Germany) | y = 32.782x-0.677 |
| ***Endoxifen*** | C25H27NO2 | 9.72 [9, 32] | 373.2042 | 374.2115 | + H | 374.2115 | 0.00 | 58.1 | 5-100 | 0.9995 | 10.70 | DMSO | MedChemTronica (Sollentuna, Sweden) | y = 37.748x-0.724 |
| ***Entrectinib*** | C31H34F2N6O2 | 850 [9, 33] | 560.2711 | 561.2784 | + H | 561.2784 | 0.00 | 302.2 | 125-2500 | 0.9975 | 11.09 | DMSO | MedChemTronica (Sollentuna, Sweden) | y = 35.18x-0.713 |
| Enzalutamide | C21H16F4N4O2S | 11400 [9, 34] | 464.0930 | 465.1003 | + H | 465.1003 | 0.00 | 209.1 | 1125-22500 | 0.9997 | 11.88 | DMSO | Absource (Munich, Germany) | y = 36.835x-0.699 |
| Erlotinib | C22H23N3O4 | 1011 [9, 12, 35] | 393.1689 | 394.1761 | + H | 394.1761 | -0.03 | 278.1 | 100-2000 | 0.9996 | 8.87 | DMSO | LC Laboratories (Woburn, USA) | y = 24.04x-0.615 |
| ***Fedratinib*** | C27H36N6O3S | 900 [36] | 524.2570 | 525.2642 | + H | 525.2642 | 0.00 | 98.1 | 90-1800 | 0.9985 | 6.26 | DMSO | MedChemTronica (Sollentuna, Sweden) | y = 14.362x-0.511 |
| Gefitinib | C22H24ClFN4O3 | 291 [9, 12, 37] | 446.1521 | 447.1594 | + H | 447.1594 | -0.02 | 128.1 | 30-600 | 0.9993 | 5.83 | DMSO | Merck (Darmstadt, Germany) | y = 10.554x-0.38 |
| ***Gilteritinib*** | C29H44N8O3 | 456 [9, 38] | 552.3536 | 553.3609 | + H | 553.3609 | -0.02 | 453.3 | 50-1000 | 0.9995 | 6.97 | DMSO | MedChemTronica (Sollentuna, Sweden) | y = 16.839x-0.543 |
| ***Glasgedib*** | C21H22N6O | 365 [9, 39] | 374.1855 | 375.1928 | + H | 375.1928 | 0.00 | 96.1 | 40-800 | 0.9997 | 7.64 | DMSO | MedChemTronica (Sollentuna, Sweden) | y = 17.874x-0.527 |
| ***Hydroxy-dabrafenib*** | C23H20F3N5O3S2 | 49.8** [12, 40] | 535.0960 | 536.1032 | + H | 536.1032 | -0.02 | 323.1 | 5-100 | 0.9991 | 10.73 | DMSO | Toronto Research Chemicals (North York, Canada) | y = 31.904x-0.674 |
| Ibrutinib | C25H24N6O2 | 66* [9, 12, 41] | 440.1961 | 441.2034 | + H | 441.2034 | 0.00 | 138.1 | 7.5-150 | 0.9997 | 13.42 | DMSO | LC Laboratories (Woburn, USA) | y = 43.631x-0.73 |
| Idelalisib | C22H18FN7O | 318 [9, 12, 42] | 415.1557 | 416.1630 | + H | 416.1630 | -0.02 | 176.1 | 40-800 | 0.9997 | 10.35 | DMSO | LC Laboratories (Woburn, USA) | y = 28.108x-0.62 |
| Imatinib | C29H31N7O | 1193 [9, 12, 43] | 493.2590 | 516.2482 | + H | 516.2482 | 0.00 | 217.1 | 100-2000 | 0.9987 | 7.56 | MeOH | Santa Cruz (Heidelberg, Germany) | y = 17.866x-0.533 |
| Lapatinib | C29H26ClFN4O4S | 780 [9, 12, 44] | 580.1347 | 581.1420 | + H | 581.1420 | 0.00 | 365.1 | 80-1600 | 0.9989 | 10.64 | DMSO | LC Laboratories (Woburn, USA) | y = 31.661x-0.677 |
| Larotrectinib | C21H22F2N6O2 | 5.14 [9, 45] | 428.1772 | 429.1845 | + H | 429.1845 | 0.00 | 342.1 | 2.5-50 | 0.9995 | 10.15 | MeOH | Biomol (Hamburg, Germany) | y = 28.138x-0.631 |
| Lenalidomide | C13H13N3O3 | 13 [46] | 259.0957 | 260.1030 | + H | 260.1030 | 0.00 | 133.1 | 1.5-30 | 0.9997 | 1.84 | DMSO | Merck (Darmstadt, Germany) | y = -0.0924x + 1.836 |
| Lenvatinib | C21H19ClN4O4 | 51.5 [9, 12, 47] | 426.1095 | 427.1168 | + H | 427.1168 | 0.00 | 370.1 | 5-100 | 0.9994 | 7.16 | DMSO | LC Laboratories (Woburn, USA) | y = 16.16x-0.503 |
| ***Letrozole*** | C17H11N5 | 88.4 [9, 48] | 285.1014 | 286.1087 | + H | 286.1087 | -0.03 | 217.1 | 10-200 | 0.9999 | 8.40 | DMSO | MedChemTronica (Sollentuna, Sweden) | y = 19.412x-0.52 |
| Lorlatinib | C21H19FN6O2 | 150 [9, 49] | 406.1554 | 407.1626 | + H | 407.1626 | 0.00 | 228.1 | 15-300 | 0.9994 | 6.82 | MeOH | Biomol (Hamburg, Germany) | y = 14.208x-0.456 |
| Midostaurin | C35H30N4O4 | 1122.8 [9, 50] | 570.2267 | 571.2340 | + H | 571.2340 | 0.02 | 348.1 | 100-2000 | 0.9987 | 14.95 | DMSO | Absource (Munich, Germany) | y = 52.228x-0.775 |
| ***N-desmethyl enzalutamide*** | C20H14F4N4O2S | 8800 [51] | 450.0774 | 451.0846 | + H | 451.0846 | 0.00 | 195.1 | 800-16000 | 0.9999 | 11.41 | DMSO | MedChemTronica (Sollentuna, Sweden) | y = 34.295x-0.68 |
| Neratinib | C30H29ClN6O3 | 52.6 [52] | 556.1990 | 557.2062 | + H | 557.2062 | -0.02 | 112.1 | 11-110 | 0.9988 | 8.08 | DMSO | LC Laboratories (Woburn, USA) | y = 20.775x-0.584 |
| Nilotinib | C28H22F3N7O | 1165 [9, 12, 53] | 529.1838 | 530.1911 | + H | 530.1911 | 0.00 | 307.1 | 120-2400 | 0.9997 | 10.84 | MeOH:H2O (4:1) | LC Laboratories (Woburn, USA) | y = 32.533x-0.681 |
| Nintedanib | C31H33N5O4 | 13.1 [9, 12, 54] | 539.2533 | 540.2605 | + H | 540.2605 | 0.00 | 113.1 | 1.5-30 | 0.9993 | 10.80 | DMSO | LC Laboratories (Woburn, USA) | y = 34.343x-0.714 |
| Niraparib | C19H20N4O | 649 [9, 55] | 320.1637 | 321.1710 | + H | 321.1710 | 0.00 | 205.1 | 65-1300 | 0.9998 | 6.89 | DMSO | LC Laboratories (Woburn, USA) | y = 15.557x-0.504 |
| ***N-oxid sorafenib*** | C21H16ClF3N4O4 | 492.6 [56] | 480.0812 | 481.0885 | + H | 481.0885 | -0.02 | 308.1 | 80-1600 | 0.9998 | 13.90 | DMSO | Clearsynth (Mumbai, India) | y = 46.882x-0.751 |
| Olaparib | C24H23FN4O3 | 1570 [9, 57] | 434.1754 | 435.1827 | + H | 435.1827 | 0.00 | 281.1 | 150-3000 | 0.9998 | 9.30 | DMSO | LC Laboratories (Woburn, USA) | y = 25.545x-0.622 |
| Osimertinib | C28H33N7O2 | 166 [9, 12, 58] | 499.2696 | 500.2769 | + H | 500.2768 | 0.00 | 72.1 | 17.5-350 | 0.9996 | 7.89 | DMSO | LC Laboratories (Woburn, USA) | y = 19.955x-0.573 |
| Palbociclib | C24H29N7O2 | 61 [9, 12, 59] | 447.2383 | 448.2456 | + H | 448.2455 | 0.00 | 380.2 | 6-120 | 0.9991 | 7.60 | DMSO | Merck (Darmstadt, Germany) | y = 18.125x-0.538 |
| Pazopanib | C21H23N7O2S | 24000 [9, 12, 60] | 437.1634 | 438.1707 | + H | 438.1707 | 0.00 | 184.1 | 52-1040 | 0.9995 | 7.92 | DMSO | Merck (Darmstadt, Germany) | y = 21.135x-0.604 |
| ***Pemigatinib*** | C24H27F2N5O4 | 34.93 [61] | 487.2031 | 488.2104 | + H | 488.2104 | 0.00 | 401.1 | 4-80 | 0.9995 | 7.36 | DMSO | MedChemTronica (Sollentuna, Sweden) | y = 17.045x-0.52 |
| Pomalidomide | C13H11N3O4 | 10.9 [62] | 273.0750 | 274.0822 | + H | 274.0822 | -0.04 | 201.1 | 4-80 | 0.9994 | 5.13 | DMSO | Absource (Munich, Germany) | y = 7.4671x-0.253 |
| Ponatinib | C29H27F3N6O | 34 [9, 12, 63] | 532.2198 | 533.2271 | + H | 533.2271 | 0.00 | 260.1 | 3.5-70 | 0.9996 | 11.74 | DMSO | LC Laboratories (Woburn, USA) | y = 38.796x-0.739 |
| ***Pralsetinib*** | C27H32FN9O2 | 1150 [64] | 533.2663 | 534.2736 | + H | 534.2736 | 0.00 | 190.1 | 60-1200 | 0.9994 | 10.20 | DMSO | MedChemTronica (Sollentuna, Sweden) | y = 30.874x-0.684 |
| Regorafenib | C21H15ClF4N4O3 | 1400 [9, 12, 65] | 482.0769 | 483.0842 | + H | 483.0842 | 0.00 | 288.1 | 140-2800 | 0.9995 | 15.10 | DMSO | LC Laboratories (Woburn, USA) | y = 52.9x-0.776 |
| Ribociclib | C23H30N8O | 732 [9, 66] | 434.2543 | 435.2615 | + H | 435.2615 | -0.02 | 322.1 | 75-1500 | 0.9989 | 5.45 | DMSO | LC Laboratories (Woburn, USA) | y = 10.392x-0.408 |
| Rucaparib | C19H18FN3O | 1754 [9, 67] | 323.1434 | 324.1507 | + H | 324.1507 | 0.00 | 293.1 | 175-3500 | 0.9987 | 5.84 | DMSO | LC Laboratories (Woburn, USA) | y = 10.86x-0.391 |
| Ruxolitinib | C17H18N6 | 11.4 [9, 68] | 306.1593 | 307.1666 | + H | 307.1666 | 0.00 | 186.1 | 1.25-25 | 0.9997 | 8.32 | DMSO | LC Laboratories (Woburn, USA) | y = 18.888x-0.51 |
| ***Selpercatinib*** | C29H31N7O3 | 1445* [69] | 525.2488 | 526.2561 | + H | 526.2561 | -0.02 | 122.1 | 150-3000 | 0.9996 | 8.51 | DMSO | MedChemTronica (Sollentuna, Sweden) | y = 23.409x-0.622 |
| ***Selumetinib*** | C17H15BrClFN4O3 | 53 [70] | 456.0000 | 457.0073 | + H | 457.0073 | 0.00 | n/d | 5-100 | 0.9993 | 10.93 | DMSO | LC Laboratories (Woburn, USA) | y = 30.206x-0.631 |
| Sonidegib | C26H26F3N3O3 | 890 [71] | 485.1926 | 486.1999 | + H | 486.1999 | -0.02 | 428.2 | 100-2000 | 0.9995 | 14.98 | DMSO | LC Laboratories (Woburn, USA) | y = 51.364x-0.764 |
| Sorafenib | C21H16ClF3N4O3 | 3750 [9, 12, 72] | 464.0863 | 465.0936 | + H | 465.0936 | 0.00 | 252.1 | 375-7500 | 0.9999 | 14.77 | DMSO | Absource (Munich, Germany) | y = 51.46x-0.771 |
| Sunitinib | C22H27FN4O2 | 51.6 [9, 12, 35] | 398.2118 | 399.2191 | + H | 399.2191 | 0.00 | 283.1 | 5-100 | 0.9998 | 9.10 | MeOH | Merck (Darmstadt, Germany) | y = 24.918x-0.622 |
| ***Talazoparib*** | C19H14F2N6O | 3.54 [9, 73] | 380.1197 | 381.1270 | + H | 381.1270 | -0.03 | 285.1 | 2-40 | 0.9983 | 8.58 | DMSO | Toronto Research Chemicals (North York, Canada) | y = 20.529x-0.54 |
| ***Tamoxifen*** | C26H29NO | n.a. | 371.2249 | 372.2322 | + H | 372.2322 | 0.00 | 72.1 | 3-60 | 0.9993 | 13.37 | DMSO | MedChemTronica (Sollentuna, Sweden) | y = 46.096x-0.764 |
| Thalidomide | C13H10N2O4 | 600 [74] | 258.0641 | 259.0713 | + H | 259.0713 | -0.04 | 186.1 | 60-1200 | 0.9983 | 5.47 | DMSO | Absource (Munich, Germany) | y = 8.3058x-0.275 |
| ***Tivozanib*** | C22H19ClN4O5 | 80 [9, 75] | 454.1044 | 455.1117 | + H | 455.1117 | -0.02 | 357.1 | 8-160 | 0.9996 | 10.63 | DMSO | Absource (Munich, Germany) | y = 32.673x-0.694 |
| Trametinib | C26H23FIN5O4 | 12.1 [9, 12, 76] | 615.0779 | 638.0671 | + Na | 638.0671 | 0.00 | n/d | 2.5-50 | 0.9992 | 14.47 | DMSO | BIOZOL (Munich, Germany) | y = 49.266x-0.757 |
| Trifluridine | C10H11F3N2O5 | 1135* [77] | 296.0620 | 319.0512 | + Na | 319.0512 | -0.09 | 220.9 | 125-2500 | 0.9982 | 1.94 | DMSO | Absource (Munich, Germany) | y = -0.0818x + 1.9402 |
| ***Tucatinib*** | C26H24N8O2 | 395* [78] | 480.2022 | 481.2095 | + H | 481.2095 | 0.00 | 384.2 | 40-800 | 0.9981 | 7.35 | DMSO | MedChemTronica (Sollentuna, Sweden) | y = 17.895x-0.549 |
| Vandetanib | C22H24BrFN4O2 | 795 [9, 12, 79] | 474.1067 | 475.1139 | + H | 475.1139 | -0.02 | 112.1 | 80-1600 | 0.9987 | 6.90 | DMSO | LC Laboratories (Woburn, USA) | y = 15.065x-0.485 |
| Vemurafenib | C23H18ClF2N3O3S | 39000 [9, 12, 80] | 489.0725 | 490.0798 | + H | 490.0798 | -0.02 | 383.1 | 100-2000 | 0.9993 | 14.86 | DMSO | LC Laboratories (Woburn, USA) | y = 51.679x-0.77 |
| Venetoclax | C45H50ClN7O7S | 520 [9, 81] | 867.3181 | 868.3254 | + H | 868.3254 | -0.01 | 321.1 | 55-1100 | 0.9999 | 14.11 | DMSO | LC Laboratories (Woburn, USA) | y = 50.66x-0.791 |
| Vinorelbine | C45H54N4O8 | 2.6 [82] | 778.3942 | 779.4014 | + H | 779.4014 | 0.00 | 122.1 | 6-120 | 0.9956 | 9.21 | DMSO | Absource (Munich, Germany) | y = 27.902x-0.685 |
| Vismodegib | C19H14Cl2N2O3S | 11367 [9, 83] | 420.0102 | 421.0175 | + H | 421.0175 | -0.02 | 342.0 | 1150-23000 | 0.9984 | 10.77 | DMSO | LC Laboratories (Woburn, USA) | y = 29.623x-0.628 |
| ***Zanubrutinib*** | C27H29N5O3 | 14.1 [84] | 471.2270 | 472.2343 | + H | 472.2343 | 0.00 | 455.2 | 1.5-30 | 0.9994 | 12.36 | DMSO | MedChemTronica (Sollentuna, Sweden) | y = 39.59x-0.719 |
| ***Δ4-abiraterone*** | C24H29NO | 1.6 [85] | 347.2249 | 348.2322 | + H | 348.2322 | 0.00 | 156.1 | 1-20 | 0.9999 | 12.75 | DMSO | MedChemTronica (Sollentuna, Sweden) | y = 37.422x-0.67 |

*calculated based on cmax

**Calculated from the total amount of parent ion and active metabolite

# minimum steady-state blood plasma concentration after multiple dose administration

n/d = not detectable

n.a. = not applicable

| **Supplementary Table 2.** Overview of the concentrations and internal standards used for the eight-point calibration curves of the individual compounds. | | | | | | | | | |
| --- | --- | --- | --- | --- | --- | --- | --- | --- | --- |
| **Oral antitumor drug** | **STD 1**  **[ng/mL]**  **ULOV** | **STD 2**  **[ng/mL]** | **STD 3**  **[ng/mL]** | **STD 4**  **[ng/mL]**  **MOV** | **STD 5**  **[ng/mL]** | **STD 6**  **[ng/mL]** | **STD 7**  **[ng/mL]**  **LOV** | **STD 8**  **[ng/mL]**  **LLOV** | **Internal Standard** |
| Abemaciclib | 400 .00 | 320.00 | 256.00 | 200.00 | 160.00 | 100.00 | 40.00 | 20.00 | [2H5]-lenvatinib (RT 7.13 min) |
| Abiraterone | 20.00 | 16.00 | 12.80 | 10.00 | 8.00 | 5.00 | 2.00 | 1.00 | [2H3]-clopidogrel (RT 12.20) |
| Afatinib | 30.00 | 24.00 | 19.20 | 15.00 | 12.00 | 7.50 | 3.00 | 1.50 | [2H5]-lenvatinib (RT 7.13 min) |
| Alectinib | 1,200.00 | 960.00 | 768.00 | 600.00 | 480.00 | 300.00 | 120.00 | 60.00 | [2H3]-clopidogrel (RT 12.20) |
| Anagrelide | 15.00 | 12.00 | 9.60 | 7.50 | 6.00 | 3.75 | 1.50 | 0.75 | [2H5]-lenvatinib (RT 7.13 min) |
| Anastrazole | 70.00 | 56.00 | 44.80 | 35.00 | 28.00 | 17.50 | 7.00 | 3.50 | [2H4]-olaparib (RT 9.29) |
| Apalutamide | 7,500.00 | 6,000.00 | 4,800.00 | 3,750.00 | 3,000.00 | 1,875.00 | 750.00 | 375.00 | [2H3]-clopidogrel (RT 12.20) |
| Axitinib | 10.00 | 8.00 | 6.40 | 5.00 | 4.00 | 2.50 | 1.00 | 0.50 | [2H4]-olaparib (RT 9.29) |
| Bicalutamide | 20,000.00 | 16,000.00 | 12,800.00 | 10,000.00 | 8,000.00 | 5,000.00 | 2,000.00 | 1,000.00 | [2H3]-clopidogrel (RT 12.20) |
| Binimetinib | 100.00 | 80.00 | 64.00 | 50.00 | 40.00 | 25.00 | 10.00 | 5.00 | [2H4]-olaparib (RT 9.29) |
| Bosutinib | 300.00 | 240.00 | 192.00 | 150.00 | 120.00 | 75.00 | 30.00 | 15.00 | [2H5]-lenvatinib (RT 7.13 min) |
| Brigatinib | 1,000.00 | 800.00 | 640.00 | 500.00 | 400.00 | 250.00 | 100.00 | 50.00 | [2H5]-lenvatinib (RT 7.13 min) |
| Cabozantinib | 3,000.00 | 2,400.00 | 1,920.00 | 1,500.00 | 1,200.00 | 750.00 | 300.00 | 150.00 | [2H3]-clopidogrel (RT 12.20) |
| Ceritinib | 1,800.00 | 1,440.00 | 1,152.00 | 900.00 | 720.00 | 450.00 | 180.00 | 90.00 | [2H3]-clopidogrel (RT 12.20) |
| Cobimetinib | 250.00 | 200.00 | 160.00 | 125.00 | 100.00 | 62.50 | 25.00 | 12.50 | [2H3]-clopidogrel (RT 12.20) |
| Crizotinib | 500.00 | 400.00 | 320.00 | 250.00 | 200.00 | 125.00 | 50.00 | 25.00 | [2H5]-lenvatinib (RT 7.13 min) |
| Dabrafenib | 100.00 | 80.00 | 64.00 | 50.00 | 40.00 | 25.00 | 10.00 | 5.00 | [2H3]-sorafenib (RT 14.80) |
| Dacomitinib | 150.00 | 120.00 | 96.00 | 75.00 | 60.00 | 37.50 | 15.00 | 7.50 | [2H5]-lenvatinib (RT 7.13 min) |
| Darolutamide | 8,000.00 | 6,400.00 | 5,120.00 | 4,000.00 | 3,200.00 | 2,000.00 | 800.00 | 400.00 | [2H3]-clopidogrel (RT 12.20) |
| Dasatinib | 20.00 | 16.00 | 12.80 | 10.00 | 8.00 | 5.00 | 2.00 | 1.00 | [2H4]-olaparib (RT 9.29) |
| Duvelisib | 1,500.00 | 1,200.00 | 960.00 | 750.00 | 600.00 | 375.00 | 150.00 | 75.00 | [2H4]-olaparib (RT 9.29) |
| Encorafenib | 50.00 | 40.00 | 32.00 | 25.00 | 20.00 | 12.50 | 5.00 | 2.50 | [2H3]-clopidogrel (RT 12.20) |
| Endoxifen | 100.00 | 80.00 | 64.00 | 60.00 | 40.00 | 25.00 | 10.00 | 5.00 | [2H3]-sorafenib (RT 14.80) |
| Entrectinib | 2,500.00 | 2,000.00 | 1,600.00 | 1,250.00 | 1,000.00 | 625.00 | 250.00 | 125.00 | [2H3]-clopidogrel (RT 12.20) |
| Enzalutamide | 22,500.00 | 18,000.00 | 14,400.00 | 11,250.00 | 9,000.00 | 5,625.00 | 2,250.00 | 1,125.00 | [2H3]-clopidogrel (RT 12.20) |
| Erlotinib | 2,000.00 | 1,600.00 | 1,280.00 | 1,000.00 | 800.00 | 500.00 | 200.00 | 100.00 | [2H4]-olaparib (RT 9.29) |
| Fedratinib | 1,800.00 | 1,440.00 | 1,152.00 | 900.00 | 720.00 | 450.00 | 180.00 | 90.00 | [2H5]-lenvatinib (RT 7.13 min) |
| Gefitinib | 500.00 | 400.00 | 320.00 | 250.00 | 200.00 | 125.00 | 50.00 | 25 | [2H5]-lenvatinib (RT 7.13 min) |
| Gilteritinib | 1,000.00 | 800.00 | 640.00 | 500.00 | 400.00 | 250.00 | 100.00 | 50.00 | [2H5]-lenvatinib (RT 7.13 min) |
| Glasgedib | 800.00 | 640.00 | 512.00 | 400.00 | 320.00 | 200.00 | 80.00 | 40.00 | [2H5]-lenvatinib (RT 7.13 min) |
| Hydroxy-dabrafenib | 100.00 | 80.00 | 64.00 | 50.00 | 40.00 | 25.00 | 10.00 | 5.00 | [2H3]-clopidogrel (RT 12.20) |
| Ibrutinib | 150.00 | 120.00 | 96.00 | 75.00 | 60.00 | 37.50 | 15.00 | 7.50 | [2H3]-sorafenib (RT 14.80) |
| Idelalisib | 800.00 | 640.00 | 512.00 | 400.00 | 320.00 | 200.00 | 80.00 | 40.00 | [2H4]-olaparib (RT 9.29) |
| Imatinib | 2,000.00 | 1,600.00 | 1,280.00 | 1,000.00 | 800.00 | 500.00 | 200.00 | 100.00 | [2H5]-lenvatinib (RT 7.13 min) |
| Lapatinib | 1,600.00 | 1,280.00 | 1,024.00 | 800.00 | 640.00 | 400.00 | 160.00 | 80.00 | [2H3]-clopidogrel (RT 12.20) |
| Larotrectinib | 50.00 | 40.00 | 32.00 | 25.00 | 20.00 | 12.50 | 5.00 | 2.50 | [2H3]-clopidogrel (RT 12.20) |
| Lenalidomide | 30.00 | 24.00 | 19.20 | 15.00 | 12.00 | 7.50 | 3.00 | 1.50 | [2H5]-lenvatinib (RT 7.13 min) |
| Lenvatinib | 100.00 | 80.00 | 64.00 | 50.00 | 40.00 | 25.00 | 10.00 | 5.00 | [2H4]-olaparib (RT 9.29) |
| Letrozole | 200.00 | 160.00 | 128.00 | 100.00 | 80.00 | 50.00 | 20.00 | 10.00 | [2H4]-olaparib (RT 9.29) |
| Lorlatinib | 300.00 | 240.00 | 192.00 | 150.00 | 120.00 | 75.00 | 30.00 | 15.00 | [2H5]-lenvatinib (RT 7.13 min) |
| Midostaurin | 2,000.00 | 1,600.00 | 1,280.00 | 1,000.00 | 800.00 | 500.00 | 200.00 | 100.00 | [2H3]-sorafenib (RT 14.80) |
| N-desmethyl enzalutamide | 16,000.00 | 12,800.00 | 10,240.00 | 8,000.00 | 6,400.00 | 4,000.00 | 1,600.00 | 800.00 | [2H3]-clopidogrel (RT 12.20) |
| Neratinib | 100.00 | 80.00 | 64.00 | 50.00 | 40.00 | 25.00 | 10.00 | 5.00 | [2H5]-lenvatinib (RT 7.13 min) |
| Nilotinib | 2,400.00 | 1,920.00 | 1,536.00 | 1,200.00 | 960.00 | 600.00 | 240.00 | 120.00 | [2H3]-clopidogrel (RT 12.20) |
| Nintedanib | 30.00 | 24.00 | 19.20 | 15.00 | 12.00 | 7.50 | 3.00 | 1.50 | [2H3]-clopidogrel (RT 12.20) |
| Niraparib | 1,300.00 | 1,040.00 | 832.00 | 650.00 | 520.00 | 325.00 | 130.00 | 65.00 | [2H5]-lenvatinib (RT 7.13 min) |
| N-oxid sorafenib | 1,600.00 | 1,280.00 | 1,024.00 | 800.00 | 640.00 | 400.00 | 160.00 | 80.00 | [2H3]-sorafenib (RT 14.80) |
| Olaparib | 3,000.00 | 2,400.00 | 1,920.00 | 1,500.00 | 1,200.00 | 750.00 | 300.00 | 150.00 | [2H4]-olaparib (RT 9.29) |
| Osimertinib | 350.00 | 280.00 | 224.00 | 175.00 | 140.00 | 87.50 | 35.00 | 17.50 | [2H5]-lenvatinib (RT 7.13 min) |
| Palbociclib | 120.00 | 96.00 | 76.80 | 60.00 | 48.00 | 30.00 | 12.00 | 6.00 | [2H5]-lenvatinib (RT 7.13 min) |
| Pazopanib | 1,000.00 | 800.00 | 640.00 | 500.00 | 400.00 | 250.00 | 100.00 | 50.00 | [2H4]-olaparib (RT 9.29) |
| Pemigatinib | 80.00 | 64.00 | 51.20 | 40.00 | 32.00 | 20.00 | 8.00 | 4.00 | [2H5]-lenvatinib (RT 7.13 min) |
| Pomalidomide | 80.00 | 64.00 | 51.20 | 40.00 | 32.00 | 20.00 | 8.00 | 4.00 | [2H5]-lenvatinib (RT 7.13 min) |
| Ponatinib | 70.00 | 56.00 | 44.80 | 35.00 | 28.00 | 17.50 | 7.00 | 3.50 | [2H3]-clopidogrel (RT 12.20) |
| Pralsetinib | 1,200.00 | 960.00 | 768.00 | 600.00 | 480.00 | 300.00 | 120.00 | 60.00 | [2H3]-clopidogrel (RT 12.20) |
| Regorafenib | 3,000.00 | 2,400.00 | 1,920.00 | 1,500.00 | 1,200.00 | 750.00 | 300.00 | 150.00 | [2H3]-clopidogrel (RT 12.20) |
| Ribociclib | 1,500.00 | 1,200.00 | 960.00 | 750.00 | 600.00 | 375.00 | 150.00 | 75.00 | [2H5]-lenvatinib (RT 7.13 min) |
| Rucaparib | 3,500.00 | 2,800.00 | 2,240.00 | 1,750.00 | 1,400.00 | 875.00 | 350.00 | 175.00 | [2H5]-lenvatinib (RT 7.13 min) |
| Ruxolitinib | 25.00 | 20.00 | 16.00 | 12.50 | 10.00 | 6.25 | 2.50 | 1.25 | [2H5]-lenvatinib (RT 7.13 min) |
| Selpercatinib | 3,000.00 | 2,400.00 | 1,920.00 | 1,500.00 | 1,200.00 | 750.00 | 300.00 | 150.00 | [2H4]-olaparib (RT 9.29) |
| Selumetinib | 100.00 | 80.00 | 64.00 | 50.00 | 40.00 | 25.00 | 10.00 | 5.00 | [2H3]-clopidogrel (RT 12.20) |
| Sonidegib | 2,000.00 | 1,600.00 | 1,280.00 | 1,000.00 | 800.00 | 500.00 | 200.00 | 100.00 | [2H3]-sorafenib (RT 14.80) |
| Sorafenib | 7,500.00 | 6,000.00 | 4,800.00 | 3,750.00 | 3,000.00 | 1,875.00 | 750.00 | 375.00 | [2H3]-sorafenib (RT 14.80) |
| Sunitinib | 100.00 | 80.00 | 64.00 | 50.00 | 40.00 | 25.00 | 10.00 | 5.00 | [2H4]-olaparib (RT 9.29) |
| Talazoparib | 40.00 | 32.00 | 25.60 | 20.00 | 16.00 | 10.00 | 5.00 | 2.00 | [2H4]-olaparib (RT 9.29) |
| Tamoxifen | 60.00 | 48.00 | 38.40 | 30.00 | 24.00 | 15.00 | 6.00 | 3.00 | [2H3]-sorafenib (RT 14.80) |
| Thalidomide | 1,200.00 | 960.00 | 768.00 | 600.00 | 480.00 | 300.00 | 120.00 | 60.00 | [2H5]-lenvatinib (RT 7.13 min) |
| Tivozanib | 160.00 | 128.00 | 102.40 | 80.00 | 64.00 | 40.00 | 16.00 | 8.00 | [2H3]-clopidogrel (RT 12.20) |
| Trametinib | 50.00 | 40.00 | 32.00 | 25.00 | 20.00 | 12.50 | 5.00 | 2.50 | [2H3]-sorafenib (RT 14.80) |
| Trifluridine | 2,000.00 | 1,600.00 | 1,280.00 | 1,000.00 | 800.00 | 500.00 | 200.00 | 100.00 | [2H5]-lenvatinib (RT 7.13 min) |
| Tucatinib | 800.00 | 640.00 | 512.00 | 400.00 | 320.00 | 200.00 | 80.00 | 40.00 | [2H5]-lenvatinib (RT 7.13 min) |
| Vandetanib | 1,600.00 | 1,280.00 | 1,024.00 | 800.00 | 640.00 | 400.00 | 160.00 | 80.00 | [2H5]-lenvatinib (RT 7.13 min) |
| Vemurafenib | 2,000.00 | 1,600.00 | 1,280.00 | 1,000.00 | 800.00 | 500.00 | 200.00 | 100.00 | [2H3]-sorafenib (RT 14.80) |
| Venetoclax | 1,100.00 | 880.00 | 704.00 | 550.00 | 440.00 | 275.00 | 110.00 | 55.00 | [2H3]-sorafenib (RT 14.80) |
| Vinorelbine | 120.00 | 96.00 | 76.80 | 60.00 | 48.00 | 30.00 | 12.00 | 6.00 | [2H3]-sorafenib (RT 14.80) |
| Vismodegib | 23,000.00 | 18,400.00 | 14,720.00 | 11,500.00 | 9,200.00 | 5,750.00 | 2,300.00 | 1,150.00 | [2H3]-clopidogrel (RT 12.20) |
| Zanubrutinib | 30.00 | 24.00 | 19.20 | 15.00 | 12.00 | 7.50 | 3.00 | 1.50 | [2H3]-clopidogrel (RT 12.20) |
| Δ4-abiraterone | 20.00 | 16.00 | 12.80 | 10.00 | 8.00 | 5.00 | 2.00 | 1.00 | [2H3]-sorafenib (RT 14.80) |

STD = standard

ULOV = upper limit of validation

MOV = middle of validation limit

LOV = low limit of validation

LLOV = lowest limit of validation

| **Supplementary Table 3.** Triplicate measurements of retention times and associated mean and standard deviations (SD) of all 78 compounds at training gradients 1-3 (0.83% MeOH/min, 1.50% MeOH/min, 3.50% MeOH/min). | | | | | | | | | | | | | | | |
| --- | --- | --- | --- | --- | --- | --- | --- | --- | --- | --- | --- | --- | --- | --- | --- |
| **Oral antitumor drug** | **Measured RT at training gradient 1 (0.83% MeOH/min) [min]** | | | | | **Measured RT at training gradient 2 (1.50% MeOH/min) [min]** | | | | | **Measured RT at training gradient 3 (3.50% MeOH/min) [min]** | | | | | |
| **1** | **2** | **3** | **Mean** | **SD** | **1** | **2** | **3** | **Mean** | **SD** | **1** | **2** | **3** | **Mean** | **SD** | |
| Abemaciclib | 18.81 | 18.80 | 18.78 | 18.80 | 0.02 | 13.40 | 13.40 | 13.38 | 13.39 | 0.01 | 8.65 | 8.64 | 8.62 | 8.64 | 0.02 | |
| Abiraterone | 47.25 | 47.29 | 47.25 | 47.26 | 0.02 | 30.73 | 30.80 | 30.81 | 30.78 | 0.04 | 16.98 | 16.98 | 16.96 | 16.97 | 0.01 | |
| Afatinib | 16.08 | 16.14 | 16.03 | 16.08 | 0.06 | 11.76 | 11.78 | 11.74 | 11.76 | 0.02 | 7.93 | 7.93 | 7.89 | 7.92 | 0.02 | |
| Alectinib | 36.92 | 36.88 | 36.92 | 36.91 | 0.02 | 23.64 | 23.69 | 23.65 | 23.66 | 0.03 | 12.94 | 12.95 | 12.94 | 12.94 | 0.01 | |
| Anagrelide | 18.95 | 19.03 | 18.94 | 18.97 | 0.05 | 14.46 | 14.45 | 14.44 | 14.45 | 0.01 | 9.84 | 9.84 | 9.83 | 9.84 | 0.01 | |
| Anastrazole | 23.78 | 23.74 | 23.73 | 23.75 | 0.03 | 16.67 | 16.67 | 16.65 | 16.66 | 0.01 | 10.30 | 10.31 | 10.30 | 10.30 | 0.01 | |
| Apalutamide | 43.69 | 43.77 | 43.68 | 43.71 | 0.05 | 28.14 | 28.17 | 28.20 | 28.17 | 0.03 | 15.36 | 15.38 | 15.35 | 15.36 | 0.02 | |
| Axitinib | 25.8 | 25.79 | 25.79 | 25.79 | 0.01 | 17.73 | 17.72 | 17.71 | 17.72 | 0.01 | 10.68 | 10.69 | 10.68 | 10.68 | 0.01 | |
| Bicalutamide | 39.46 | 39.52 | 39.49 | 39.49 | 0.03 | 25.77 | 25.82 | 25.83 | 25.81 | 0.03 | 14.35 | 14.35 | 14.32 | 14.34 | 0.02 | |
| Binimetinib | 27.42 | 27.44 | 27.44 | 27.43 | 0.01 | 19.22 | 19.28 | 19.24 | 19.25 | 0.03 | 11.69 | 11.71 | 11.72 | 11.71 | 0.02 | |
| Bosutinib | 23.41 | 23.39 | 23.38 | 23.39 | 0.02 | 16.28 | 16.27 | 16.25 | 16.27 | 0.02 | 9.98 | 9.98 | 9.97 | 9.98 | 0.01 | |
| Brigatinib | 15.67 | 15.70 | 15.61 | 15.66 | 0.05 | 11.33 | 11.34 | 11.28 | 11.32 | 0.03 | 7.57 | 7.57 | 7.53 | 7.56 | 0.02 | |
| Cabozantinib | 40.82 | 40.86 | 40.78 | 40.82 | 0.04 | 25.84 | 25.87 | 25.91 | 25.87 | 0.04 | 13.93 | 13.92 | 13.88 | 13.91 | 0.03 | |
| Ceritinib | 48.38 | 48.43 | 48.36 | 48.39 | 0.04 | 30.25 | 30.31 | 30.33 | 30.30 | 0.04 | 15.89 | 15.90 | 15.88 | 15.89 | 0.01 | |
| Cobimetinib | 38.33 | 38.38 | 38.39 | 38.37 | 0.03 | 24.97 | 25.06 | 25.04 | 25.02 | 0.05 | 13.89 | 13.88 | 13.85 | 13.87 | 0.02 | |
| Crizotinib | 17.6 | 17.61 | 17.56 | 17.59 | 0.03 | 12.51 | 12.52 | 12.48 | 12.50 | 0.02 | 8.08 | 8.07 | 8.04 | 8.06 | 0.02 | |
| Dabrafenib | 49.14 | 49.13 | 49.10 | 49.12 | 0.02 | 30.93 | 31.00 | 31.02 | 30.98 | 0.05 | 16.43 | 16.43 | 16.42 | 16.43 | 0.01 | |
| Dacomitinib | 18.56 | 18.52 | 18.52 | 18.53 | 0.02 | 13.13 | 13.14 | 13.11 | 13.13 | 0.02 | 8.44 | 8.43 | 8.40 | 8.42 | 0.02 | |
| Darolutamide | 35.31 | 35.36 | 35.48 | 35.38 | 0.09 | 23.29 | 23.34 | 23.31 | 23.31 | 0.03 | 13.21 | 13.22 | 13.21 | 13.21 | 0.01 | |
| Dasatinib | 24.89 | 24.83 | 24.86 | 24.86 | 0.03 | 17.08 | 17.06 | 17.04 | 17.06 | 0.02 | 10.27 | 10.28 | 10.26 | 10.27 | 0.01 | |
| Duvelisib | 28.27 | 28.32 | 28.36 | 28.32 | 0.05 | 19.63 | 19.67 | 19.64 | 19.65 | 0.02 | 11.85 | 11.88 | 11.87 | 11.87 | 0.02 | |
| Encorafenib | 37.93 | 37.91 | 37.97 | 37.94 | 0.03 | 24.55 | 24.63 | 24.60 | 24.59 | 0.04 | 13.66 | 13.66 | 13.63 | 13.65 | 0.02 | |
| Endoxifen | 44.03 | 44.16 | 44.03 | 44.03 | 0.08 | 27.79 | 27.83 | 27.86 | 27.83 | 0.04 | 14.81 | 14.81 | 14.78 | 14.80 | 0.02 | |
| Entrectinib | 41.03 | 41.08 | 40.99 | 41.03 | 0.05 | 25.97 | 26.00 | 26.04 | 26.00 | 0.04 | 13.98 | 13.97 | 13.93 | 13.96 | 0.03 | |
| Enzalutamide | 42.68 | 42.78 | 42.69 | 42.72 | 0.06 | 27.41 | 27.44 | 27.47 | 27.44 | 0.03 | 14.94 | 14.94 | 14.91 | 14.93 | 0.02 | |
| Erlotinib | 27.52 | 27.52 | 27.54 | 27.53 | 0.01 | 18.48 | 18.48 | 18.47 | 18.48 | 0.01 | 10.80 | 10.82 | 10.81 | 10.81 | 0.01 | |
| Fedratinib | 16.27 | 16.24 | 16.18 | 16.23 | 0.05 | 11.43 | 11.42 | 11.38 | 11.41 | 0.03 | 7.40 | 7.40 | 7.35 | 7.38 | 0.03 | |
| Gefitinib | 11.46 | 11.75 | 11.44 | 11.45 | 0.17 | 8.93 | 8.94 | 8.83 | 8.90 | 0.06 | 6.59 | 6.60 | 6.57 | 6.59 | 0.02 | |
| Gilteritinib | 19.14 | 19.11 | 19.11 | 19.12 | 0.02 | 13.24 | 13.26 | 13.23 | 13.24 | 0.02 | 8.30 | 8.29 | 8.26 | 8.28 | 0.02 | |
| Glasgedib | 20.05 | 20.02 | 20.02 | 20.03 | 0.02 | 14.27 | 14.27 | 14.24 | 14.26 | 0.02 | 9.07 | 9.07 | 9.06 | 9.07 | 0.01 | |
| Hydroxy-dabrafenib | 36.92 | 36.88 | 36.92 | 36.91 | 0.02 | 23.93 | 24.00 | 23.95 | 23.96 | 0.04 | 13.32 | 13.33 | 13.32 | 13.32 | 0.01 | |
| Ibrutinib | 50.87 | 50.85 | 50.86 | 50.86 | 0.01 | 32.08 | 32.12 | 32.14 | 32.11 | 0.03 | 17.03 | 17.02 | 17.01 | 17.02 | 0.01 | |
| Idelalisib | 31.99 | 31.98 | 32.07 | 32.01 | 0.05 | 21.65 | 21.67 | 21.67 | 21.66 | 0.01 | 12.63 | 12.65 | 12.66 | 12.65 | 0.02 | |
| Imatinib | 20.12 | 20.12 | 20.09 | 20.11 | 0.02 | 14.18 | 14.20 | 14.18 | 14.19 | 0.01 | 8.97 | 8.96 | 8.95 | 8.96 | 0.01 | |
| Lapatinib | 36.63 | 36.58 | 36.64 | 36.62 | 0.03 | 23.75 | 23.81 | 23.77 | 23.78 | 0.03 | 13.17 | 13.18 | 13.16 | 13.17 | 0.01 | |
| Larotrectinib | 32.15 | 32.14 | 32.25 | 32.18 | 0.06 | 21.54 | 21.58 | 21.56 | 21.56 | 0.02 | 12.44 | 12.46 | 12.46 | 12.45 | 0.01 | |
| Lenalidomide | 2.01 | 1.97 | 2.05 | 2.01 | 0.04 | 1.35 | 1.35 | 1.39 | 1.36 | 0.02 | 1.71 | 1.69 | 1.66 | 1.69 | 0.03 | |
| Lenvatinib | 18.11 | 18.12 | 18.07 | 18.10 | 0.03 | 12.96 | 12.98 | 12.95 | 12.96 | 0.02 | 8.44 | 8.44 | 8.41 | 8.43 | 0.02 | |
| Letrozole | 21.63 | 21.58 | 21.56 | 21.59 | 0.04 | 15.62 | 15.63 | 15.58 | 15.61 | 0.03 | 9.99 | 9.99 | 9.98 | 9.99 | 0.01 | |
| Lorlatinib | 15.70 | 15.79 | 15.65 | 15.71 | 0.07 | 11.64 | 11.65 | 11.59 | 11.63 | 0.03 | 7.95 | 7.94 | 7.91 | 7.93 | 0.02 | |
| Midostaurin | 61.49 | 61.44 | 61.45 | 61.46 | 0.03 | 37.69 | 37.74 | 37.70 | 37.71 | 0.03 | 19.23 | 19.25 | 19.22 | 19.23 | 0.02 | |
| N-desmethyl enzalutamide | 39.58 | 39.59 | 39.62 | 39.60 | 0.02 | 25.74 | 25.75 | 25.78 | 25.76 | 0.02 | 14.27 | 14.27 | 14.23 | 14.26 | 0.02 | |
| Neratinib | 23.72 | 23.67 | 23.68 | 23.69 | 0.03 | 16.14 | 16.15 | 16.12 | 16.14 | 0.02 | 9.71 | 9.71 | 9.70 | 9.71 | 0.01 | |
| Nilotinib | 37.64 | 37.65 | 37.700 | 37.66 | 0.03 | 24.34 | 24.42 | 24.38 | 24.38 | 0.04 | 13.47 | 13.48 | 13.46 | 13.47 | 0.01 | |
| Nintedanib | 40.14 | 40.18 | 40.08 | 40.13 | 0.05 | 25.29 | 25.37 | 25.36 | 25.34 | 0.04 | 13.59 | 13.60 | 13.57 | 13.59 | 0.02 | |
| Niraparib | 17.42 | 17.44 | 17.40 | 17.42 | 0.02 | 12.49 | 12.49 | 12.46 | 12.48 | 0.02 | 8.13 | 8.12 | 8.10 | 8.12 | 0.02 | |
| N-oxid sorafenib | 54.96 | 54.90 | 54.88 | 54.91 | 0.04 | 34.13 | 34.21 | 34.21 | 34.18 | 0.05 | 17.81 | 17.77 | 17.77 | 17.78 | 0.02 | |
| Olaparib | 29.27 | 29.27 | 29.32 | 29.29 | 0.03 | 19.57 | 19.60 | 19.58 | 19.58 | 0.02 | 11.36 | 11.38 | 11.38 | 11.37 | 0.01 | |
| Osimertinib | 22.74 | 22.69 | 22.70 | 22.71 | 0.03 | 15.57 | 15.57 | 15.55 | 15.56 | 0.01 | 9.46 | 9.46 | 9.44 | 9.45 | 0.01 | |
| Palbociclib | 20.46 | 20.42 | 20.42 | 20.43 | 0.02 | 14.35 | 14.37 | 14.35 | 14.36 | 0.01 | 9.04 | 9.03 | 9.01 | 9.03 | 0.02 | |
| Pazopanib | 24.27 | 24.24 | 24.25 | 24.25 | 0.02 | 16.27 | 16.27 | 16.25 | 16.26 | 0.01 | 9.60 | 9.60 | 9.59 | 9.60 | 0.01 | |
| Pemigatinib | 19.13 | 19.13 | 19.10 | 19.12 | 0.02 | 13.6 | 13.62 | 13.61 | 13.61 | 0.01 | 8.72 | 8.71 | 8.69 | 8.71 | 0.02 | |
| Pomalidomide | 7.82 | 8.24 | 7.89 | 7.86 | 0.23 | 6.62 | 6.60 | 6.60 | 6.61 | 0.01 | 5.60 | 5.61 | 5.63 | 5.61 | 0.02 | |
| Ponatinib | 45.45 | 45.57 | 45.46 | 45.46 | 0.07 | 28.38 | 28.40 | 28.41 | 28.40 | 0.02 | 14.90 | 14.90 | 14.87 | 14.89 | 0.02 | |
| Pralsetinib | 35.90 | 35.83 | 35.89 | 35.87 | 0.04 | 23.04 | 23.08 | 23.06 | 23.06 | 0.02 | 12.67 | 12.70 | 12.69 | 12.69 | 0.02 | |
| Regorafenib | 62.17 | 62.18 | 62.20 | 62.18 | 0.02 | 38.22 | 38.23 | 38.21 | 38.22 | 0.01 | 19.48 | 19.49 | 19.46 | 19.48 | 0.02 | |
| Ribociclib | 11.43 | 11.71 | 11.40 | 11.42 | 0.17 | 8.64 | 8.66 | 8.54 | 8.61 | 0.06 | 6.21 | 6.24 | 6.22 | 6.22 | 0.02 | |
| Rucaparib | 11.82 | 12.08 | 11.80 | 11.81 | 0.16 | 9.15 | 9.15 | 9.06 | 9.12 | 0.05 | 6.68 | 6.69 | 6.66 | 6.68 | 0.02 | |
| Ruxolitinib | 21.03 | 21.03 | 20.97 | 21.01 | 0.03 | 15.22 | 15.22 | 15.21 | 15.22 | 0.01 | 9.84 | 9.83 | 9.82 | 9.83 | 0.01 | |
| Selpercatinib | 26.92 | 26.91 | 26.92 | 26.92 | 0.01 | 17.92 | 17.88 | 17.91 | 17.90 | 0.02 | 10.38 | 10.40 | 10.39 | 10.39 | 0.01 | |
| Selumetinib | 34.37 | 34.38 | 34.44 | 34.40 | 0.04 | 23.20 | 23.22 | 23.21 | 23.21 | 0.01 | 13.44 | 13.45 | 13.43 | 13.44 | 0.01 | |
| Sonidegib | 60.24 | 60.19 | 60.19 | 60.21 | 0.03 | 37.27 | 37.32 | 37.30 | 37.30 | 0.03 | 19.21 | 19.22 | 19.19 | 19.21 | 0.02 | |
| Sorafenib | 60.52 | 60.43 | 60.48 | 60.48 | 0.05 | 37.21 | 37.25 | 37.23 | 37.23 | 0.02 | 19.03 | 19.05 | 19.01 | 19.03 | 0.02 | |
| Sunitinib | 28.47 | 28.51 | 28.59 | 28.52 | 0.06 | 19.11 | 19.14 | 19.12 | 19.12 | 0.02 | 11.10 | 11.12 | 11.12 | 11.11 | 0.01 | |
| Talazoparib | 23.01 | 23.02 | 22.98 | 23.00 | 0.02 | 16.32 | 16.35 | 16.31 | 16.33 | 0.02 | 10.25 | 10.27 | 10.26 | 10.26 | 0.01 | |
| Tamoxifen | 54.17 | 54.14 | 54.13 | 54.15 | 0.02 | 33.40 | 33.43 | 33.43 | 33.42 | 0.02 | 17.22 | 17.19 | 17.19 | 17.20 | 0.02 | |
| Thalidomide | 8.73 | 9.16 | 8.78 | 8.76 | 0.24 | 7.33 | 7.36 | 7.28 | 7.32 | 0.04 | 6.03 | 6.04 | 6.04 | 6.04 | 0.01 | |
| Tivozanib | 37.99 | 37.98 | 38.05 | 38.01 | 0.04 | 24.27 | 24.36 | 24.31 | 24.31 | 0.05 | 13.28 | 13.28 | 13.26 | 13.27 | 0.01 | |
| Trametinib | 57.78 | 57.74 | 57.74 | 57.75 | 0.02 | 35.79 | 35.87 | 35.86 | 35.84 | 0.04 | 18.54 | 18.56 | 18.53 | 18.54 | 0.02 | |
| Trifluridine | 2.10 | 2.06 | 2.15 | 2.10 | 0.05 | 1.53 | 1.54 | 1.50 | 1.52 | 0.02 | 1.79 | 1.81 | 1.81 | 1.80 | 0.01 | |
| Tucatinib | 20.32 | 20.29 | 20.29 | 20.30 | 0.02 | 14.07 | 14.08 | 14.06 | 14.07 | 0.01 | 8.76 | 8.76 | 8.74 | 8.75 | 0.01 | |
| Vandetanib | 16.78 | 16.82 | 16.75 | 16.78 | 0.04 | 12.19 | 12.20 | 12.16 | 12.18 | 0.02 | 8.09 | 8.08 | 8.05 | 8.07 | 0.02 | |
| Vemurafenib | 60.77 | 60.71 | 60.73 | 60.74 | 0.03 | 37.37 | 37.42 | 37.39 | 37.39 | 0.03 | 19.14 | 19.15 | 19.12 | 19.14 | 0.02 | |
| Venetoclax | 60.00 | 59.89 | 59.90 | 59.93 | 0.06 | 36.27 | 36.32 | 36.30 | 36.30 | 0.03 | 18.22 | 18.23 | 18.22 | 18.22 | 0.01 | |
| Vinorelbine | 32.60 | 32.53 | 32.59 | 32.57 | 0.04 | 20.77 | 20.80 | 20.76 | 20.78 | 0.02 | 11.36 | 11.39 | 11.40 | 11.38 | 0.02 | |
| Vismodegib | 33.71 | 33.71 | 33.75 | 33.72 | 0.02 | 22.77 | 22.80 | 22.77 | 22.78 | 0.02 | 13.21 | 13.22 | 13.21 | 13.21 | 0.01 | |
| Zanubrutinib | 46.13 | 46.19 | 46.13 | 46.15 | 0.03 | 29.18 | 29.23 | 29.26 | 29.22 | 0.04 | 15.63 | 15.63 | 15.61 | 15.62 | 0.01 | |
| Δ4-abiraterone | 43.06 | 43.11 | 43.05 | 43.07 | 0.03 | 28.19 | 28.24 | 28.24 | 28.22 | 0.03 | 15.79 | 15.80 | 15.77 | 15.79 | 0.02 | |

RT = Retention times

MeOH = Methanol

| **Supplementary Table 4.** Triplicate measurements of retention times and associated mean and standard deviations (SD) of all 78 compounds at training gradients 4 and 5 (5.87% MeOH/min and 8.80% MeOH/min). | | | | | | | | | | |
| --- | --- | --- | --- | --- | --- | --- | --- | --- | --- | --- |
| **Oral antitumor drug** | **Measured RT at training gradient 4 (5.87% MeOH/min) [min]** | | | | | **Measured RT at training gradient 5 (8.80% MeOH/min) [min]** | | | | |
| **1** | **2** | **3** | **Mean** | **SD** | **1** | **2** | **3** | **Mean** | **SD** |
| Abemaciclib | 6.75 | 6.69 | 6.67 | 6.70 | 0.04 | 5.59 | 5.6 | 5.66 | 5.62 | 0.04 |
| Abiraterone | 12.06 | 12.07 | 12.08 | 12.07 | 0.01 | 9.42 | 9.41 | 9.42 | 9.42 | 0.01 |
| Afatinib | 6.29 | 6.23 | 6.21 | 6.24 | 0.04 | 5.29 | 5.29 | 5.33 | 5.30 | 0.02 |
| Alectinib | 9.26 | 9.23 | 9.26 | 9.25 | 0.02 | 7.31 | 7.27 | 7.29 | 7.29 | 0.02 |
| Anagrelide | 7.78 | 7.72 | 7.71 | 7.74 | 0.04 | 6.48 | 6.47 | 6.52 | 6.49 | 0.03 |
| Anastrazole | 7.87 | 7.81 | 7.81 | 7.83 | 0.03 | 6.43 | 6.41 | 6.47 | 6.44 | 0.03 |
| Apalutamide | 10.88 | 10.89 | 10.89 | 10.89 | 0.01 | 8.51 | 8.50 | 8.50 | 8.50 | 0.01 |
| Axitinib | 8.09 | 8.04 | 8.04 | 8.06 | 0.03 | 6.56 | 6.54 | 6.6 | 6.57 | 0.03 |
| Bicalutamide | 10.28 | 10.27 | 10.28 | 10.28 | 0.01 | 8.1 | 8.09 | 8.08 | 8.09 | 0.01 |
| Binimetinib | 8.81 | 8.77 | 8.77 | 8.78 | 0.02 | 7.14 | 7.10 | 7.14 | 7.13 | 0.02 |
| Bosutinib | 7.61 | 7.55 | 7.54 | 7.57 | 0.04 | 6.19 | 6.19 | 6.25 | 6.21 | 0.03 |
| Brigatinib | 5.98 | 5.93 | 5.92 | 5.94 | 0.03 | 5.05 | 5.04 | 5.08 | 5.06 | 0.02 |
| Cabozantinib | 9.85 | 9.84 | 9.86 | 9.85 | 0.01 | 7.71 | 7.69 | 7.68 | 7.69 | 0.02 |
| Ceritinib | 11.01 | 11.03 | 11.04 | 11.03 | 0.02 | 8.50 | 8.50 | 8.49 | 8.50 | 0.01 |
| Cobimetinib | 9.92 | 9.90 | 9.92 | 9.91 | 0.01 | 7.8 | 7.79 | 7.78 | 7.79 | 0.01 |
| Crizotinib | 6.32 | 6.26 | 6.24 | 6.27 | 0.04 | 5.26 | 5.26 | 5.31 | 5.28 | 0.03 |
| Dabrafenib | 11.46 | 11.48 | 11.49 | 11.48 | 0.02 | 8.88 | 8.87 | 8.88 | 8.88 | 0.01 |
| Dacomitinib | 6.59 | 6.53 | 6.51 | 6.54 | 0.04 | 5.48 | 5.47 | 5.52 | 5.49 | 0.03 |
| Darolutamide | 9.6 | 9.57 | 9.58 | 9.58 | 0.02 | 7.63 | 7.61 | 7.63 | 7.62 | 0.01 |
| Dasatinib | 7.76 | 7.69 | 7.7 | 7.72 | 0.04 | 6.28 | 6.27 | 6.33 | 6.29 | 0.03 |
| Duvelisib | 8.90 | 8.86 | 8.87 | 8.88 | 0.02 | 7.21 | 7.18 | 7.22 | 7.20 | 0.02 |
| Encorafenib | 9.81 | 9.80 | 9.82 | 9.81 | 0.01 | 7.76 | 7.74 | 7.74 | 7.75 | 0.01 |
| Endoxifen | 10.38 | 10.38 | 10.38 | 10.38 | 0.00 | 8.07 | 8.06 | 8.04 | 8.06 | 0.02 |
| Entrectinib | 9.86 | 9.85 | 9.88 | 9.86 | 0.02 | 7.72 | 7.7 | 7.68 | 7.70 | 0.02 |
| Enzalutamide | 10.6 | 10.59 | 10.59 | 10.59 | 0.01 | 8.29 | 8.28 | 8.27 | 8.28 | 0.01 |
| Erlotinib | 8.06 | 8.01 | 8.01 | 8.03 | 0.03 | 6.49 | 6.47 | 6.53 | 6.50 | 0.03 |
| Fedratinib | 5.78 | 5.74 | 5.73 | 5.75 | 0.03 | 4.87 | 4.86 | 4.9 | 4.88 | 0.02 |
| Gefitinib | 5.35 | 5.34 | 5.31 | 5.33 | 0.02 | 4.66 | 4.66 | 4.67 | 4.66 | 0.01 |
| Gilteritinib | 6.43 | 6.36 | 6.34 | 6.38 | 0.05 | 5.32 | 5.31 | 5.36 | 5.33 | 0.03 |
| Glasgedib | 7.03 | 6.96 | 6.95 | 6.98 | 0.04 | 5.78 | 5.78 | 5.85 | 5.80 | 0.04 |
| Hydroxy-dabrafenib | 9.6 | 9.57 | 9.59 | 9.59 | 0.02 | 7.6 | 7.57 | 7.58 | 7.58 | 0.02 |
| Ibrutinib | 11.86 | 11.88 | 11.9 | 11.88 | 0.02 | 9.17 | 9.17 | 9.17 | 9.17 | 0.00 |
| Idelalisib | 9.34 | 9.3 | 9.31 | 9.32 | 0.02 | 7.48 | 7.46 | 7.48 | 7.47 | 0.01 |
| Imatinib | 6.96 | 6.89 | 6.87 | 6.91 | 0.05 | 5.72 | 5.72 | 5.79 | 5.74 | 0.04 |
| Lapatinib | 9.48 | 9.46 | 9.48 | 9.47 | 0.01 | 7.49 | 7.47 | 7.47 | 7.48 | 0.01 |
| Larotrectinib | 9.16 | 9.12 | 9.14 | 9.14 | 0.02 | 7.33 | 7.3 | 7.33 | 7.32 | 0.02 |
| Lenalidomide | 1.16 | 1.12 | 1.11 | 1.13 | 0.03 | 1.05 | 1.1 | 1.14 | 1.10 | 0.05 |
| Lenvatinib | 6.62 | 6.56 | 6.54 | 6.57 | 0.04 | 5.52 | 5.52 | 5.57 | 5.54 | 0.03 |
| Letrozole | 7.73 | 7.67 | 7.66 | 7.69 | 0.04 | 6.35 | 6.33 | 6.39 | 6.36 | 0.03 |
| Lorlatinib | 6.33 | 6.28 | 6.26 | 6.29 | 0.04 | 5.35 | 5.35 | 5.39 | 5.36 | 0.02 |
| Midostaurin | 13.14 | 13.15 | 13.14 | 13.14 | 0.01 | 9.97 | 9.96 | 9.97 | 9.97 | 0.01 |
| N-desmethyl enzalutamide | 10.2 | 10.19 | 10.22 | 10.20 | 0.02 | 8.04 | 8.02 | 8.02 | 8.03 | 0.01 |
| Neratinib | 7.38 | 7.3 | 7.3 | 7.33 | 0.05 | 5.98 | 5.98 | 6.05 | 6.00 | 0.04 |
| Nilotinib | 9.67 | 9.65 | 9.67 | 9.66 | 0.01 | 7.63 | 7.61 | 7.61 | 7.62 | 0.01 |
| Nintedanib | 9.6 | 9.59 | 9.61 | 9.60 | 0.01 | 7.53 | 7.5 | 7.5 | 7.51 | 0.02 |
| Niraparib | 6.37 | 6.31 | 6.29 | 6.32 | 0.04 | 5.31 | 5.31 | 5.35 | 5.32 | 0.02 |
| N-oxid sorafenib | 12.28 | 12.29 | 12.3 | 12.29 | 0.01 | 9.42 | 9.41 | 9.4 | 9.41 | 0.01 |
| Olaparib | 8.44 | 8.4 | 8.4 | 8.41 | 0.02 | 6.8 | 6.77 | 6.81 | 6.79 | 0.02 |
| Osimertinib | 7.23 | 7.15 | 7.14 | 7.17 | 0.05 | 5.88 | 5.88 | 5.94 | 5.90 | 0.03 |
| Palbociclib | 7.00 | 6.93 | 6.91 | 6.95 | 0.05 | 5.75 | 5.75 | 5.81 | 5.77 | 0.03 |
| Pazopanib | 7.25 | 7.17 | 7.16 | 7.19 | 0.05 | 5.85 | 5.85 | 5.92 | 5.87 | 0.04 |
| Pemigatinib | 6.79 | 6.72 | 6.70 | 6.74 | 0.05 | 5.61 | 5.61 | 5.67 | 5.63 | 0.03 |
| Pomalidomide | 4.73 | 4.73 | 4.71 | 4.72 | 0.01 | 4.29 | 4.28 | 4.29 | 4.29 | 0.01 |
| Ponatinib | 10.38 | 10.39 | 10.39 | 10.39 | 0.01 | 8.04 | 8.03 | 8.01 | 8.03 | 0.02 |
| Pralsetinib | 9.12 | 9.09 | 9.11 | 9.11 | 0.02 | 7.21 | 7.19 | 7.21 | 7.20 | 0.01 |
| Regorafenib | 13.29 | 13.30 | 13.28 | 13.29 | 0.01 | 10.06 | 10.06 | 10.06 | 10.06 | 0.00 |
| Ribociclib | 4.98 | 5.00 | 4.96 | 4.98 | 0.02 | 4.35 | 4.35 | 4.36 | 4.35 | 0.01 |
| Rucaparib | 5.40 | 5.39 | 5.36 | 5.38 | 0.02 | 4.68 | 4.69 | 4.70 | 4.69 | 0.01 |
| Ruxolitinib | 7.65 | 7.59 | 7.58 | 7.61 | 0.04 | 6.31 | 6.31 | 6.36 | 6.33 | 0.03 |
| Selpercatinib | 7.75 | 7.68 | 7.69 | 7.71 | 0.04 | 6.22 | 6.22 | 6.28 | 6.24 | 0.03 |
| Selumetinib | 9.80 | 9.78 | 9.79 | 9.79 | 0.01 | 7.84 | 7.81 | 7.82 | 7.82 | 0.02 |
| Sonidegib | 13.18 | 13.18 | 13.17 | 13.18 | 0.01 | 10.01 | 10.00 | 10.01 | 10.01 | 0.01 |
| Sorafenib | 13.02 | 13.03 | 13.02 | 13.02 | 0.01 | 9.88 | 9.88 | 9.88 | 9.88 | 0.00 |
| Sunitinib | 8.25 | 8.20 | 8.20 | 8.22 | 0.03 | 6.62 | 6.59 | 6.64 | 6.62 | 0.03 |
| Talazoparib | 7.87 | 7.82 | 7.81 | 7.83 | 0.03 | 6.46 | 6.43 | 6.49 | 6.46 | 0.03 |
| Tamoxifen | 11.79 | 11.81 | 11.83 | 11.81 | 0.02 | 9.00 | 9.00 | 9.00 | 9.00 | 0.00 |
| Thalidomide | 5.07 | 5.08 | 5.04 | 5.06 | 0.02 | 4.55 | 4.55 | 4.55 | 4.55 | 0.00 |
| Tivozanib | 9.47 | 9.46 | 9.48 | 9.47 | 0.01 | 7.47 | 7.44 | 7.45 | 7.45 | 0.02 |
| Trametinib | 12.78 | 12.79 | 12.78 | 12.78 | 0.01 | 9.75 | 9.75 | 9.75 | 9.75 | 0.00 |
| Trifluridine | 1.32 | 1.25 | 1.31 | 1.29 | 0.04 | 1.27 | 1.34 | 1.29 | 1.30 | 0.04 |
| Tucatinib | 6.77 | 6.69 | 6.68 | 6.71 | 0.05 | 5.57 | 5.57 | 5.63 | 5.59 | 0.03 |
| Vandetanib | 6.38 | 6.32 | 6.30 | 6.33 | 0.04 | 5.34 | 5.34 | 5.39 | 5.36 | 0.03 |
| Vemurafenib | 13.10 | 13.11 | 13.10 | 13.10 | 0.01 | 9.95 | 9.94 | 9.95 | 9.95 | 0.01 |
| Venetoclax | 12.37 | 12.38 | 12.39 | 12.38 | 0.01 | 9.37 | 9.36 | 9.36 | 9.36 | 0.01 |
| Vinorelbine | 8.25 | 8.21 | 8.22 | 8.23 | 0.02 | 6.53 | 6.50 | 6.56 | 6.53 | 0.03 |
| Vismodegib | 9.68 | 9.65 | 9.67 | 9.67 | 0.02 | 7.72 | 7.70 | 7.71 | 7.71 | 0.01 |
| Zanubrutinib | 10.98 | 10.98 | 10.99 | 10.98 | 0.01 | 8.54 | 8.54 | 8.53 | 8.54 | 0.01 |
| Δ4-abiraterone | 11.33 | 11.33 | 11.34 | 11.33 | 0.01 | 8.93 | 8.92 | 8.92 | 8.92 | 0.01 |

RT = Retention time

MeOH = Methanol

**Supplementary Table 5.** Overview of predicted and measured retention times and their differences for all 78 compounds at two validation gradients using the regression-based approach and artificial neural network (architecture 1:13:78) and the final optimum gradient (4.91% MeOH/min) using the regression-based approach.

|  | **Validation gradient 1 (5.33% MeOH/min)** | | | | | **Validation gradient 2 (2.51% MeOH/ min)** | | | | | **Final gradient (4.91% MeOH/ min)** | | |
| --- | --- | --- | --- | --- | --- | --- | --- | --- | --- | --- | --- | --- | --- |
| **Oral antitumor drug** | Measured RT [min] | **Regression-based approach** | | **ANN** | | Measured RT [min] | **Regression-based approach** | | **ANN** | | Measured RT [min] | **Regression-based approach** | |
| Predicted RT [min] | Difference between measured and predicted RT [%] | Predicted RT [min] | Difference between measured and predicted RT [%] | Predicted RT [min] | Difference between measured and predicted RTs [%] | Predicted RT [min] | Difference between measured and predicted RTs [%] | Predicted RT [min] | Difference between measured and predicted RTs [%] |
| Abemaciclib | 6.99 | 7.10 | 1.55 | 6.96 | -0.36 | 10.20 | 10.44 | 2.33 | 9.99 | -2.00 | 7.33 | 7.41 | 1.08 |
| Abiraterone | 12.83 | 12.99 | 1.21 | 12.93 | 0.74 | 21.34 | 21.77 | 1.99 | 21.62 | 1.31 | 13.63 | 13.75 | 0.87 |
| Afatinib | 6.49 | 6.58 | 1.32 | 6.52 | 0.38 | 9.20 | 9.38 | 1.92 | 9.30 | 1.07 | 6.80 | 6.84 | 0.58 |
| Alectinib | 9.82 | 9.99 | 1.67 | 9.90 | 0.75 | 16.23 | 16.79 | 3.36 | 16.52 | 1.78 | 10.36 | 10.57 | 1.99 |
| Anagrelide | 8.07 | 8.12 | 0.66 | 8.10 | 0.36 | 11.45 | 11.44 | -0.12 | 11.47 | 0.17 | 8.42 | 8.43 | 0.12 |
| Anastrazole | 8.21 | 8.32 | 1.32 | 8.26 | 0.64 | 12.39 | 12.64 | 2.00 | 12.50 | 0.94 | 8.59 | 8.71 | 1.38 |
| Apalutamide | 11.59 | 11.76 | 1.42 | 11.68 | 0.78 | 19.38 | 19.86 | 2.43 | 19.70 | 1.65 | 12.21 | 12.45 | 1.93 |
| Axitinib | 8.45 | 8.58 | 1.48 | 8.51 | 0.64 | 12.96 | 13.29 | 2.51 | 13.10 | 1.10 | 8.88 | 9.00 | 1.33 |
| Bicalutamide | 10.92 | 11.07 | 1.36 | 11.00 | 0.74 | 17.97 | 18.39 | 2.30 | 18.24 | 1.53 | 11.50 | 11.71 | 1.79 |
| Binimetinib | 9.24 | 9.34 | 1.07 | 9.30 | 0.60 | 14.17 | 14.39 | 1.53 | 14.31 | 1.02 | 9.69 | 9.80 | 1.12 |
| Bosutinib | 7.93 | 8.05 | 1.45 | 8.00 | 0.88 | 12.03 | 12.31 | 2.30 | 12.18 | 1.28 | 8.34 | 8.44 | 1.18 |
| Brigatinib | 6.19 | 6.28 | 1.43 | 6.21 | 0.24 | 8.79 | 9.01 | 2.48 | 8.88 | 1.09 | 6.48 | 6.53 | 0.77 |
| Cabozantinib | 10.48 | 10.64 | 1.50 | 10.56 | 0.79 | 17.61 | 18.17 | 3.08 | 17.93 | 1.82 | 11.06 | 11.29 | 2.04 |
| Ceritinib | 11.78 | 11.97 | 1.59 | 11.88 | 0.88 | 20.32 | 20.90 | 2.79 | 20.67 | 1.74 | 12.47 | 12.73 | 2.04 |
| Cobimetinib | 10.53 | 10.68 | 1.37 | 10.63 | 0.89 | 17.39 | 17.80 | 2.30 | 17.67 | 1.62 | 11.11 | 11.30 | 1.68 |
| Crizotinib | 6.53 | 6.64 | 1.66 | 6.57 | 0.58 | 9.50 | 9.76 | 2.66 | 9.61 | 1.13 | 6.85 | 6.93 | 1.15 |
| Dabrafenib | 12.24 | 12.43 | 1.50 | 12.34 | 0.78 | 20.93 | 21.50 | 2.67 | 21.28 | 1.69 | 12.95 | 13.20 | 1.89 |
| Dacomitinib | 6.82 | 6.93 | 1.59 | 6.86 | 0.57 | 9.96 | 10.23 | 2.67 | 10.18 | 2.21 | 7.15 | 7.24 | 1.24 |
| Darolutamide | 10.16 | 10.29 | 1.30 | 10.23 | 0.76 | 16.39 | 16.83 | 2.61 | 16.63 | 1.49 | 10.66 | 10.86 | 1.84 |
| Dasatinib | 8.10 | 8.22 | 1.46 | 8.16 | 0.70 | 12.46 | 12.77 | 2.40 | 12.61 | 1.17 | 8.50 | 8.63 | 1.51 |
| Duvelisib | 9.35 | 9.46 | 1.16 | 9.41 | 0.69 | 14.40 | 14.66 | 1.80 | 14.54 | 1.00 | 9.82 | 9.92 | 1.01 |
| Encorafenib | 10.41 | 10.56 | 1.42 | 10.48 | 0.70 | 17.08 | 17.56 | 2.75 | 17.36 | 1.63 | 11.00 | 11.16 | 1.43 |
| Endoxifen | 11.07 | 11.23 | 1.40 | 11.17 | 0.87 | 18.84 | 19.37 | 2.75 | 19.20 | 1.90 | 10.70 | 11.93 | 10.31 |
| Entrectinib | 10.50 | 10.67 | 1.56 | 10.60 | 0.89 | 17.68 | 18.23 | 3.04 | 17.99 | 1.75 | 11.09 | 11.31 | 1.95 |
| Enzalutamide | 11.28 | 11.43 | 1.31 | 11.37 | 0.76 | 18.84 | 19.34 | 2.57 | 19.15 | 1.63 | 11.88 | 12.11 | 1.90 |
| Erlotinib | 8.45 | 8.59 | 1.59 | 8.51 | 0.65 | 13.24 | 13.64 | 2.91 | 13.46 | 1.64 | 8.87 | 9.03 | 1.77 |
| Fedratinib | 6.00 | 6.11 | 1.85 | 6.03 | 0.60 | 8.67 | 8.97 | 3.38 | 8.75 | 0.99 | 6.26 | 6.37 | 1.73 |
| Gefitinib | 5.55 | 5.59 | 0.78 | 5.57 | 0.39 | 7.40 | 7.43 | 0.36 | 7.48 | 1.03 | 5.83 | 5.77 | -1.04 |
| Gilteritinib | 6.66 | 6.79 | 1.96 | 6.70 | 0.70 | 9.87 | 10.21 | 3.30 | 9.98 | 1.12 | 6.97 | 7.10 | 1.83 |
| Glasgedib | 7.29 | 7.40 | 1.44 | 7.34 | 0.68 | 10.77 | 11.00 | 2.06 | 10.87 | 0.93 | 7.64 | 7.73 | 1.16 |
| Hydroxy-dabrafenib | 10.18 | 10.32 | 1.39 | 10.25 | 0.74 | 16.65 | 17.14 | 2.84 | 16.90 | 1.46 | 10.73 | 10.92 | 1.74 |
| Ibrutinib | 12.67 | 12.86 | 1.50 | 12.77 | 0.81 | 21.69 | 22.26 | 2.55 | 22.05 | 1.65 | 13.42 | 13.66 | 1.76 |
| Idelalisib | 9.84 | 9.96 | 1.17 | 9.90 | 0.56 | 15.53 | 15.87 | 2.16 | 15.71 | 1.18 | 10.35 | 10.48 | 1.24 |
| Imatinib | 7.20 | 7.32 | 1.59 | 7.24 | 0.51 | 10.67 | 10.93 | 2.38 | 10.78 | 1.01 | 7.56 | 7.65 | 1.18 |
| Lapatinib | 10.05 | 10.19 | 1.37 | 10.14 | 0.87 | 16.48 | 16.96 | 2.81 | 16.79 | 1.84 | 10.64 | 10.78 | 1.30 |
| Larotrectinib | 9.66 | 9.79 | 1.29 | 9.73 | 0.71 | 15.34 | 15.73 | 2.48 | 15.55 | 1.36 | 10.15 | 10.31 | 1.55 |
| Lenalidomide | 1.24 | 1.34 | 7.71 | 2.16 | 74.90 | 1.79 | 1.60 | -11.88 | 3.45 | 92.94 | 1.84 | 1.38 | -33.33 |
| Lenvatinib | 6.85 | 6.96 | 1.63 | 6.88 | 0.56 | 9.92 | 10.16 | 2.36 | 10.01 | 0.90 | 7.16 | 7.26 | 1.38 |
| Letrozole | 8.04 | 8.13 | 1.11 | 8.08 | 0.48 | 11.87 | 12.02 | 1.25 | 11.95 | 0.66 | 8.40 | 8.49 | 1.06 |
| Lorlatinib | 6.54 | 6.62 | 1.26 | 6.56 | 0.38 | 9.18 | 9.33 | 1.57 | 9.25 | 0.72 | 6.82 | 6.88 | 0.87 |
| Midostaurin | 14.07 | 14.27 | 1.38 | 14.25 | 1.22 | 24.89 | 25.56 | 2.61 | 26.18 | 5.19 | 14.95 | 15.22 | 1.77 |
| N-desmethyl enzalutamide | 10.84 | 10.99 | 1.36 | 10.92 | 0.70 | 17.88 | 18.32 | 2.40 | 18.14 | 1.47 | 11.41 | 11.62 | 1.81 |
| Neratinib | 7.69 | 7.82 | 1.71 | 7.72 | 0.44 | 11.77 | 12.13 | 2.97 | 11.88 | 0.93 | 8.08 | 8.20 | 1.46 |
| Nilotinib | 10.25 | 10.41 | 1.50 | 10.32 | 0.67 | 16.88 | 17.37 | 2.82 | 17.14 | 1.55 | 10.84 | 11.01 | 1.54 |
| Nintedanib | 10.22 | 10.39 | 1.60 | 10.31 | 0.87 | 17.22 | 17.78 | 3.17 | 17.52 | 1.76 | 10.80 | 11.03 | 2.09 |
| Niraparib | 6.59 | 6.69 | 1.54 | 6.64 | 0.84 | 9.54 | 9.78 | 2.45 | 9.62 | 0.82 | 6.89 | 6.98 | 1.29 |
| N-oxid sorafenib | 13.13 | 13.34 | 1.60 | 13.20 | 0.59. | 22.83 | 23.46 | 2.69 | 23.23 | 1.76 | 13.90 | 14.19 | 2.04 |
| Olaparib | 8.87 | 9.02 | 1.66 | 8.93 | 0.66 | 13.97 | 14.40 | 3.01 | 14.17 | 1.48 | 9.30 | 9.49 | 2.00 |
| Osimertinib | 7.51 | 7.65 | 1.79 | 7.56 | 0.64 | 11.42 | 11.77 | 2.97 | 11.53 | 1.01 | 7.89 | 8.02 | 1.62 |
| Palbociclib | 7.25 | 7.36 | 1.49 | 7.30 | 0.67 | 10.76 | 11.04 | 2.51 | 10.87 | 1.01 | 7.60 | 7.70 | 1.30 |
| Pazopanib | 7.56 | 7.69 | 1.73 | 7.61 | 0.67 | 11.72 | 12.11 | 3.25 | 11.74 | 1.21 | 7.92 | 8.08 | 1.98 |
| Pemigatinib | 7.02 | 7.14 | 1.63 | 7.05 | 0.39 | 10.32 | 10.55 | 2.21 | 10.44 | 0.70 | 7.36 | 7.45 | 1.21 |
| Pomalidomide | 4.87 | 4.89 | 0.41 | 4.87 | 0.00 | 6.10 | 5.91 | -3.21 | 6.10 | -0.04 | 5.13 | 4.99 | -2.81 |
| Ponatinib | 11.09 | 11.26 | 1.48 | 11.18 | 0.83 | 19.06 | 19.63 | 2.90 | 19.43 | 1.95 | 11.74 | 11.97 | 1.92 |
| Pralsetinib | 9.67 | 9.83 | 1.59 | 9.73 | 0.61 | 15.90 | 16.43 | 3.25 | 16.19 | 1.84 | 10.20 | 10.40 | 1.92 |
| Regorafenib | 14.24 | 14.43 | 1.34 | 14.30 | 0.45 | 25.21 | 25.87 | 2.56 | 26.03 | 3.26 | 15.10 | 15.36 | 1.69 |
| Ribociclib | 5.20 | 5.25 | 0.95 | 5.21 | 0.23 | 7.04 | 7.13 | 1.22 | 7.13 | 1.26 | 5.45 | 5.43 | -0.37 |
| Rucaparib | 5.60 | 5.64 | 0.71 | 5.61 | 0.15 | 7.54 | 7.57 | 0.44 | 7.59 | 0.76 | 5.84 | 5.83 | -0.17 |
| Ruxolitinib | 7.95 | 8.04 | 1.08 | 8.00 | 0.58 | 11.64 | 11.80 | 1.38 | 11.71 | 0.65 | 8.32 | 8.39 | 0.83 |
| Selpercatinib | 8.11 | 8.26 | 1.82 | 8.15 | 0.46 | 12.76 | 13.19 | 3.23 | 12.96 | 1.58 | 8.51 | 8.70 | 2.18 |
| Selumetinib | 10.39 | 10.50 | 1.05 | 10.46 | 0.64 | 16.58 | 16.88 | 1.80 | 16.79 | 1.30 | 10.93 | 11.07 | 1.26 |
| Sonidegib | 14.10 | 14.30 | 1.42 | 14.18 | 0.60 | 24.78 | 25.40 | 2.44 | 25.20 | 1.71 | 14.98 | 15.23 | 1.64 |
| Sorafenib | 13.94 | 14.16 | 1.58 | 14.03 | 0.67 | 24.61 | 25.28 | 2.64 | 25.06 | 1.80 | 14.77 | 15.09 | 2.12 |
| Sunitinib | 8.66 | 8.80 | 1.59 | 8.72 | 0.73 | 13.66 | 14.04 | 2.73 | 13.88 | 1.66 | 9.10 | 9.26 | 1.73 |
| Talazoparib | 8.21 | 8.31 | 1.20 | 8.26 | 0.56 | 12.27 | 12.48 | 1.68 | 12.37 | 0.80 | 8.58 | 8.69 | 1.27 |
| Tamoxifen | 12.62 | 12.83 | 1.64 | 12.71 | 0.73 | 22.16 | 22.79 | 2.75 | 22.58 | 1.89 | 13.37 | 13.67 | 2.19 |
| Thalidomide | 5.24 | 5.24 | 0.06 | 5.24 | 0.15 | 6.60 | 6.45 | -2.38 | 6.62 | 0.28 | 5.47 | 5.36 | -2.05 |
| Tivozanib | 10.07 | 10.23 | 1.60 | 10.14 | 0.72 | 16.69 | 17.23 | 3.13 | 16.99 | 1.80 | 10.63 | 10.83 | 1.85 |
| Trametinib | 13.66 | 13.87 | 1.51 | 13.75 | 0.63 | 23.87 | 24.52 | 2.64 | 24.30 | 1.78 | 14.47 | 14.77 | 2.03 |
| Trifluridine | 1.35 | 1.50 | 10.00 | 1.35 | 0.24 | 1.92 | 1.73 | -10.79 | 1.92 | -0.01 | 1.94 | 1.54 | -25.97 |
| Tucatinib | 7.01 | 7.14 | 1.77 | 7.05 | 0.57 | 10.46 | 10.79 | 3.03 | 10.55 | 0.83 | 7.35 | 7.47 | 1.61 |
| Vandetanib | 6.59 | 6.69 | 1.49 | 6.62 | 0.53 | 9.44 | 9.63 | 2.01 | 9.53 | 0.99 | 6.90 | 6.96 | 0.86 |
| Vemurafenib | 14.02 | 14.24 | 1.52 | 14.20 | 1.24 | 24.74 | 25.41 | 2.64 | 26.03 | 5.19 | 14.86 | 15.18 | 2.11 |
| Venetoclax | 13.26 | 13.48 | 1.66 | 13.33 | 0.54 | 23.72 | 24.43 | 2.91 | 24.18 | 1.95 | 14.11 | 14.39 | 1.95 |
| Vinorelbine | 8.70 | 8.86 | 1.84 | 8.80 | 1.18 | 14.28 | 14.84 | 3.75 | 14.63 | 2.41 | 9.21 | 9.38 | 1.81 |
| Vismodegib | 10.23 | 10.35 | 1.16 | 10.30 | 0.64 | 16.29 | 16.6 | 1.89 | 16.47 | 1.10 | 10.77 | 10.91 | 1.28 |
| Zanubrutinib | 11.71 | 11.88 | 1.43 | 11.80 | 0.79 | 19.83 | 20.40 | 2.79 | 20.17 | 1.72 | 12.36 | 12.61 | 1.98 |
| Δ4-abiraterone | 12.04 | 12.19 | 1.23 | 12.13 | 0.77 | 19.72 | 20.18 | 2.26 | 20.01 | 1.45 | 12.75 | 12.89 | 1.09 |
| Mean difference [%] ±SD |  |  | **1.60 ± 1.24** |  | **1.59 ± 8.41** |  |  | **1.95 ± 2.42** |  | **2.56 ± 10.40** |  |  | **0.67 ± 5.16** |

RT = Retention time

MeOH = Methanol

| **Supplementary Table 6.** Validation results for intraday and interday accuracy, matrix effect, mean recovery, mean process efficiency, carry over, selectivity, sensitivity and dilution integrity of all 78 compounds following EMA and FDA guidelines [1, 2]. | | | | | | | | | | | | | |
| --- | --- | --- | --- | --- | --- | --- | --- | --- | --- | --- | --- | --- | --- |
| **Oral antitumor drug** | **Validation standard** | **Intraday accuracy and precision** | | **Interday accuracy and precision** | | **Mean matrix effect** | **Mean recovery** | **Mean process efficiency** | **Carry over** | **Selectivity** | **Sensitivity** | **Dilution integrity** | |
| Accuracy [%] | CV [%] | Accuracy [%] | CV [%] | [%] | [%] | [%] | [%] | [%] | [%] | 2-fold cmax | Dilution |
| Abemaciclib | LLOV  LOV  MOV  ULOV | 113.22  105.45  103.38  102.02 | 2.04  4.12  2.60  2.89 | 106.27  99.66  102.17  100.78 | 0.75  1.38  1.33  1.48 | 1386.38 | 95.40 | 1396.61 | 5.30 | n/a | 1.60 | 85.76 | 87.00 |
| Abiraterone | LLOV  LOV  MOV  ULOV | 109.08  108.20  100.97  102.32 | 7.18  4.71  2.82  2.14 | 104.35  102.46  101.92  101.48 | 1.72  1.09  0.77  0.40 | 2.30 | 93.18 | 95.31 | n/a | n/a | n/a | 101.34 | 99.20 |
| Afatinib | LLOV  LOV  MOV  ULOV | 114.91  98.23  103.18  98.73 | 14.37  8.38  7.05  2.53 | 102.88  103.86  105.01  99.52 | 4.06  3.45  2.23  0.81 | -2.65 | 96.92 | 94.37 | n/a | n/a | n/a | 92.58 | 102.85 |
| Alectinib | LLOV  LOV  MOV  ULOV | 97.89  100.92  102.77  101.11 | 2.69  3.37  2.37  2.60 | 98.83  100.01  103.45  100.49 | 0.82  0.93  0.53  0.75 | 0.44 | 96.85 | 97.30 | n/a | n/a | n/a | 93.63 | 95.44 |
| Anagrelide | LLOV  LOV  MOV  ULOV | 100.11  106.16  103.15  100.35 | 10.56  6.24  1.32  3.23 | 94.43  101.93  102.39  99.13 | 4.24  1.13  1.42  0.65 | 11.55 | 94.65 | 103.91 | n/a | 19.06 | n/a | 91.44 | 100.40 |
| Anastrazole | LLOV  LOV  MOV  ULOV | 103.99  100.20  101.51  102.82 | 6.10  1.23  3.42  2.14 | 104.34  99.37  100.93  100.92 | 1.73  0.68  0.97  1.10 | 1.01 | 96.91 | 97.80 | n/a | n/a | n/a | 87.68 | 87.44 |
| Apalutamide | LLOV  LOV  MOV  ULOV | 100.51  100.46  100.63  101.09 | 4.20  2.07  2.04  1.28 | 101.89  99.80  101.81  101.90 | 1.12  0.52  0.55  0.19 | 1.55 | 96.11 | 97.49 | n/a | n/a | n/a | 97.55 | 97.55 |
| Axitinib | LLOV  LOV  MOV  ULOV | 107.80  105.64  93.38  94.22 | 10.05  9.97  9.01  4.19 | 101.45  100.12  104.14  103.54 | 2.30  1.82  1.76  0.76 | 5.03 | 119.12 | 109.60 | n/a | n/a | n/a | 88.64 | 89.62 |
| Bicalutamide | LLOV  LOV  MOV  ULOV | 86.28  104.90  105.19  93.98 | 3.58  2.55  2.38  2.57 | 85.63  109.03  108.54  94.20 | 2.79  0.43  0.70  0.67 | 2.32 | 95.85 | 98.03 | n/a | n/a | n/a | 85.36 | 105.43 |
| Binimetinib | LLOV  LOV  MOV  ULOV | 96.50  103.04  99.81  103.50 | 7.33  2.88  3.94  3.29 | 104.08  101.35  101.66  101.81 | 2.77  1.06  0.84  0.91 | -10.01 | 102.30 | 91.84 | n/a | n/a | n/a | 85.84 | 88.49 |
| Bosutinib | LLOV  LOV  MOV  ULOV | 114.93  112.53  109.43  114.79 | 6.54  8.33  3.66  2.19 | 105.70  96.86  100.68  106.10 | 2.41  3.51  2.60  1.75 | 436.82 | 101.49 | 535.48 | 0.60 | n/a | n/a | 91.95 | 85.39 |
| Brigatinib | LLOV  LOV  MOV  ULOV | 111.60  103.49  102.88  103.25 | 3.93  3.95  1.68  1.84 | 104.97  98.44  102.71  101.99 | 1.19  1.08  0.63  0.41 | 2.15 | 97.97 | 100.00 | n/a | n/a | n/a | 92.65 | 94.01 |
| Cabozantinib | LLOV  LOV  MOV  ULOV | 98.04  99.50  103.00  100.14 | 2.59  2.59  3.01  2.36 | 99.50  98.84  103.78  99.95 | 0.66  0.49  0.72  0.48 | -0.24 | 95.41 | 95.12 | 2.07 | n/a | n/a | n/a | 97.70 |
| Ceritinib | LLOV  LOV  MOV  ULOV | 104.14  104.74  107.07  104.16 | 1.65  5.75  4.58  2.87 | 104.11  100.69  103.95  101.74 | 0.27  1.80  1.36  0.81 | 1.77 | 96.40 | 98.07 | n/a | n/a | n/a | 90.40 | 90.65 |
| Cobimetinib | LLOV  LOV  MOV  ULOV | 102.50  100.53  101.58  101.44 | 3.87  3.93  3.43  1.81 | 104.31  99.84  103.19  102.11 | 1.05  1.21  1.00  0.44 | -0.34 | 96.06 | 95.73 | n/a | n/a | n/a | 86.29 | 87.66 |
| Crizotinib | LLOV  LOV  MOV  ULOV | 97.21  100.54  103.35  99.86 | 5.76  5.36  2.20  1.69 | 98.06  100.62  105.58  98.79 | 1.94  1.61  0.44  0.47 | 3.87 | 96.14 | 99.90 | n/a | n/a | n/a | 90.83 | 97.71 |
| Dabrafenib | LLOV  LOV  MOV  ULOV | 98.86  100.43  96.20  99.78 | 5.56  2.32  3.40  3.58 | 102.74  102.28  104.23  103.19 | 2.14  0.77  0.96  1.05 | 0.05 | 97.06 | 97.15 | n/a | n/a | n/a | 108.53 | 106.13 |
| Dacomitinib | LLOV  LOV  MOV  ULOV | 107.99  106.38  102.68  102.14 | 9.78  5.65  2.67  2.68 | 102.28  100.78  102.67  99.70 | 2.53  1.79  0.64  0.59 | 4.02 | 105.52 | 110.79 | n/a | n/a | n/a | 95.09 | 97.85 |
| Darolutamide | LLOV  LOV  MOV  ULOV | 99.88  98.88  100.46  100.23 | 3.00  1.73  3.16  1.43 | 99.82  98.70  102.65  100.39 | 0.97  0.45  0.91  0.18 | 2.17 | 96.93 | 99.01 | n/a | n/a | n/a | 90.96 | 88.93 |
| Dasatinib | LLOV  LOV  MOV  ULOV | 112.06  109.44  101.44  100.60 | 11.49  5.21  4.04  3.94 | 99.81  100.09  101.55  100.48 | 2.76  1.36  1.11  0.91 | -1.93 | 96.81 | 92.13 | 7.21 | n/a | n/a | 89.28 | 92.13 |
| Duvelisib | LLOV  LOV  MOV  ULOV | 103.03  101.57  100.93  103.08 | 3.97  1.58  3.15  3.00 | 105.67  100.15  101.24  102.03 | 1.21  0.45  0.83  0.93 | -0.77 | 96.90 | 96.16 | n/a | n/a | n/a | 89.18 | 88.57 |
| Encorafenib | LLOV  LOV  MOV  ULOV | 98.59  103.91  102.37  101.13 | 5.53  5.97  3.39  2.92 | 94.45  100.02  104.06  100.98 | 2.91  1.54  0.74  0.40 | 2.09 | 98.22 | 100.28 | n/a | n/a | n/a | 98.56 | 94.17 |
| Endoxifen | LLOV  LOV  MOV  ULOV | 97.51  102.08  100.08  101.11 | 5.21  2.77  1.77  1.80 | 99.64  100.80  101.72  100.65 | 1.85  0.65  0.23  0.53 | -1.52 | 97.51 | 96.00 | n/a | n/a | n/a | 100.64 | 101.51 |
| Entrectinib | LLOV  LOV  MOV  ULOV | 89.51  104.68  103.96  94.87 | 4.85  0.84  4.92  5.58 | 91.68  101.41  105.76  95.70 | 0.99  0.82  1.66  2.13 | 0.13 | 97.48 | 97.57 | n/a | n/a | 17.92 | 88.28 | 96.30 |
| Enzalutamide | LLOV  LOV  MOV  ULOV | 94.76  98.42  101.92  99.60 | 4.34  2.09  2.64  1.52 | 97.23  98.69  102.93  99.04 | 1.28  0.38  0.70  0.32 | 2.52 | 95.76 | 98.14 | n/a | n/a | n/a | 93.58 | 99.05 |
| Erlotinib | LLOV  LOV  MOV  ULOV | 100.95  101.29  100.53  103.69 | 5.12  1.57  2.10  3.83 | 104.14  99.60  100.72  100.66 | 1.77  0.47  0.45  1.39 | -0.91 | 96.71 | 95.75 | n/a | n/a | 0.10 | 87.51 | 88.29 |
| Fedratinib | LLOV  LOV  MOV  ULOV | 106.81  110.79  109.69  112.79 | 8.53  4.90  4.56  8.48 | 93.78  104.51  107.56  98.71 | 3.42  1.22  1.61  3.68 | -3.54 | 98.07 | 94.60 | n/a | n/a | 0.07 | 71.17 | 94.22 |
| Gefitinib | LLOV  LOV  MOV  ULOV | 101.56  100.18  104.63  100.51 | 2.21  4.60  3.46  2.62 | 101.57  99.56  103.33  98.71 | 0.71  1.43  1.32  0.88 | 3.41 | 95.96 | 99.22 | n/a | n/a | n/a | 87.60 | 91.57 |
| Gilteritinib | LLOV  LOV  MOV  ULOV | 103.38  106.88  101.73  99.14 | 2.72  1.04  0.71  4.81 | 102.30  102.50  108.99  102.18 | 0.37  0.54  0.69  1.33 | 80.52 | 100.16 | 180.46 | n/a | n/a | n/a | 77.97 | 86.89 |
| Glasgedib | LLOV  LOV  MOV  ULOV | 99.53  102.53  101.56  99.75 | 3.94  3.51  2.50  0.84 | 97.40  100.36  103.19  98.81 | 0.98  1.17  0.63  0.45 | -1.86 | 97.82 | 96.02 | n/a | n/a | n/a | 91.40 | 97.84 |
| Hydroxy-dabrafenib | LLOV  LOV  MOV  ULOV | 92.66  93.97  95.96  101.34 | 9.15  5.62  5.06  6.61 | 104.20  97.57  104.30  103.47 | 3.28  1.81  1.19  1.67 | -0.66 | 94.52 | 93.99 | n/a | n/a | n/a | 88.19 | 94.31 |
| Ibrutinib | LLOV  LOV  MOV  ULOV | 95.66  102.22  100.90  102.89 | 5.61  4.00  1.93  1.67 | 101.57  101.72  101.15  101.40 | 1.59  0.99  0.43  0.62 | 3.54 | 93.41 | 96.57 | n/a | n/a | n/a | 101.96 | 102.13 |
| Idelalisib | LLOV  LOV  MOV  ULOV | 106.08  100.78  99.77  104.96 | 4.10  3.50  2.40  2.61 | 106.88  100.01  100.98  103.08 | 1.25  1.14  0.57  0.52 | 0.68 | 96.83 | 97.50 | n/a | n/a | n/a | 93.02 | 88.70 |
| Imatinib | LLOV  LOV  MOV  ULOV | 97.92  103.68  102.86  99.17 | 8.00  2.33  1.30  1.94 | 98.21  103.83  103.87  98.98 | 2.28  0.58  0.99  0.54 | 116.98 | 96.23 | 206.95 | n/a | n/a | n/a | 72.42 | 90.60 |
| Lapatinib | LLOV  LOV  MOV  ULOV | 106.43  104.26  101.37  101.23 | 5.16  3.35  3.47  2.70 | 104.68  99.05  102.69  101.88 | 1.37  0.78  0.44  0.87 | -8.14 | 95.46 | 87.51 | 4.70 | n/a | 2.15 | 93.74 | 92.38 |
| Larotrectinib | LLOV  LOV  MOV  ULOV | 94.02  96.80  98.24  98.95 | 3.40  2.75  2.17  3.14 | 100.10  100.05  102.65  101.57 | 2.31  1.90  0.35  0.82 | 1.02 | 94.03 | 94.85 | n/a | n/a | n/a | 95.46 | 93.58 |
| Lenalidomide | LLOV  LOV  MOV  ULOV | 111.81  86.39  103.51  98.81 | 6.26  7.29  5.00  1.79 | 111.74  86.16  104.08  98.10 | 1.38  3.56  1.11  0.25 | 62.86 | 82.76 | 152.65 | n/a | n/a | n/a | 91.23 | 95.15 |
| Lenvatinib | LLOV  LOV  MOV  ULOV | 104.70  103.48  101.00  103.14 | 5.34  1.40  4.00  2.18 | 106.00  101.02  101.24  101.24 | 1.39  0.74  1.30  0.41 | -1.17 | 98.11 | 96.97 | n/a | n/a | n/a | 92.43 | 91.42 |
| Letrozole | LLOV  LOV  MOV  ULOV | 107.41  102.62  99.37  102.78 | 4.06  2.96  2.66  1.72 | 104.52  98.67  99.41  100.14 | 0.58  0.87  0.60  0.97 | -1.16 | 98.62 | 97.55 | n/a | n/a | n/a | 90.81 | 88.70 |
| Lorlatinib | LLOV  LOV  MOV  ULOV | 101.19  100.17  100.36  100.86 | 4.78  2.99  2.28  1.57 | 102.83  100.43  102.91  100.30 | 1.38  0.76  0.38  0.34 | 1.14 | 95.23 | 96.32 | n/a | n/a | n/a | 92.31 | 94.31 |
| Midostaurin | LLOV  LOV  MOV  ULOV | 104.04  110.64  101.65  105.73 | 8.12  10.68  3.47  2.84 | 106.20  103.14  102.09  100.08 | 2.00  3.67  1.14  1.14 | 117.87 | 101.57 | 219.95 | n/a | n/a | n/a | 103.31 | 101.61 |
| N-desmethyl enzalutamide | LLOV  LOV  MOV  ULOV | 97.37  98.28  100.84  101.10 | 3.30  2.23  2.52  3.03 | 101.59  98.73  101.80  102.02 | 0.85  0.77  0.99  1.02 | 3.59 | 95.28 | 98.79 | n/a | n/a | n/a | 94.41 | 96.03 |
| Neratinib | LLOV  LOV  MOV  ULOV | 111.20  107.18  105.35  104.12 | 12.20  5.38  6.22  2.59 | 99.29  98.79  103.87  100.38 | 3.51  1.95  2.02  0.68 | 39.63 | 103.79 | 140.37 | n/a | n/a | n/a | 95.70 | 102.53 |
| Nilotinib | LLOV  LOV  MOV  ULOV | 104.83  101.15  101.94  102.88 | 2.97  3.42  1.76  2.49 | 105.82  99.59  103.78  101.94 | 0.58  0.96  0.69  0.67 | -2.68 | 97.23 | 94.55 | n/a | n/a | n/a | 95.87 | 90.60 |
| Nintedanib | LLOV  LOV  MOV  ULOV | 90.37  100.60  101.97  96.62 | 12.23  6.48  4.58  5.07 | 105.47  100.65  103.78  99.95 | 3.20  0.79  0.82  1.32 | -2.27 | 101.00 | 98.31 | n/a | n/a | n/a | 86.66 | 85.58 |
| Niraparib | LLOV  LOV  MOV  ULOV | 100.95  100.56  101.00  99.60 | 2.52  1.64  1.60  2.00 | 101.00  100.69  103.29  99.17 | 0.63  0.62  0.46  0.61 | -1.64 | 96.86 | 95.29 | n/a | n/a | n/a | 89.42 | 94.46 |
| N-oxid sorafenib | LLOV  LOV  MOV  ULOV | 101.97  102.43  100.46  103.42 | 5.40  3.00  2.77  0.65 | 104.38  100.86  101.06  101.79 | 1.78  0.92  0.85  0.52 | 1.29 | 97.42 | 98.50 | n/a | n/a | n/a | 102.08 | 99.90 |
| Olaparib | LLOV  LOV  MOV  ULOV | 102.85  100.82  100.48  103.58 | 3.86  1.58  2.91  2.82 | 105.05  99.91  101.10  101.94 | 1.21  0.44  0.86  0.86 | 1.73 | 96.10 | 97.80 | n/a | n/a | n/a | 95.31 | 93.21 |
| Osimertinib | LLOV  LOV  MOV  ULOV | 108.62  103.80  106.91  100.22 | 3.45  4.43  3.17  3.99 | 99.64  99.83  104.36  98.42 | 1.13  1.26  0.90  1.39 | 4.97 | 97.49 | 102.56 | n/a | n/a | n/a | 79.97 | 89.44 |
| Palbociclib | LLOV  LOV  MOV  ULOV | 106.56  101.55  103.78  102.16 | 3.47  3.76  4.00  1.62 | 106.45  101.74  103.88  98.95 | 0.59  0.92  1.09  0.56 | 19.58 | 95.75 | 113.77 | n/a | n/a | 1.55 | 88.08 | 92.77 |
| Pazopanib | LLOV  LOV  MOV  ULOV | 101.37  102.52  102.34  101.98 | 3.81  2.78  1.63  2.90 | 100.02  100.41  102.29  100.03 | 1.22  0.59  0.39  0.74 | -0.53 | 96.82 | 96.32 | n/a | n/a | n/a | 94.69 | 97.54 |
| Pemigatinib | LLOV  LOV  MOV  ULOV | 103.53  101.62  100.19  99.86 | 6.03  5.14  1.18  1.72 | 103.58  100.82  102.86  99.86 | 1.31  1.70  0.62  0.41 | 1.95 | 97.45 | 99.11 | n/a | n/a | n/a | 92.19 | 95.97 |
| Pomalidomide | LLOV  LOV  MOV  ULOV | 92.85  97.30  100.72  101.19 | 12.10  2.02  2.41  2.25 | 95.45  100.07  102.14  99.35 | 2.94  2.09  1.03  0.75 | 23.94 | 94.40 | 116.93 | n/a | n/a | n/a | 91.41 | 94.80 |
| Ponatinib | LLOV  LOV  MOV  ULOV | 100.94  103.45  104.07  105.77 | 7.06  4.85  1.20  2.87 | 102.33  100.66  102.26  102.42 | 2.04  1.09  0.62  0.65 | -3.31 | 96.85 | 93.68 | n/a | n/a | n/a | 93.86 | 96.54 |
| Pralsetinib | LLOV  LOV  MOV  ULOV | 92.76  99.47  103.45  100.89 | 4.28  1.48  1.90  2.23 | 97.27  99.28  103.34  100.33 | 1.25  0.37  0.47  0.61 | -1.51 | 97.58 | 96.06 | n/a | n/a | n/a | 96.15 | 95.91 |
| Regorafenib | LLOV  LOV  MOV  ULOV | 88.36  93.93  97.66  95.33 | 14.12  5.93  6.43  6.15 | 91.78  99.03  104.40  98.56 | 4.86  1.98  2.03  1.93 | 15.53 | 101.83 | 119.85 | n/a | n/a | n/a | 91.88 | 100.91 |
| Ribociclib | LLOV  LOV  MOV  ULOV | 95.29  101.86  103.56  98.46 | 4.48  1.53  1.99  2.37 | 95.76  100.69  104.90  98.21 | 1.39  0.32  0.31  0.86 | 72.00 | 97.27 | 166.92 | n/a | n/a | 0.36 | 85.06 | 96.89 |
| Rucaparib | LLOV  LOV  MOV  ULOV | 107.80  96.83  98.24  103.19 | 3.45  5.16  1.65  2.30 | 111.88  94.13  100.88  104.70 | 1.07  1.61  0.47  0.51 | 5.29 | 99.31 | 104.75 | n/a | n/a | n/a | 107.98 | 93.26 |
| Ruxolitinib | LLOV  LOV  MOV  ULOV | 103.70  99.82  100.88  100.51 | 6.77  0.98  2.25  1.90 | 103.52  100.42  102.40  99.98 | 1.74  1.65  0.58  0.37 | 0.64 | 98.06 | 98.74 | n/a | n/a | n/a | 91.97 | 93.77 |
| Selpercatinib | LLOV  LOV  MOV  ULOV | 100.31  102.04  102.56  103.10 | 2.84  2.42  3.49  2.97 | 101.67  99.47  102.38  100.77 | 0.72  0.44  1.15  1.00 | -0.22 | 97.84 | 97.59 | n/a | n/a | n/a | 91.05 | 90.93 |
| Selumetinib | LLOV  LOV  MOV  ULOV | 86.10  104.96  104.09  101.33 | 5.14  6.09  3.59  1.33 | 98.84  103.70  103.86  101.04 | 2.95  1.42  1.27  0.38 | 4.01 | 96.11 | 99.07 | n/a | n/a | n/a | 94.59 | 95.45 |
| Sonidegib | LLOV  LOV  MOV  ULOV | 103.98  104.21  100.85  100.84 | 8.35  3.71  2.13  2.38 | 102.00  100.81  101.64  100.54 | 3.22  1.07  0.57  0.63 | 3.50 | 97.60 | 100.95 | n/a | n/a | n/a | 97.02 | 97.73 |
| Sorafenib | LLOV  LOV  MOV  ULOV | 103.19  103.96  102.19  103.68 | 3.19  3.24  2.92  1.27 | 100.66  100.45  102.18  99.99 | 1.02  1.17  0.97  0.56 | 2.44 | 96.13 | 98.49 | n/a | 3.31 | n/a | 101.03 | 96.39 |
| Sunitinib | LLOV  LOV  MOV  ULOV | 106.11  103.21  100.50  102.72 | 6.86  2.79  1.67  1.12 | 107.78  102.20  103.14  102.38 | 1.97  0.90  0.49  0.48 | -3.11 | 96.95 | 93.92 | n/a | n/a | n/a | 98.14 | 100.90 |
| Talazoparib | LLOV  LOV  MOV  ULOV | 104.90  112.17  101.69  103.47 | 8.63  7.40  2.27  2.54 | 101.72  103.91  100.77  101.51 | 2.26  2.07  0.70  1.33 | 24.47 | 89.12 | 110.32 | n/a | n/a | n/a | 85.27 | 87.70 |
| Tamoxifen | LLOV  LOV  MOV  ULOV | 108.81  110.48  104.13  104.43 | 7.10  6.13  3.65  2.22 | 104.34  102.34  101.42  101.16 | 2.31  2.22  1.24  1.11 | -2.61 | 96.51 | 93.79 | n/a | n/a | n/a | 96.86 | 94.37 |
| Thalidomide | LLOV  LOV  MOV  ULOV | 98.62  102.33  102.26  100.48 | 5.51  3.33  3.84  3.48 | 103.49  100.73  102.58  99.65 | 1.29  1.65  0.43  0.96 | 1.94 | 100.44 | 102.27 | n/a | n/a | n/a | 87.41 | 92.06 |
| Tivozanib | LLOV  LOV  MOV  ULOV | 101.30  101.53  102.64  99.75 | 4.02  4.40  3.17  1.83 | 98.77  99.08  103.37  100.82 | 1.15  1.01  0.87  0.68 | -0.31 | 95.80 | 95.43 | n/a | n/a | n/a | 94.64 | 95.57 |
| Trametinib | LLOV  LOV  MOV  ULOV | 93.30  104.18  101.87  101.67 | 7.92  2.65  3.91  4.08 | 96.78  100.61  102.25  101.75 | 1.82  1.55  0.58  1.03 | 0.43 | 94.55 | 95.02 | n/a | 1.79 | n/a | 97.04 | 98.78 |
| Trifluridine | LLOV  LOV  MOV  ULOV | 87.01  109.78  103.61  94.85 | 8.91  2.70  2.13  1.09 | 87.97  106.46  104.80  93.82 | 2.22  1.77  1.20  0.74 | 2.34 | 102.98 | 105.26 | n/a | n/a | n/a | 94.38 | 112.74 |
| Tucatinib | LLOV  LOV  MOV  ULOV | 93.88  102.09  102.82  95.87 | 4.19  2.95  1.76  0.73 | 93.24  101.66  104.74  96.27 | 0.93  0.68  0.26  0.95 | 10.55 | 96.07 | 105.98 | n/a | n/a | n/a | 90.41 | 104.94 |
| Vandetanib | LLOV  LOV  MOV  ULOV | 99.08  103.84  104.92  96.14 | 5.04  4.81  3.18  2.52 | 92.04  100.45  106.39  95.47 | 1.76  1.41  0.66  0.90 | 0.80 | 97.18 | 97.96 | n/a | n/a | n/a | 78.05 | 95.04 |
| Vemurafenib | LLOV  LOV  MOV  ULOV | 109.53  102.60  101.59  103.99 | 7.11  1.85  1.69  1.94 | 103.46  97.77  101.42  101.83 | 2.52  0.85  0.29  0.46 | 2.05 | 97.38 | 99.35 | n/a | n/a | n/a | 102.95 | 98.67 |
| Venetoclax | LLOV  LOV  MOV  ULOV | 110.72  103.22  99.35  105.44 | 1.85  3.51  3.78  2.49 | 105.49  102.30  101.66  101.90 | 3.21  1.04  1.23  0.97 | -3.68 | 100.31 | 96.83 | n/a | n/a | n/a | 99.52 | 93.77 |
| Vinorelbine | LLOV  LOV  MOV  ULOV | 108.72  91.98  102.99  103.74 | 14.01  14.18  4.65  4.33 | 97.57  102.47  100.01  98.01 | 4.90  3.16  1.06  1.73 | -14.39 | 109.84 | 88.51 | n/a | n/a | n/a | 80.97 | 86.01 |
| Vismodegib | LLOV  LOV  MOV  ULOV | 85.44  100.42  102.87  97.74 | 4.52  1.13  2.29  1.73 | 87.59  101.28  104.82  97.52 | 1.39  0.17  0.45  0.38 | 0.32 | 97.20 | 97.50 | n/a | n/a | n/a | 91.25 | 99.70 |
| Zanubrutinib | LLOV  LOV  MOV  ULOV | 100.53  101.41  98.89  100.27 | 10.64  6.37  3.70  3.22 | 99.95  102.10  101.87  99.52 | 5.88  1.46  0.77  1.16 | 1.62 | 86.79 | 87.67 | n/a | n/a | n/a | 93.98 | 93.27 |
| Δ4-abiraterone | LLOV  LOV  MOV  ULOV | 98.68  105.46  101.03  102.15 | 5.18  2.64  2.05  3.12 | 101.76  102.10  102.53  100.88 | 1.65  1.09  0.71  0.83 | -1.59 | 96.43 | 94.95 | n/a | n/a | n/a | 101.99 | 102.75 |

n/a = not available

ULOV: upper limit of validation

MOV: middle of validation limit

LOV: low limit of validation

LLOV: lower limit of validation

| **Supplementary Table 7.** Validation results for the stability tests performed with all 78 compounds. | | | | | | | | | | | | | | | | | | | |
| --- | --- | --- | --- | --- | --- | --- | --- | --- | --- | --- | --- | --- | --- | --- | --- | --- | --- | --- | --- |
| **Oral antitumor drug** | **Validation standard** | **Freeze-Thaw-stability** | | **Short-term stability (24h, 20 °C, with daylight)** | | **Short-term stability (24h, 20 °C, without daylight)** | | **Short-term stability (24h, 4 °C, without daylight)** | | **Autosampler (24h, 4 °C)** | | **Autosampler (72h, 4 °C)** | | **Fridge stability (1 week, 4 °C)** | | **Long term stability, 1 month, -20 °C** | | **Long term stability, 1 month, -80 °C** | |
| Accuracy [%] | CV [%] | Accuracy [%] | CV [%] | Accuracy [%] | CV [%] | Accuracy [%] | CV [%] | Accuracy [%] | CV [%] | Accuracy [%] | CV [%] | Accuracy [%] | CV [%] | Accuracy [%] | CV [%] | Accuracy [%] | CV [%] |
| Abemaciclib | LLOV  LOV  MOV  ULOV | 106.07  95.62  95.85  93.10 | 1.98  3.54  0.79  2.08 | 96.94  94.61  96.39  95.84 | 0.33  2.30  1.74  0.90 | 100.18  95.39  96.74  96.83 | 2.65  1.60  4.44  3.40 | 94.68  89.63  100.99  99.73 | 3.47  5.47  0.87  0.53 | 113.25  106.08  104.62  107.76 | 2.86  1.71  0.34  2.29 | 112.19  107.38  104.83  110.34 | 7.52  1.93  1.45  1.93 | 107.09  90.20  92.15  91.42 | 4.91  6.43  1.66  1.79 | 91.53  93.26  101.21  104.11 | 6.31  0.97  7.93  2.48 | 90.54  94.51  104.23  105.15 | 4.13  3.90  2.74  0.43 |
| Abiraterone | LLOV  LOV  MOV  ULOV | 112.83  99.18  93.55  92.95 | 6.00  4.49  1.64  5.41 | 94.23  98.20  97.32  97.95 | 11.34  5.42  1.43  0.64 | 100.90  99.13  97.64  100.61 | 6.31  6.17  1.40  1.24 | 88.97  93.75  97.19  97.40 | 2.20  1.95  1.07  0.87 | 113.95  105.33  99.76  102.07 | 2.42  2.98  2.17  2.64 | 110.40  109.37  101.96  103.38 | 3.86  1.33  1.11  0.80 | 105.97  104.32  99.27  99.80 | 3.11  4.60  1.65  3.53 | 77.43  93.70  101.20  102.75 | 3.94  3.62  0.41  3.27 | 79.17  89.50  104.57  101.73 | 5.03  1.65  1.16  2.42 |
| Afatinib | LLOV  LOV  MOV  ULOV | 109.37  110.66  102.54  90.57 | 14.78  12.37  2.88  0.21 | 86.70  88.08  91.49  88.36 | 7.23  10.01  0.76  1.55 | 78.10  81.12  88.80  87.79 | 20.46  2.65  5.82  3.90 | 113.60  95.88  100.48  99.91 | 5.61  12.04  4.28  4.84 | 108.78  113.83  103.75  101.90 | 4.10  14.50  3.97  5.15 | 106.76  113.08  106.34  103.06 | 5.07  5.25  2.36  1.04 | 113.07  90.50  88.48  93.02 | 15.18  20.37  3.48  5.78 | 92.53  112.18  99.66  93.32 | 14.16  3.05  2.65  4.85 | 85.98  98.27  114.87  102.58 | 31.65  9.99  2.58  4.70 |
| Alectinib | LLOV  LOV  MOV  ULOV | 89.39  102.49  104.63  98.21 | 2.07  2.36  2.18  1.98 | 93.20  94.39  99.46  96.67 | 0.87  1.48  1.23  3.59 | 94.61  96.77  98.76  99.63 | 2.09  3.01  1.67  1.65 | 96.82  100.10  100.84  98.27 | 1.38  0.56  1.66  0.58 | 96.24  100.46  100.78  98.53 | 1.42  1.25  3.95  1.24 | 99.81  103.08  102.13  103.78 | 1.71  1.37  1.79  1.93 | 99.55  98.76  98.23  98.52 | 2.64  2.05  3.10  0.80 | 85.88  93.86  102.69  98.96 | 0.11  0.71  3.16  0.85 | 83.23  95.42  100.99  101.27 | 0.91  1.86  7.35  2.20 |
| Anagrelide | LLOV  LOV  MOV  ULOV | 100.58  98.71  97.94  99.10 | 7.01  5.71  2.53  1.27 | 104.73  108.40  99.60  96.76 | 5.67  9.05  2.43  1.70 | 98.71  114.23  97.07  95.44 | 32.52  5.16  5.60  1.22 | 94.67  92.93  100.80  103.61 | 8.17  6.20  4.60  2.80 | 92.80  105.49  98.81  106.72 | 1.63  18.25  1.75  1.48 | 98.93  88.96  94.72  102.25 | 13.15  8.49  4.92  2.41 | 93.67  99.53  100.30  97.79 | 4.13  14.06  0.75  4.45 | 91.78  108.10  101.43  102.58 | 11.20  13.47  3.56  0.98 | 83.80  108.60  103.15  101.91 | 47.14  6.08  0.90  2.60 |
| Anastrazole | LLOV  LOV  MOV  ULOV | 110.20  93.68  97.04  97.98 | 3.73  2.14  1.74  2.78 | 107.84  99.48  97.68  98.42 | 0.58  4.47  4.56  2.71 | 105.85  97.86  97.84  101.41 | 5.43  6.18  2.82  3.41 | 111.12  101.19  102.09  103.36 | 3.06  4.78  1.08  1.67 | 105.67  103.13  99.88  103.42 | 4.49  3.81  3.06  2.37 | 103.90  104.49  101.85  109.68 | 1.28  3.49  0.60  2.84 | 102.38  93.62  91.89  93.81 | 3.48  1.62  0.47  0.83 | 93.29  93.74  101.93  102.89 | 0.55  5.41  1.26  1.17 | 94.61  92.85  99.02  99.66 | 7.01  1.00  1.45  2.87 |
| Apalutamide | LLOV  LOV  MOV  ULOV | 86.13  94.73  97.53  94.81 | 1.55  2.55  0.73  2.78 | 85.71  83.88  75.15  67.93 | 1.92  1.08  3.28  6.33 | 86.77  84.26  78.05  70.36 | 0.58  1.03  1.29  3.23 | 96.58  95.95  94.84  94.58 | 0.28  0.50  0.29  0.93 | 101.08  99.70  98.56  100.69 | 0.87  0.90  1.58  2.16 | 100.46  101.37  99.53  102.76 | 0.34  0.46  0.69  0.63 | 85.64  83.42  67.47  68.61 | 4.26  2.74  2.76  2.18 | 72.46  80.38  88.27  86.72 | 5.03  2.12  2.11  1.79 | 82.66  91.57  104.96  100.19 | 2.47  2.09  0.20  2.36 |
| Axitinib | LLOV  LOV  MOV  ULOV | 109.30  97.20  86.21  88.28 | 7.63  0.44  7.13  3.12 | 100.00  100.20  96.61  96.20 | 10.18  3.55  1.60  1.46 | 111.00  102.27  99.90  98.66 | 12.22  8.17  4.01  4.02 | 112.87  89.85  90.49  91.81 | 8.95  5.12  4.20  3.68 | 100.20  117.57  99.82  101.66 | 8.75  6.82  4.13  4.74 | 107.47  113.93  98.89  102.51 | 9.07  0.43  2.73  5.03 | 119.60  73.50  90.26  84.25 | 1.89  10.97  2.01  3.35 | 30.70  46.80  84.07  95.46 | 2.30  15.46  1.63  7.36 | 39.27  47.90  87.45  94.53 | 49.70  18.18  8.85  1.84 |
| Bicalutamide | LLOV  LOV  MOV  ULOV | 85.03  114.47  110.86  97.26 | 1.92  4.04  1.33  2.89 | 87.43  108.40  108.91  94.69 | 2.47  0.50  1.93  2.00 | 86.38  108.53  105.72  95.13 | 3.81  0.99  3.27  0.42 | 90.39  111.01  107.72  94.49 | 3.45  0.36  1.12  0.94 | 83.15  107.70  104.39  95.00 | 1.78  2.32  3.06  1.42 | 81.31  105.91  102.81  95.05 | 2.31  2.02  1.63  1.10 | 102.16  112.44  108.66  97.94 | 4.33  2.52  2.66  0.50 | 74.48  101.71  109.07  98.62 | 8.35  0.14  2.39  1.85 | 80.64  104.89  110.59  98.95 | 0.79  0.68  5.02  1.29 |
| Binimetinib | LLOV  LOV  MOV  ULOV | 110.59  95.13  95.20  96.61 | 5.35  1.49  2.26  2.80 | 93.57  96.63  99.79  97.88 | 5.84  5.82  1.04  5.44 | 98.33  99.96  97.19  101.17 | 6.31  6.70  6.19  2.83 | 102.89  98.62  102.39  103.60 | 6.74  5.33  2.70  4.03 | 103.02  98.66  97.25  104.87 | 4.76  0.16  4.96  3.35 | 100.77  93.92  102.40  105.87 | 12.98  3.90  1.42  1.88 | 101.60  95.42  91.45  93.94 | 11.81  7.41  2.82  2.14 | 98.72  91.72  97.91  101.44 | 8.28  3.33  2.12  2.26 | 96.87  97.19  92.40  98.06 | 18.21  6.01  8.37  1.42 |
| Bosutinib | LLOV  LOV  MOV  ULOV | 113.89  101.53  105.17  113.75 | 0.65  4.33  5.85  7.94 | 91.42  85.43  94.59  99.50 | 9.10  2.32  0.73  2.14 | 95.28  90.96  97.54  101.19 | 9.55  7.22  6.18  4.05 | 109.55  98.03  102.42  108.40 | 2.46  3.13  1.88  0.85 | 133.44  116.38  110.78  114.58 | 6.10  4.21  3.42  2.00 | 129.18  113.03  104.84  114.75 | 12.27  5.46  5.42  1.77 | 72.83  61.98  66.52  74.92 | 6.64  4.13  2.24  1.44 | 112.30  85.26  87.29  96.91 | 6.20  6.78  5.31  3.69 | 99.53  94.57  85.90  93.91 | 5.36  5.98  2.02  5.65 |
| Brigatinib | LLOV  LOV  MOV  ULOV | 100.93  90.85  96.17  92.27 | 2.59  3.04  1.29  4.04 | 98.84  94.27  96.43  96.74 | 2.59  3.35  1.75  1.46 | 98.58  92.47  96.73  98.12 | 2.30  0.36  2.67  1.77 | 97.59  93.52  99.56  101.31 | 1.16  4.03  3.21  2.94 | 114.71  107.52  103.89  109.00 | 2.87  5.03  1.40  1.92 | 116.32  106.31  104.84  110.11 | 4.86  1.66  2.82  0.48 | 103.29  63.40  74.88  91.07 | 0.63  3.15  2.72  2.47 | 95.29  92.44  104.96  105.88 | 3.78  2.28  1.55  0.31 | 93.94  94.66  109.98  105.82 | 2.75  1.57  0.81  2.45 |
| Cabozantinib | LLOV  LOV  MOV  ULOV | 95.90  98.60  100.49  96.14 | 1.85  2.23  2.67  1.79 | 99.93  99.11  102.60  99.08 | 1.48  1.41  0.73  1.55 | 100.73  98.55  99.27  100.30 | 1.80  2.14  2.15  1.67 | 99.88  99.40  103.19  98.68 | 1.76  1.86  0.95  0.27 | 99.49  100.37  102.46  99.39 | 3.31  1.91  3.02  2.54 | 103.17  102.79  106.52  104.35 | 2.70  0.44  1.57  2.23 | 106.26  102.86  101.56  100.84 | 2.33  2.60  1.40  1.20 | 85.56  91.37  103.47  99.92 | 0.95  1.62  2.60  0.72 | 85.53  94.47  102.89  101.75 | 0.25  1.48  5.96  1.49 |
| Ceritinib | LLOV  LOV  MOV  ULOV | 85.17  88.07  95.41  94.20 | 2.28  2.91  1.59  2.43 | 50.26  52.34  81.91  82.03 | 6.53  6.92  8.04  14.04 | 52.45  56.40  87.97  92.22 | 2.95  4.26  2.18  1.57 | 93.00  95.03  98.30  96.98 | 1.86  1.04  1.13  0.70 | 108.66  105.31  106.58  106.80 | 3.98  1.98  1.96  1.57 | 113.93  114.72  112.98  115.00 | 1.26  2.08  1.70  0.38 | 85.53  85.84  88.26  89.10 | 2.16  3.47  2.05  0.42 | 71.69  85.06  96.95  94.77 | 9.97  5.61  2.56  1.14 | 77.58  88.34  100.21  99.50 | 0.16  2.64  4.38  0.55 |
| Cobimetinib | LLOV  LOV  MOV  ULOV | 98.51  99.54  98.22  99.51 | 1.80  1.83  1.54  1.29 | 96.01  95.24  98.93  100.52 | 3.15  2.11  0.60  3.70 | 94.88  92.87  97.56  102.86 | 2.05  1.63  1.40  2.18 | 101.66  98.01  100.45  100.83 | 0.83  1.87  1.03  1.59 | 103.67  101.91  98.73  100.62 | 3.03  1.48  1.02  1.12 | 99.71  94.11  95.67  97.99 | 0.95  0.30  1.24  1.95 | 105.82  96.83  95.83  98.89 | 4.42  3.32  1.78  2.28 | 85.20  92.42  100.09  100.82 | 2.28  2.05  2.08  1.65 | 83.13  92.61  101.95  102.69 | 3.53  4.30  4.38  2.65 |
| Crizotinib | LLOV  LOV  MOV  ULOV | 89.13  92.87  95.94  90.62 | 1.97  1.62  1.71  3.48 | 73.15  77.03  89.09  87.08 | 14.26  7.50  6.53  9.20 | 74.32  80.14  96.44  93.79 | 3.44  7.27  1.28  3.99 | 85.88  91.80  96.32  94.50 | 2.25  1.46  1.17  2.56 | 97.94  103.53  104.42  103.90 | 2.88  2.72  2.05  0.83 | 98.27  104.94  104.13  102.39 | 3.36  0.87  2.29  2.34 | 88.08  86.74  92.00  92.15 | 1.26  3.20  1.92  2.65 | 80.02  89.80  98.92  94.59 | 2.67  6.98  1.72  3.39 | 82.68  91.82  102.89  97.70 | 4.51  1.01  3.11  1.95 |
| Dabrafenib | LLOV  LOV  MOV  ULOV | 108.30  99.20  95.95  98.07 | 1.61  3.53  7.15  4.68 | 96.59  97.93  94.18  94.86 | 8.19  6.28  6.47  5.80 | 102.17  100.31  97.91  102.36 | 7.88  6.90  3.71  0.96 | 93.39  92.82  96.99  97.02 | 4.14  3.96  1.31  2.01 | 98.77  98.06  93.66  95.85 | 2.08  5.68  0.36  2.22 | 97.03  96.47  93.16  94.10 | 1.40  5.09  1.63  1.79 | 94.58  96.82  96.47  96.73 | 4.11  5.46  4.35  4.83 | 85.27  96.17  103.03  106.76 | 2.67  6.34  2.74  1.37 | 90.79  94.10  102.71  106.78 | 1.29  9.03  2.44  2.38 |
| Dacomitinib | LLOV  LOV  MOV  ULOV | 68.27  94.78  101.07  94.66 | 2.58  7.07  3.71  3.81 | 92.37  89.84  91.07  87.56 | 7.47  3.51  0.43  2.89 | 98.06  89.13  93.12  90.32 | 8.06  7.94  2.27  3.65 | 106.61  101.77  101.74  99.68 | 6.14  2.21  0.69  1.42 | 107.68  111.97  106.79  104.88 | 8.31  2.00  0.51  0.96 | 113.84  107.02  107.77  107.50 | 2.86  2.26  1.60  0.96 | 99.30  92.54  93.19  93.58 | 4.34  8.60  0.64  1.66 | 87.94  90.16  99.21  96.86 | 13.56  5.04  3.64  3.22 | 81.66  98.85  105.58  103.24 | 4.98  5.59  1.00  0.42 |
| Darolutamide | LLOV  LOV  MOV  ULOV | 97.02  98.43  100.79  97.45 | 2.61  0.71  0.91  2.10 | 98.63  95.49  100.09  99.01 | 0.60  1.43  2.96  2.07 | 99.60  96.84  99.58  100.06 | 2.91  1.01  1.04  0.09 | 101.33  99.07  100.28  100.75 | 1.99  0.53  0.60  0.69 | 100.18  98.67  98.02  99.60 | 2.26  0.86  2.08  1.27 | 99.44  98.59  99.16  101.30 | 1.38  0.59  1.05  1.23 | 105.93  102.48  102.93  102.76 | 0.71  2.44  2.09  0.33 | 85.40  91.01  104.51  101.79 | 4.04  1.74  3.16  0.80 | 86.36  93.11  103.01  103.31 | 1.45  1.56  5.64  2.15 |
| Dasatinib | LLOV  LOV  MOV  ULOV | 88.30  90.42  93.37  96.78 | 1.80  1.83  1.54  1.29 | 101.20  102.90  96.66  96.53 | 3.15  2.11  0.60  3.70 | 107.03  98.22  97.85  99.07 | 2.05  1.63  1.40  2.18 | 109.27  103.47  100.75  101.66 | 0.83  1.87  1.03  1.59 | 114.33  109.32  102.72  101.44 | 3.03  1.48  1.02  1.12 | 101.70  104.80  99.06  105.85 | 0.95  0.30  1.24  1.95 | 95.03  87.98  93.78  93.36 | 19.30  3.78  6.37  5.14 | 91.93  102.35  105.94  104.84 | 16.04  8.98  10.47  1.02 | 93.80  104.03  101.33  98.59 | 12.07  14.34  7.01  2.44 |
| Duvelisib | LLOV  LOV  MOV  ULOV | 114.20  95.81  94.82  95.92 | 2.25  1.30  1.39  2.98 | 101.48  94.65  92.76  91.20 | 7.52  5.03  3.13  9.34 | 104.68  97.71  98.36  101.88 | 4.20  1.28  1.62  1.33 | 102.29  96.65  101.42  103.50 | 1.25  2.24  1.17  2.22 | 105.04  103.15  100.29  102.27 | 1.70  2.71  2.09  2.42 | 103.91  101.89  100.89  107.08 | 1.43  1.45  0.71  2.66 | 100.88  94.73  92.95  94.86 | 2.76  1.41  1.08  1.94 | 86.97  89.66  98.25  100.66 | 5.75  2.26  4.95  1.71 | 87.01  88.46  96.85  97.96 | 2.27  1.52  2.81  0.44 |
| Encorafenib | LLOV  LOV  MOV  ULOV | 101.65  102.03  100.69  98.19 | 4.41  0.68  1.18  3.91 | 98.81  99.13  100.77  99.30 | 8.31  4.23  0.81  2.84 | 97.17  101.05  102.60  101.96 | 12.44  5.03  4.52  2.05 | 103.28  103.81  102.14  100.06 | 10.76  5.17  2.86  3.79 | 97.36  100.45  100.70  99.52 | 8.16  4.28  5.55  2.64 | 98.04  105.51  100.47  100.14 | 9.41  5.10  3.89  0.88 | 108.08  103.30  98.44  99.57 | 7.30  9.87  1.02  1.01 | 82.14  95.05  101.57  99.20 | 3.34  1.58  2.86  2.33 | 78.94  95.33  98.49  101.15 | 12.43  11.09  0.27  3.49 |
| Endoxifen | LLOV  LOV  MOV  ULOV | 97.13  91.76  93.12  93.98 | 4.72  1.18  3.21  5.59 | 46.29  53.66  87.19  92.39 | 10.33  7.85  4.28  5.08 | 48.29  56.04  90.67  98.29 | 8.01  8.99  0.96  1.92 | 86.66  88.69  96.67  96.12 | 0.69  0.52  0.97  1.57 | 98.90  101.89  98.50  101.55 | 5.69  2.73  2.72  1.06 | 99.87  103.96  101.21  102.83 | 2.98  3.89  2.46  1.36 | 70.83  82.97  95.11  98.54 | 4.09  1.01  1.03  0.46 | 80.35  87.45  96.65  97.14 | 8.34  3.99  1.39  4.22 | 94.72  94.21  100.81  100.52 | 3.22  4.53  3.24  1.36 |
| Entrectinib | LLOV  LOV  MOV  ULOV | 93.54  102.63  101.97  95.92 | 2.56  1.87  0.99  2.28 | 77.40  87.34  98.81  88.59 | 4.49  3.80  2.52  6.42 | 77.48  87.26  97.33  91.63 | 4.29  5.33  1.39  2.78 | 85.65  98.85  99.33  90.36 | 2.82  1.64  1.11  0.89 | 92.21  102.70  103.71  94.89 | 4.00  4.22  3.55  1.13 | 94.46  106.90  107.68  100.77 | 2.99  1.38  1.88  1.94 | 91.08  94.35  98.90  94.37 | 4.63  4.42  2.78  1.03 | 81.73  92.87  101.55  93.36 | 4.07  2.98  3.03  1.08 | 83.86  96.18  105.05  97.38 | 1.73  2.11  2.06  2.53 |
| Enzalutamide | LLOV  LOV  MOV  ULOV | 90.36  96.54  102.93  99.90 | 1.10  2.05  2.11  4.78 | 99.46  97.31  101.47  99.14 | 0.82  3.29  2.52  0.56 | 98.39  98.44  100.95  99.65 | 1.37  2.84  2.06  0.95 | 99.69  101.80  103.95  101.51 | 2.56  1.50  0.43  1.20 | 95.43  98.90  99.62  99.09 | 0.94  1.16  2.27  1.92 | 95.08  99.45  100.21  100.59 | 0.45  0.62  1.70  1.46 | 106.09  102.78  103.21  100.42 | 2.85  2.13  0.58  1.53 | 88.76  94.90  104.47  100.33 | 2.73  2.98  2.45  0.31 | 90.55  96.03  107.22  101.99 | 2.23  1.81  0.79  2.08 |
| Erlotinib | LLOV  LOV  MOV  ULOV | 112.99  97.86  97.71  97.04 | 1.62  0.58  0.83  0.73 | 106.67  98.87  98.92  98.51 | 1.37  1.22  5.04  1.27 | 104.18  96.75  99.38  101.09 | 0.73  2.12  3.72  2.03 | 105.40  99.83  101.68  103.30 | 2.33  3.58  0.52  2.06 | 101.86  103.39  103.20  105.99 | 2.78  2.26  1.91  0.84 | 105.14  105.52  105.50  110.02 | 0.83  2.71  0.74  1.71 | 102.14  94.52  93.01  94.95 | 1.93  1.14  0.55  1.43 | 87.69  90.76  98.13  101.40 | 5.11  1.93  3.45  1.12 | 87.53  88.71  98.65  98.76 | 0.55  0.09  1.60  2.84 |
| Fedratinib | LLOV  LOV  MOV  ULOV | 86.06  96.87  97.89  85.42 | 5.20  3.63  2.03  1.08 | 80.50  93.65  99.57  89.01 | 5.46  1.73  3.24  6.48 | 80.15  95.22  99.75  90.75 | 4.99  3.33  1.71  1.94 | 89.99  96.30  100.91  92.52 | 2.50  1.03  0.85  1.02 | 96.43  109.19  108.58  103.14 | 2.06  3.50  1.28  1.90 | 98.95  109.79  107.51  102.53 | 3.62  0.90  0.92  1.16 | 91.59  97.71  95.90  86.27 | 5.06  1.51  2.42  1.72 | 75.24  93.98  103.61  92.18 | 2.35  5.24  2.59  1.91 | 77.28  96.33  105.67  94.02 | 2.32  2.98  3.86  2.41 |
| Gefitinib | LLOV  LOV  MOV  ULOV | 95.51  92.68  96.77  93.82 | 1.25  1.89  2.14  1.85 | 95.57  97.10  98.70  94.13 | 2.39  1.66  2.84  0.98 | 95.35  94.50  97.50  97.49 | 1.16  1.51  4.81  3.10 | 97.84  97.28  103.61  99.12 | 2.17  3.63  0.69  1.12 | 103.85  104.71  105.06  106.00 | 2.42  5.00  1.35  0.72 | 105.97  105.32  104.81  104.13 | 4.61  1.95  1.88  1.44 | 98.68  91.37  96.06  94.75 | 2.26  5.91  1.61  1.40 | 85.26  91.08  98.88  99.16 | 3.27  1.10  4.87  0.83 | 85.71  90.08  103.94  99.57 | 0.95  3.11  2.10  2.79 |
| Gilteritinib | LLOV  LOV  MOV  ULOV | 93.45  89.58  87.98  88.48 | 2.50  2.99  0.28  3.15 | 95.35  97.81  104.85  100.62 | 8.14  6.39  0.62  1.32 | 96.19  98.49  104.45  99.10 | 9.11  5.55  3.50  1.36 | 86.86  90.27  81.14  87.44 | 3.06  0.58  0.86  1.16 | 102.96  107.12  101.69  102.44 | 2.87  3.73  1.25  2.65 | 108.70  107.39  102.79  103.63 | 4.46  1.92  1.56  1.66 | 82.53  77.32  83.72  85.31 | 6.88  5.05  1.54  3.32 | 86.29  85.55  69.17  75.49 | 1.95  2.67  2.12  0.38 | 86.02  84.15  71.74  75.84 | 1.06  1.21  2.13  2.65 |
| Glasgedib | LLOV  LOV  MOV  ULOV | 86.06  97.81  103.92  99.24 | 1.61  3.02  1.37  1.62 | 95.25  99.41  99.40  95.02 | 3.70  0.34  0.92  1.27 | 95.90  97.46  98.15  96.88 | 2.36  1.20  2.71  3.56 | 96.72  98.76  103.24  99.55 | 0.96  2.85  0.55  0.22 | 101.80  103.00  102.33  102.97 | 0.95  3.41  1.56  1.24 | 101.38  104.17  100.78  103.23 | 2.00  1.11  1.58  1.45 | 103.84  98.73  97.24  95.41 | 1.07  2.33  1.28  0.89 | 85.58  96.04  103.86  99.26 | 1.31  0.90  2.36  1.01 | 86.71  94.58  105.91  100.88 | 0.46  1.85  2.31  0.99 |
| Hydroxy-dabrafenib | LLOV  LOV  MOV  ULOV | 96.65  95.93  105.38  104.36 | 4.90  11.11  7.69  2.69 | 95.93  89.37  93.97  98.14 | 7.42  9.80  4.96  6.55 | 107.71  89.24  97.71  100.06 | 5.48  7.92  2.23  1.98 | 102.09  93.51  99.70  103.84 | 2.95  4.50  1.59  1.83 | 86.94  88.61  94.59  96.52 | 5.66  11.16  2.03  1.95 | 88.55  86.34  91.92  94.35 | 4.91  9.81  1.78  1.85 | 102.22  98.84  100.17  97.61 | 8.30  2.16  2.14  2.97 | 85.96  86.56  107.77  104.36 | 2.62  2.32  6.23  0.49 | 78.28  88.35  98.71  103.43 | 3.87  9.61  5.34  4.90 |
| Ibrutinib | LLOV  LOV  MOV  ULOV | 95.46  95.82  90.30  87.87 | 13.54  4.83  3.30  5.30 | 82.56  79.27  74.02  71.85 | 8.31  5.14  5.06  8.14 | 82.54  78.17  74.43  72.57 | 10.35  7.29  3.00  3.91 | 91.16  92.09  92.81  92.34 | 3.89  0.86  1.70  1.50 | 100.87  96.50  97.86  100.33 | 1.34  5.26  3.30  2.69 | 101.10  101.06  98.84  102.57 | 7.52  4.84  3.23  1.45 | n/a  n/a  81.31  82.10 | n/a  n/a  1.88  0.70 | n/a  100.41  98.59  94.98 | n/a  n/a  0.98  3.32 | n/a  97.39  104.68  99.51 | n/a  15.30  3.29  1.28 |
| Idelalisib | LLOV  LOV  MOV  ULOV | 111.88  96.45  97.53  97.67 | 1.52  1.45  3.08  2.53 | 112.04  100.07  98.65  100.04 | 1.28  1.62  2.79  2.76 | 110.11  98.85  98.83  103.96 | 0.40  1.13  3.20  1.43 | 109.79  100.00  100.10  104.73 | 0.96  1.99  0.25  1.74 | 105.54  100.98  98.56  104.28 | 1.10  2.27  4.06  1.35 | 105.77  100.05  99.62  108.29 | 1.34  1.69  0.64  1.04 | 101.99  92.98  93.53  95.56 | 0.79  0.14  1.62  0.87 | 91.99  91.77  98.45  101.64 | 4.17  1.86  1.94  0.59 | 92.72  89.58  96.85  98.45 | 2.95  3.04  1.83  1.78 |
| Imatinib | LLOV  LOV  MOV  ULOV | 105.74  100.42  98.01  89.74 | 5.84  3.86  0.49  2.57 | 97.15  102.80  100.85  95.03 | 1.12  0.65  1.71  2.47 | 96.47  100.48  98.87  96.12 | 0.28  2.64  1.42  1.65 | 96.81  98.99  101.30  97.96 | 1.79  3.61  2.21  0.98 | 96.69  103.41  103.93  101.09 | 5.74  2.79  2.42  0.59 | 96.89  101.36  101.11  101.90 | 7.61  2.49  1.97  1.11 | 76.69  90.80  95.59  86.90 | 8.02  3.12  2.35  1.71 | 92.31  103.58  108.30  96.38 | 5.68  3.30  1.81  1.94 | 94.80  105.03  108.70  96.27 | 2.47  4.93  1.08  4.11 |
| Lapatinib | LLOV  LOV  MOV  ULOV | 88.28  96.15  100.24  100.67 | 6.17  4.22  7.20  8.60 | 54.07  52.83  91.01  92.10 | 0.62  1.50  1.00  4.33 | 57.43  56.59  91.59  97.54 | 5.86  5.06  1.96  3.12 | 92.82  93.22  94.32  97.35 | 1.17  4.59  1.92  2.42 | 105.49  105.23  101.73  99.94 | 1.73  1.67  4.09  3.76 | 103.60  102.51  102.67  101.78 | 0.99  0.28  1.46  2.32 | 65.20  65.98  86.51  91.05 | 6.61  2.52  0.86  1.63 | 55.55  64.56  86.26  93.58 | 8.70  6.09  3.63  4.50 | 92.47  96.06  101.42  101.41 | 2.77  8.73  1.93  4.02 |
| Larotrectinib | LLOV  LOV  MOV  ULOV | 86.86  92.66  99.21  96.52 | 8.76  9.35  2.25  2.26 | 98.89  95.87  102.18  100.90 | 2.01  4.01  2.83  3.32 | 80.12  96.17  99.76  101.00 | 3.68  2.99  3.27  3.22 | 91.76  95.01  97.86  100.00 | 4.55  2.70  1.58  3.22 | 88.59  96.36  94.52  95.61 | 3.99  2.83  4.21  1.26 | 88.51  91.74  96.63  97.50 | 5.77  7.28  1.14  2.68 | 97.67  105.16  98.40  100.78 | 3.52  4.44  1.11  0.75 | 63.75  90.27  99.79  98.53 | 19.75  3.02  3.39  2.15 | 70.19  90.86  100.04  99.07 | 15.12  4.35  4.71  2.29 |
| Lenalidomide | LLOV  LOV  MOV  ULOV | 105.58  85.52  95.00  94.90 | 1.56  4.55  8.08  3.86 | 93.73  56.66  64.95  59.83 | 5.33  8.46  4.52  7.34 | 95.53  56.01  62.62  59.30 | n/a  8.66  5.90  5.41 | 96.87  85.43  94.25  92.90 | 0.55  4.58  0.46  2.04 | 114.93  87.30  97.13  99.54 | 1.48  5.02  0.86  1.34 | 115.00  82.83  96.97  95.01 | 1.89  6.94  2.95  2.28 | 101.24  57.90  72.98  66.51 | 0.19  18.86  5.56  1.62 | 104.22  79.42  95.00  94.85 | 1.70  9.35  2.68  3.76 | 106.00  73.17  101.20  98.00 | 2.08  9.08  7.77  3.47 |
| Lenvatinib | LLOV  LOV  MOV  ULOV | 111.25  97.30  97.82  95.58 | 2.31  1.44  0.84  4.01 | 105.61  100.92  98.08  97.50 | 7.67  5.83  2.00  0.82 | 106.47  96.09  98.74  101.15 | 6.28  4.30  2.41  3.08 | 102.57  98.25  101.41  102.45 | 7.06  3.79  3.05  1.67 | 102.92  102.90  98.53  102.75 | 4.35  1.95  1.91  1.21 | 105.44  102.67  103.10  106.89 | 3.65  5.59  1.79  1.41 | 99.79  92.37  95.81  98.86 | 3.84  4.56  1.00  0.43 | 86.81  92.10  101.14  101.69 | 6.54  6.17  0.92  1.58 | 89.15  90.94  99.90  99.78 | 8.04  2.79  6.10  2.86 |
| Letrozole | LLOV  LOV  MOV  ULOV | 112.38  100.63  102.06  100.26 | 4.02  2.79  0.51  1.10 | 111.37  96.67  97.39  97.00 | 8.58  6.56  5.06  3.77 | 103.63  95.40  97.60  99.16 | 4.23  4.67  3.98  4.87 | 106.62  98.47  101.69  104.47 | 2.98  1.76  1.33  1.53 | 109.66  101.82  97.43  102.05 | 3.80  6.19  0.56  2.44 | 106.40  102.98  98.08  103.36 | 4.11  3.32  0.43  1.58 | 100.42  93.35  92.60  93.11 | 2.45  1.81  0.58  1.00 | 90.41  91.59  98.33  102.60 | 3.46  1.70  0.98  0.90 | 90.30  90.67  99.98  99.34 | 8.20  1.56  2.23  1.44 |
| Lorlatinib | LLOV  LOV  MOV  ULOV | 95.22  95.02  99.15  98.14 | 1.19  3.42  1.45  1.90 | 104.44  100.11  97.32  97.31 | 1.51  3.07  0.88  2.98 | 102.30  97.78  98.54  98.25 | 3.68  2.30  3.10  2.14 | 102.63  98.12  99.52  100.59 | 1.00  2.76  0.37  2.41 | 104.84  102.35  100.69  103.82 | 2.37  3.00  1.43  0.98 | 101.54  100.32  98.17  100.32 | 3.47  0.55  1.49  2.20 | 98.41  94.43  96.29  95.73 | 1.13  1.05  0.93  2.47 | 84.79  89.15  100.51  100.07 | 4.54  4.17  1.59  0.48 | 82.62  88.37  102.59  100.56 | 2.82  1.21  0.75  0.78 |
| Midostaurin | LLOV  LOV  MOV  ULOV | 86.67  97.76  103.14  98.21 | 14.44  4.85  3.40  4.16 | 104.78  102.14  99.58  104.96 | 12.38  5.82  1.29  3.57 | 90.56  108.94  95.71  103.70 | 6.36  13.06  1.23  4.48 | 91.94  100.82  100.30  100.91 | 2.36  5.85  2.62  1.16 | 101.02  107.37  104.50  106.49 | 1.66  4.99  3.70  4.40 | 95.20  98.83  98.04  99.84 | 4.69  5.53  0.76  7.63 | 88.38  97.39  98.34  101.81 | 7.59  8.91  6.20  4.92 | 84.44  94.61  101.28  104.31 | 0.36  4.33  4.06  5.81 | 91.69  91.75  103.41  107.12 | 6.87  1.73  2.32  4.51 |
| N-desmethyl enzalutamide | LLOV  LOV  MOV  ULOV | 97.52  100.86  103.99  101.03 | 0.44  1.85  2.86  2.77 | 99.98  97.18  100.80  98.72 | 2.53  2.02  3.62  3.57 | 99.38  96.99  97.33  99.82 | 5.56  2.49  3.40  1.88 | 105.59  101.65  100.48  99.79 | 1.92  2.23  3.29  1.43 | 99.22  99.51  98.79  102.07 | 1.30  0.54  3.56  2.58 | 97.81  98.25  100.46  101.78 | 2.00  1.71  2.66  1.92 | 102.22  101.57  101.13  98.44 | 8.16  2.91  3.49  0.77 | 87.92  95.57  103.71  102.57 | 3.53  1.76  2.13  2.17 | 89.13  96.58  105.64  103.90 | 3.60  3.09  2.52  0.52 |
| Neratinib | LLOV  LOV  MOV  ULOV | 72.69  105.54  102.03  85.92 | 13.37  10.92  8.89  8.47 | 50.19  46.48  49.45  35.87 | 3.41  23.77  11.84  14.09 | 33.44  51.01  53.49  35.43 | n/a  26.31  4.40  5.68 | 87.19  86.47  89.26  85.61 | 3.10  2.54  3.47  0.35 | 108.04  113.08  106.73  109.55 | 18.57  4.90  1.89  2.99 | 114.73  109.21  106.28  111.22 | 1.61  3.24  2.44  2.53 | 114.06  69.64  57.77  41.67 | 6.62  12.17  7.26  4.33 | 69.15  82.42  92.80  84.15 | 4.72  5.84  2.04  3.40 | 83.74  104.49  111.44  95.06 | 0.67  15.79  2.60  2.60 |
| Nilotinib | LLOV  LOV  MOV  ULOV | 95.85  98.49  99.36  96.03 | 1.97  1.22  4.22  5.33 | 101.06  95.05  97.90  99.20 | 3.23  2.31  2.94  3.85 | 102.46  96.25  98.04  100.96 | 1.34  3.62  1.39  1.50 | 99.92  98.24  97.88  98.06 | 1.08  1.15  1.63  1.56 | 104.98  102.24  99.90  103.12 | 0.38  0.98  3.03  1.92 | 104.32  102.68  100.31  104.04 | 1.01  1.20  2.18  0.43 | 108.72  98.45  97.37  98.74 | 1.94  0.77  2.78  0.86 | 92.38  92.21  97.15  98.89 | 3.46  4.41  2.30  2.58 | 92.97  96.69  100.49  101.67 | 1.05  2.07  0.30  1.01 |
| Nintedanib | LLOV  LOV  MOV  ULOV | 93.97  94.94  99.72  98.04 | 5.97  2.02  3.73  2.18 | 99.29  96.67  93.67  95.88 | 6.23  7.23  2.66  3.00 | 100.16  99.67  95.02  96.49 | 7.00  4.16  4.89  2.92 | 101.64  104.36  100.14  89.25 | 6.86  6.62  2.10  4.79 | 92.98  97.51  96.13  98.77 | 6.70  4.28  1.25  8.88 | 98.29  107.57  104.91  102.25 | 3.54  5.28  3.62  1.85 | 96.63  88.31  95.73  99.95 | 8.54  8.37  4.23  3.49 | 87.53  87.42  91.67  94.25 | 8.40  11.08  4.27  12.09 | 102.93  96.71  98.46  103.16 | 7.14  1.56  2.12  1.71 |
| Niraparib | LLOV  LOV  MOV  ULOV | 99.72  96.20  97.76  94.72 | 1.08  1.26  0.47  1.17 | 95.92  96.41  96.65  92.48 | 0.84  2.11  1.28  2.42 | 95.45  94.30  96.39  94.76 | 0.25  1.49  1.79  2.39 | 98.18  96.90  100.01  99.13 | 0.85  0.39  0.74  0.53 | 103.61  101.85  101.40  103.25 | 0.94  2.61  0.35  0.81 | 103.93  101.60  101.34  104.11 | 2.27  1.72  1.09  0.61 | 97.54  94.54  94.36  94.36 | 1.98  0.28  0.88  1.43 | 87.46  91.98  99.52  99.41 | 0.27  2.82  2.05  1.55 | 89.33  91.60  102.31  99.16 | 0.76  0.37  3.05  0.86 |
| N-oxid sorafenib | LLOV  LOV  MOV  ULOV | 105.29  98.98  96.80  97.01 | 2.68  2.26  0.69  3.32 | 97.54  94.77  97.87  99.04 | 0.81  1.43  1.32  1.25 | 99.75  97.81  97.70  101.48 | 4.52  0.65  1.40  1.09 | 99.35  97.18  99.48  100.55 | 2.33  1.83  1.30  1.82 | 103.87  101.24  99.12  102.38 | 1.37  0.99  2.41  0.90 | 102.10  102.23  100.24  100.52 | 2.64  1.37  1.00  0.71 | 96.61  102.02  100.33  100.51 | 1.46  1.44  0.98  1.58 | 84.12  94.20  101.66  101.24 | 1.82  3.82  2.05  2.17 | 88.75  93.61  102.17  102.87 | 5.65  3.02  2.46  0.85 |
| Olaparib | LLOV  LOV  MOV  ULOV | 112.09  94.33  94.49  95.86 | 1.46  0.16  0.94  2.76 | 107.68  99.42  98.14  99.56 | 1.79  0.75  2.95  0.91 | 106.88  99.99  99.88  101.44 | 2.41  0.67  2.11  1.53 | 105.09  98.45  99.70  102.54 | 1.06  1.26  0.98  1.53 | 104.37  102.05  100.50  104.96 | 2.70  2.19  2.48  0.98 | 103.13  103.22  101.52  107.39 | 0.81  1.55  1.97  1.50 | 102.38  97.61  96.42  98.00 | 2.79  0.52  0.72  1.07 | 89.82  92.27  100.25  102.75 | 3.92  1.41  3.24  0.14 | 89.03  90.15  99.53  100.31 | 1.93  0.30  0.83  2.44 |
| Osimertinib | LLOV  LOV  MOV  ULOV | 89.22  88.92  92.87  88.51 | 2.77  0.88  1.42  1.40 | 67.89  67.85  81.67  81.93 | 1.79  1.60  2.16  1.34 | 65.73  68.22  81.24  82.52 | 3.17  4.28  4.03  1.29 | 97.58  93.20  98.57  98.15 | 1.91  2.92  0.72  2.37 | 113.43  111.61  108.71  109.35 | 0.46  1.95  2.01  1.66 | 114.11  109.51  109.82  111.55 | 2.85  2.75  2.06  2.34 | 68.59  71.96  80.52  77.60 | 5.96  2.69  2.05  2.93 | 82.20  85.11  95.81  92.71 | 1.82  1.57  0.67  0.87 | 88.55  92.60  104.10  96.57 | 1.58  0.17  2.23  0.03 |
| Palbociclib | LLOV  LOV  MOV  ULOV | 99.86  91.71  93.24  93.69 | 1.25  2.31  2.17  2.37 | 84.91  81.80  91.80  88.91 | 2.06  2.73  3.14  6.26 | 89.94  81.18  94.21  93.87 | 10.88  1.00  2.88  3.66 | 104.64  96.35  100.89  97.88 | 1.97  3.97  0.44  2.36 | 105.79  99.39  102.30  105.39 | 6.62  4.02  2.41  2.01 | 109.33  105.31  102.58  108.70 | 1.44  3.68  3.54  0.54 | 99.24  88.28  88.46  94.81 | 8.00  0.88  2.35  1.69 | 86.88  88.05  92.38  90.78 | 0.58  6.54  2.06  1.05 | 88.30  87.45  96.74  93.99 | 8.68  4.14  0.85  2.58 |
| Pazopanib | LLOV  LOV  MOV  ULOV | 101.18  97.73  96.86  95.89 | 3.38  2.39  1.08  2.44 | 102.96  99.99  97.33  95.63 | 0.78  0.49  3.03  0.32 | 101.37  98.28  99.04  98.51 | 1.33  1.58  2.98  1.95 | 100.33  98.36  101.89  101.39 | 1.77  3.22  0.88  1.62 | 100.74  105.34  101.19  102.53 | 2.00  1.02  2.62  1.55 | 103.43  106.48  104.93  108.65 | 1.14  1.14  0.92  1.78 | 106.42  102.30  98.63  97.58 | 2.47  0.86  0.56  0.33 | 81.88  93.74  101.20  101.20 | 4.19  2.51  2.24  1.26 | 85.07  91.40  101.93  101.07 | 1.45  1.51  1.60  2.86 |
| Pemigatinib | LLOV  LOV  MOV  ULOV | 94.15  95.02  99.86  98.24 | 1.09  0.40  1.46  1.46 | 98.05  102.27  100.93  95.97 | 2.10  4.24  0.51  3.19 | 96.94  97.50  99.78  99.04 | 3.20  2.71  4.50  0.78 | 105.17  96.34  104.31  100.95 | 2.86  4.07  3.22  1.16 | 110.71  105.93  100.66  102.49 | 3.28  5.12  2.61  0.96 | 111.02  105.50  98.41  102.00 | 3.13  1.88  1.09  0.12 | 102.31  95.04  97.14  97.07 | 4.02  2.11  2.25  0.94 | 85.74  92.34  101.36  101.98 | 0.97  1.15  3.14  0.97 | 91.28  91.79  100.77  102.45 | 7.36  3.38  2.08  0.27 |
| Pomalidomide | LLOV  LOV  MOV  ULOV | 85.91  104.58  95.68  91.14 | 14.54  9.11  1.79  3.82 | 57.24  63.98  58.91  53.63 | 12.23  14.88  2.79  7.92 | 61.05  56.06  59.10  52.42 | 12.14  17.56  2.37  6.03 | 114.68  101.37  93.90  94.67 | 0.96  2.43  4.50  0.92 | 101.13  103.71  102.08  102.50 | 9.85  6.79  0.96  1.13 | 97.17  96.41  97.57  102.11 | 6.45  4.69  2.31  0.88 | 80.12  72.92  66.05  59.09 | 5.24  3.37  0.55  2.22 | 64.05  100.16  97.97  95.62 | 11.21  6.02  2.87  4.08 | 76.78  99.43  102.82  98.35 | 0.60  6.06  2.26  1.61 |
| Ponatinib | LLOV  LOV  MOV  ULOV | 91.90  94.83  98.68  98.96 | 10.56  3.63  1.32  1.79 | 94.63  91.00  95.52  94.23 | 2.84  6.98  2.26  2.71 | 100.14  93.92  94.81  97.72 | 2.06  3.10  4.31  1.35 | 100.36  100.50  100.84  101.02 | 7.51  5.35  1.04  1.30 | 105.70  104.17  99.95  103.68 | 9.76  2.34  2.36  1.05 | 101.65  107.34  106.15  109.43 | 3.38  0.66  1.22  1.96 | 96.38  101.68  96.92  94.22 | 4.01  4.69  1.41  1.58 | 74.51  89.14  100.27  100.10 | 18.06  5.38  2.79  1.53 | 90.60  96.94  105.32  102.23 | 3.79  13.04  1.57  3.53 |
| Pralsetinib | LLOV  LOV  MOV  ULOV | 86.43  98.46  102.73  98.09 | 1.56  1.85  0.29  3.04 | 103.18  101.35  102.18  98.55 | 1.69  1.66  1.09  0.41 | 102.54  102.29  99.96  99.64 | 1.22  1.59  2.60  0.38 | 91.38  100.53  100.30  99.30 | 1.26  1.76  0.25  0.83 | 94.34  99.01  98.42  98.73 | 0.96  1.57  3.79  1.26 | 95.16  99.06  101.84  102.77 | 1.47  2.62  1.21  1.24 | 104.59  105.24  101.71  100.56 | 2.76  2.12  1.46  1.60 | 86.50  95.89  103.75  99.85 | 5.73  1.16  3.55  1.27 | 88.51  97.96  107.87  103.66 | 1.70  2.35  1.41  2.13 |
| Regorafenib | LLOV  LOV  MOV  ULOV | 102.06  103.12  101.35  95.88 | 3.63  3.23  2.28  4.66 | 93.04  94.49  101.92  99.62 | 4.10  1.18  2.46  3.15 | 78.45  86.66  101.17  100.59 | 45.29  19.28  3.67  3.20 | 97.13  99.50  101.03  98.18 | 2.69  1.99  1.66  2.20 | 82.64  87.19  90.98  88.08 | 2.58  2.94  2.08  3.13 | 74.46  78.07  82.69  82.67 | 2.84  1.04  0.22  2.13 | 100.33  103.39  102.96  101.30 | 2.71  1.28  3.93  0.60 | 96.85  92.28  105.97  98.83 | 3.89  1.66  1.95  3.24 | 89.80  93.12  108.98  100.79 | 3.39  1.17  0.85  6.25 |
| Ribociclib | LLOV  LOV  MOV  ULOV | 99.17  92.23  92.56  92.43 | 1.67  2.08  1.15  2.61 | 85.45  93.99  96.40  91.26 | 2.74  2.23  1.36  5.05 | 86.36  93.41  97.95  94.44 | 2.92  2.24  0.61  1.13 | 91.69  96.56  98.12  94.10 | 1.53  2.77  0.75  0.68 | 96.56  101.69  103.19  100.45 | 1.41  4.50  0.40  0.61 | 99.62  103.52  104.30  103.85 | 4.10  0.94  1.60  1.53 | 97.23  95.81  95.68  92.78 | 0.97  1.89  0.44  1.18 | 86.07  91.26  97.00  98.55 | 2.94  2.22  1.54  1.61 | 87.34  89.73  100.82  97.33 | 1.39  2.55  1.50  1.45 |
| Rucaparib | LLOV  LOV  MOV  ULOV | 112.63  97.33  96.02  96.85 | 3.89  2.69  2.73  3.09 | 111.02  90.66  94.28  98.35 | 13.96  5.56  2.24  8.45 | 104.16  91.04  92.81  102.14 | 9.23  4.21  2.85  0.95 | 105.82  85.62  94.75  99.88 | 1.65  1.16  0.50  2.10 | 111.38  94.60  98.34  108.78 | 2.99  3.91  0.71  1.76 | 110.68  94.22  98.87  109.68 | 3.86  1.13  0.85  1.76 | 110.53  99.12  97.35  104.88 | 2.19  4.56  2.15  0.56 | 93.35  91.11  96.04  104.59 | 3.44  0.79  3.51  0.55 | 97.35  87.57  102.65  104.80 | 8.20  1.84  0.19  1.80 |
| Ruxolitinib | LLOV  LOV  MOV  ULOV | 94.43  95.00  103.21  101.18 | 3.17  5.18  1.87  2.88 | 103.92  102.91  99.40  97.26 | 4.00  2.79  1.68  1.68 | 105.95  99.48  96.38  97.73 | 8.82  2.32  2.79  1.29 | 98.99  99.89  102.62  101.89 | 6.87  4.27  2.13  0.28 | 103.41  104.60  103.66  103.15 | 4.97  5.92  0.77  0.59 | 100.61  104.64  101.01  105.11 | 4.81  1.59  3.82  1.62 | 99.89  95.03  98.06  96.03 | 8.25  2.91  2.17  1.20 | 88.40  90.00  103.62  102.81 | 14.76  6.53  0.32  1.15 | 81.07  90.92  105.08  103.75 | 3.31  2.22  0.85  0.97 |
| Selpercatinib | LLOV  LOV  MOV  ULOV | 109.72  95.76  96.36  95.44 | 1.38  1.28  1.30  4.57 | 104.30  99.13  98.93  96.72 | 2.45  2.56  2.73  3.17 | 104.85  97.79  100.61  100.86 | 2.16  0.46  1.65  1.45 | 100.79  97.05  103.42  100.76 | 2.11  1.43  1.08  2.06 | 102.30  103.91  102.11  103.31 | 2.34  1.38  2.66  0.72 | 104.84  105.94  106.47  110.75 | 1.72  2.80  1.61  1.61 | 100.47  96.48  94.57  96.68 | 1.83  1.22  0.93  0.88 | 88.12  92.47  101.65  103.24 | 2.75  3.19  1.63  0.48 | 87.96  91.11  99.96  99.75 | 2.38  1.66  0.88  1.35 |
| Selumetinib | LLOV  LOV  MOV  ULOV | 102.55  99.03  98.30  95.19 | 5.93  1.29  2.28  2.16 | 103.95  98.96  99.14  96.33 | 6.64  6.44  2.15  4.85 | 91.75  98.83  101.77  102.86 | 5.74  2.51  2.00  4.08 | 88.72  92.75  99.63  97.70 | 3.47  3.92  0.86  1.85 | 87.49  99.03  99.41  102.26 | 6.70  2.27  2.74  3.44 | 86.99  101.87  97.85  100.36 | 7.53  6.28  1.94  1.36 | 93.26  106.02  99.92  95.86 | 27.30  2.14  2.04  2.17 | 78.94  101.75  100.46  101.17 | 6.74  5.45  1.56  1.86 | 94.44  111.03  105.78  101.18 | 13.78  6.89  0.13  1.72 |
| Sonidegib | LLOV  LOV  MOV  ULOV | 96.67  94.66  95.41  97.01 | 2.12  3.80  0.42  3.21 | 99.83  101.11  97.14  98.69 | 2.25  2.40  1.13  2.37 | 98.87  100.43  96.78  99.46 | 3.50  3.96  1.33  2.65 | 100.02  96.99  97.96  96.44 | 4.28  2.99  1.99  1.75 | 106.59  106.24  101.71  100.62 | 4.10  3.73  3.73  1.20 | 107.06  111.35  102.20  102.45 | 4.95  3.10  1.62  1.64 | 95.38  98.51  96.78  99.21 | 4.11  1.30  1.91  0.77 | 86.34  91.33  100.34  100.22 | 2.49  3.07  1.32  1.83 | 84.60  90.44  101.02  102.00 | 1.97  2.39  2.27  1.19 |
| Sorafenib | LLOV  LOV  MOV  ULOV | 95.96  95.07  98.32  97.98 | 0.49  0.44  1.52  2.88 | 85.26  86.16  96.43  99.14 | 0.24  0.60  0.63  0.90 | 85.54  86.98  96.44  99.43 | 1.08  1.75  1.27  1.34 | 98.93  97.04  99.05  96.98 | 0.56  0.21  0.50  1.45 | 105.93  104.66  102.41  104.41 | 0.64  0.41  1.27  0.90 | 106.27  105.93  103.42  104.38 | 0.97  0.75  1.26  1.29 | 99.86  98.85  99.12  101.44 | 1.13  0.74  0.24  1.45 | 84.74  93.29  102.35  102.60 | 1.07  2.47  2.89  0.78 | 85.38  93.49  104.08  105.23 | 0.45  1.01  3.16  1.47 |
| Sunitinib | LLOV  LOV  MOV  ULOV | 111.33  94.27  92.69  92.70 | 5.13  3.06  0.91  2.72 | 105.14  97.60  98.78  97.27 | 3.41  3.99  0.80  3.56 | 106.29  98.38  100.55  101.72 | 4.58  3.36  1.42  0.73 | 103.63  100.09  100.91  100.75 | 0.40  1.40  1.92  1.00 | 108.50  107.01  104.39  105.94 | 3.00  3.03  1.72  2.02 | 113.13  112.77  111.28  114.41 | 0.34  3.01  1.61  0.76 | 97.81  95.33  92.30  93.40 | 3.85  1.43  0.59  1.74 | 91.01  91.30  97.50  99.40 | 2.55  1.91  3.18  1.73 | 93.27  92.25  96.26  99.27 | 2.67  4.39  3.98  1.80 |
| Talazoparib | LLOV  LOV  MOV  ULOV | 96.92  96.60  93.02  95.30 | 1.93  8.49  0.78  3.57 | 107.65  101.18  93.56  90.11 | 0.59  3.68  6.60  6.64 | 91.90  100.98  96.87  97.11 | 2.92  8.13  1.37  3.33 | 87.28  103.37  96.01  99.10 | 0.36  9.25  1.88  3.56 | 114.83  104.14  101.20  101.15 | 9.82  10.88  2.95  3.24 | 104.88  102.86  98.74  105.20 | 6.09  4.12  2.15  1.04 | n/a  95.88  95.43  89.66 | n/a  5.32  4.33  1.00 | 116.35  92.91  100.22  97.96 | n/a  17.45  7.59  1.42 | 107.10  94.85  98.45  96.38 | 9.84  11.73  5.60  3.66 |
| Tamoxifen | LLOV  LOV  MOV  ULOV | 98.81  92.31  91.35  92.44 | 2.44  0.98  2.28  3.48 | 87.54  91.78  88.19  91.52 | 2.82  1.13  2.39  3.64 | 92.08  88.99  88.41  94.14 | 2.72  3.76  1.45  1.25 | 94.39  95.42  97.17  96.16 | 1.98  3.09  1.57  2.17 | 108.66  109.48  103.13  106.16 | 1.48  3.10  1.75  1.63 | 114.53  114.16  109.26  111.06 | 0.84  4.06  2.68  1.03 | 89.57  88.51  85.59  90.43 | 5.97  2.83  1.52  2.43 | 77.88  87.91  94.88  95.76 | 5.31  3.07  1.43  1.84 | 76.78  88.76  100.91  100.09 | 5.20  7.10  1.20  1.01 |
| Thalidomide | LLOV  LOV  MOV  ULOV | 70.18  67.97  70.16  63.73 | 9.48  8.65  11.11  18.24 | n/a  4.20  3.41  1.88 | n/a  8.56  33.61  54.55 | n/a  4.56  2.90  1.32 | n/a  22.13  4.17  21.58 | 65.85  61.27  61.25  56.44 | 8.10  2.71  4.76  4.31 | 103.70  102.41  103.96  106.01 | 5.51  4.69  2.21  3.04 | 90.70  93.13  93.13  97.60 | 5.92  4.83  4.67  2.59 | 28.72  13.70  6.43  3.18 | n/a  7.91  19.79  5.85 | 56.30  52.55  56.82  55.94 | 9.72  3.31  7.72  8.36 | 81.39  80.91  89.77  82.87 | 7.58  8.04  3.81  2.57 |
| Tivozanib | LLOV  LOV  MOV  ULOV | 94.47  100.36  102.89  98.00 | 1.83  3.95  2.79  5.06 | 95.35  96.24  101.41  99.47 | 1.57  2.46  0.90  0.64 | 97.83  97.76  99.36  100.30 | 4.12  1.74  1.20  0.18 | 96.13  101.31  101.00  100.07 | 2.81  3.08  0.65  1.15 | 103.21  100.24  100.04  99.18 | 4.11  0.56  1.99  2.18 | 104.45  102.16  103.14  102.99 | 1.33  1.15  2.00  1.92 | 104.75  99.58  102.72  99.51 | 4.45  0.78  1.21  0.98 | 80.03  94.00  105.10  102.42 | 4.99  0.59  2.97  2.24 | 85.53  94.05  107.04  103.72 | 1.69  4.27  0.02  1.47 |
| Trametinib | LLOV  LOV  MOV  ULOV | 109.75  102.06  96.30  93.71 | 6.23  3.79  2.26  4.75 | 98.09  106.56  99.58  101.61 | 3.49  8.19  1.60  2.82 | 103.20  106.55  101.66  104.16 | 8.92  3.76  3.62  3.25 | 106.13  95.93  97.71  93.61 | 9.24  4.63  3.19  1.17 | 97.08  97.44  99.79  102.19 | 2.60  2.12  1.21  3.12 | 82.07  101.46  96.98  97.65 | 0.74  7.97  3.00  3.52 | 93.77  98.95  97.45  95.84 | 8.92  3.01  4.86  1.01 | 88.16  86.13  105.37  99.78 | 16.55  6.94  2.29  1.26 | 87.92  97.39  106.59  99.89 | 17.57  7.36  0.86  2.32 |
| Trifluridine | LLOV  LOV  MOV  ULOV | 74.88  107.13  97.41  88.75 | 7.93  6.33  0.67  3.01 | 55.62  85.22  83.88  75.82 | 9.95  9.10  3.75  1.87 | 52.46  77.42  80.14  73.92 | 33.98  9.37  7.13  3.62 | 88.42  99.95  99.54  91.80 | 3.20  2.37  1.51  1.17 | 87.66  100.75  99.67  93.79 | 5.68  2.08  1.70  0.08 | 85.74  102.65  100.44  95.45 | 3.46  3.07  0.83  1.26 | 89.87  97.19  94.28  86.17 | 11.09  3.54  2.26  2.87 | 74.61  105.53  102.99  97.08 | 6.83  3.71  1.33  1.41 | 75.96  107.64  104.56  96.57 | 3.05  4.23  4.86  2.20 |
| Tucatinib | LLOV  LOV  MOV  ULOV | 86.10  102.50  102.49  93.85 | 6.07  0.22  0.72  2.07 | 88.22  97.41  97.89  90.71 | 6.31  3.32  2.65  3.40 | 89.35  94.07  97.76  91.49 | 9.19  1.95  3.67  0.71 | 96.38  98.26  102.25  93.99 | 2.44  2.54  1.99  1.69 | 93.00  101.57  102.15  98.09 | 4.09  0.44  0.27  0.55 | 92.33  100.69  100.46  98.09 | 2.67  2.52  1.16  0.60 | 101.46  98.44  100.70  96.41 | 2.17  1.03  1.01  1.78 | 93.84  97.48  95.82  94.61 | 9.69  4.54  1.47  0.39 | 86.62  101.23  110.66  101.68 | 2.52  3.36  1.56  2.09 |
| Vandetanib | LLOV  LOV  MOV  ULOV | 86.72  99.73  101.05  86.94 | 2.24  0.84  1.63  0.53 | 87.82  96.94  99.02  88.53 | 6.25  0.76  2.59  1.70 | 86.86  95.07  100.11  89.89 | 6.71  2.09  2.94  3.82 | 92.98  99.48  103.98  95.41 | 1.63  1.40  1.47  0.82 | 104.89  107.90  105.99  100.29 | 2.52  2.88  1.47  1.13 | 107.39  106.03  105.75  99.58 | 5.84  3.11  0.62  1.75 | 86.77  92.22  95.77  90.22 | 3.69  1.18  1.65  1.71 | 80.48  98.83  108.06  96.48 | 2.69  3.80  2.71  2.65 | 79.76  96.61  112.43  97.45 | 1.25  3.10  4.11  0.34 |
| Vemurafenib | LLOV  LOV  MOV  ULOV | 103.57  97.39  96.09  97.85 | 3.40  1.12  1.16  3.69 | 107.35  101.99  94.42  97.52 | 2.16  7.15  1.60  1.14 | 103.12  110.55  96.08  101.56 | 1.86  10.63  1.55  2.28 | 100.75  98.05  98.16  96.39 | 4.17  3.31  1.37  2.28 | 107.82  101.81  100.13  103.21 | 8.05  1.22  2.43  1.66 | 108.69  103.11  101.29  104.51 | 1.99  2.49  2.58  0.71 | 94.79  97.21  97.88  98.95 | 4.59  0.31  0.94  2.64 | 83.67  89.97  101.51  100.90 | 4.78  3.01  2.03  1.03 | 83.10  91.72  101.42  104.17 | 2.13  2.15  5.39  1.93 |
| Venetoclax | LLOV  LOV  MOV  ULOV | 93.41  92.90  93.43  94.18 | 6.55  5.63  0.95  3.41 | 103.80  101.73  94.28  98.58 | 9.53  6.28  2.64  2.80 | 108.09  99.84  96.23  98.62 | 10.45  4.52  3.87  2.07 | 104.11  100.75  96.11  97.85 | 3.42  5.07  3.51  2.58 | 104.92  99.26  95.95  99.53 | 5.13  0.49  2.46  0.94 | 105.39  100.73  97.16  102.17 | 2.72  5.43  3.04  1.24 | 99.45  100.66  93.97  98.22 | 5.21  1.38  0.91  4.16 | 92.51  87.38  98.22  99.96 | 7.72  5.87  2.57  2.25 | 88.58  91.21  101.85  103.53 | 3.26  4.47  5.93  2.48 |
| Vinorelbine | LLOV  LOV  MOV  ULOV | 88.89  80.43  88.46  89.38 | 15.33  1.17  4.55  2.04 | 87.44  80.63  73.49  66.18 | 6.97  19.57  1.77  7.34 | 86.27  78.41  74.77  69.51 | 15.25  10.55  3.08  3.23 | 109.18  85.77  93.07  91.97 | 7.56  13.17  1.97  1.24 | 83.38  96.12  99.59  104.19 | 0.54  13.71  1.85  4.30 | 97.62  88.97  103.97  111.45 | 4.25  9.40  2.94  2.44 | n/a  88.54  68.26  55.93 | n/a  8.12  8.60  8.92 | n/a  93.80  89.50  86.27 | n/a  12.14  14.30  3.24 | n/a  83.95  106.17  100.19 | n/a  16.47  5.35  4.34 |
| Vismodegib | LLOV  LOV  MOV  ULOV | 85.15  99.30  104.82  97.30 | 0.76  0.46  1.11  2.52 | 87.91  99.05  103.33  97.45 | 1.19  1.17  1.31  1.69 | 88.08  98.92  101.93  97.40 | 1.11  1.09  1.41  0.75 | 88.57  102.38  103.31  97.50 | 1.24  1.36  0.16  0.38 | 87.40  101.09  101.12  97.13 | 2.51  0.85  2.18  1.81 | 85.17  99.87  99.11  96.78 | 1.58  2.23  1.59  0.75 | 99.98  101.40  104.09  99.60 | 1.87  1.74  1.64  0.12 | 85.04  95.28  105.61  100.15 | 0.85  4.06  2.66  0.98 | 85.01  97.98  108.25  102.14 | 0.88  0.66  0.02  1.45 |
| Zanubrutinib | LLOV  LOV  MOV  ULOV | 86.71  102.19  100.22  94.20 | 13.91  3.54  2.72  2.37 | 104.10  98.24  96.68  93.45 | 15.17  12.73  0.96  5.42 | 111.00  92.19  92.51  92.86 | 36.35  16.76  3.68  3.29 | 88.47  111.07  102.19  96.86 | 11.56  2.63  2.50  2.77 | 88.43  100.53  100.26  101.84 | 5.38  7.08  3.61  3.24 | 85.77  98.62  102.51  106.49 | 10.72  5.09  1.58  3.52 | 155.67  98.92  88.54  90.65 | 1.64  7.62  6.28  0.24 | 114.20  81.24  102.48  102.36 | 1.82  6.47  1.85  1.19 | 117.47  92.57  100.67  104.52 | n/a  15.54  0.61  1.37 |
| Δ4-abiraterone | LLOV  LOV  MOV  ULOV | 112.43  101.43  92.88  91.74 | 2.93  2.30  2.12  5.30 | 97.07  97.87  94.86  94.84 | 5.95  5.06  1.64  2.41 | 95.93  96.68  93.99  96.55 | 8.44  4.84  0.44  1.38 | 94.67  93.68  95.28  97.55 | 0.80  1.53  1.55  2.30 | 103.77  100.40  99.17  103.58 | 1.21  1.68  3.33  1.71 | 102.23  103.65  102.34  104.06 | 3.88  2.51  3.22  1.44 | 94.73  103.92  96.61  95.91 | 6.67  5.08  5.07  0.78 | 89.27  94.13  101.60  100.64 | 6.01  1.18  1.83  1.20 | 94.30  96.38  104.06  102.00 | 4.30  1.49  0.35  0.62 |

n/a = not available

ULOV: upper limit of validation

MOV: middle of validation limit

LOV: low limit of validation

LLOV: lower limit of validation

**
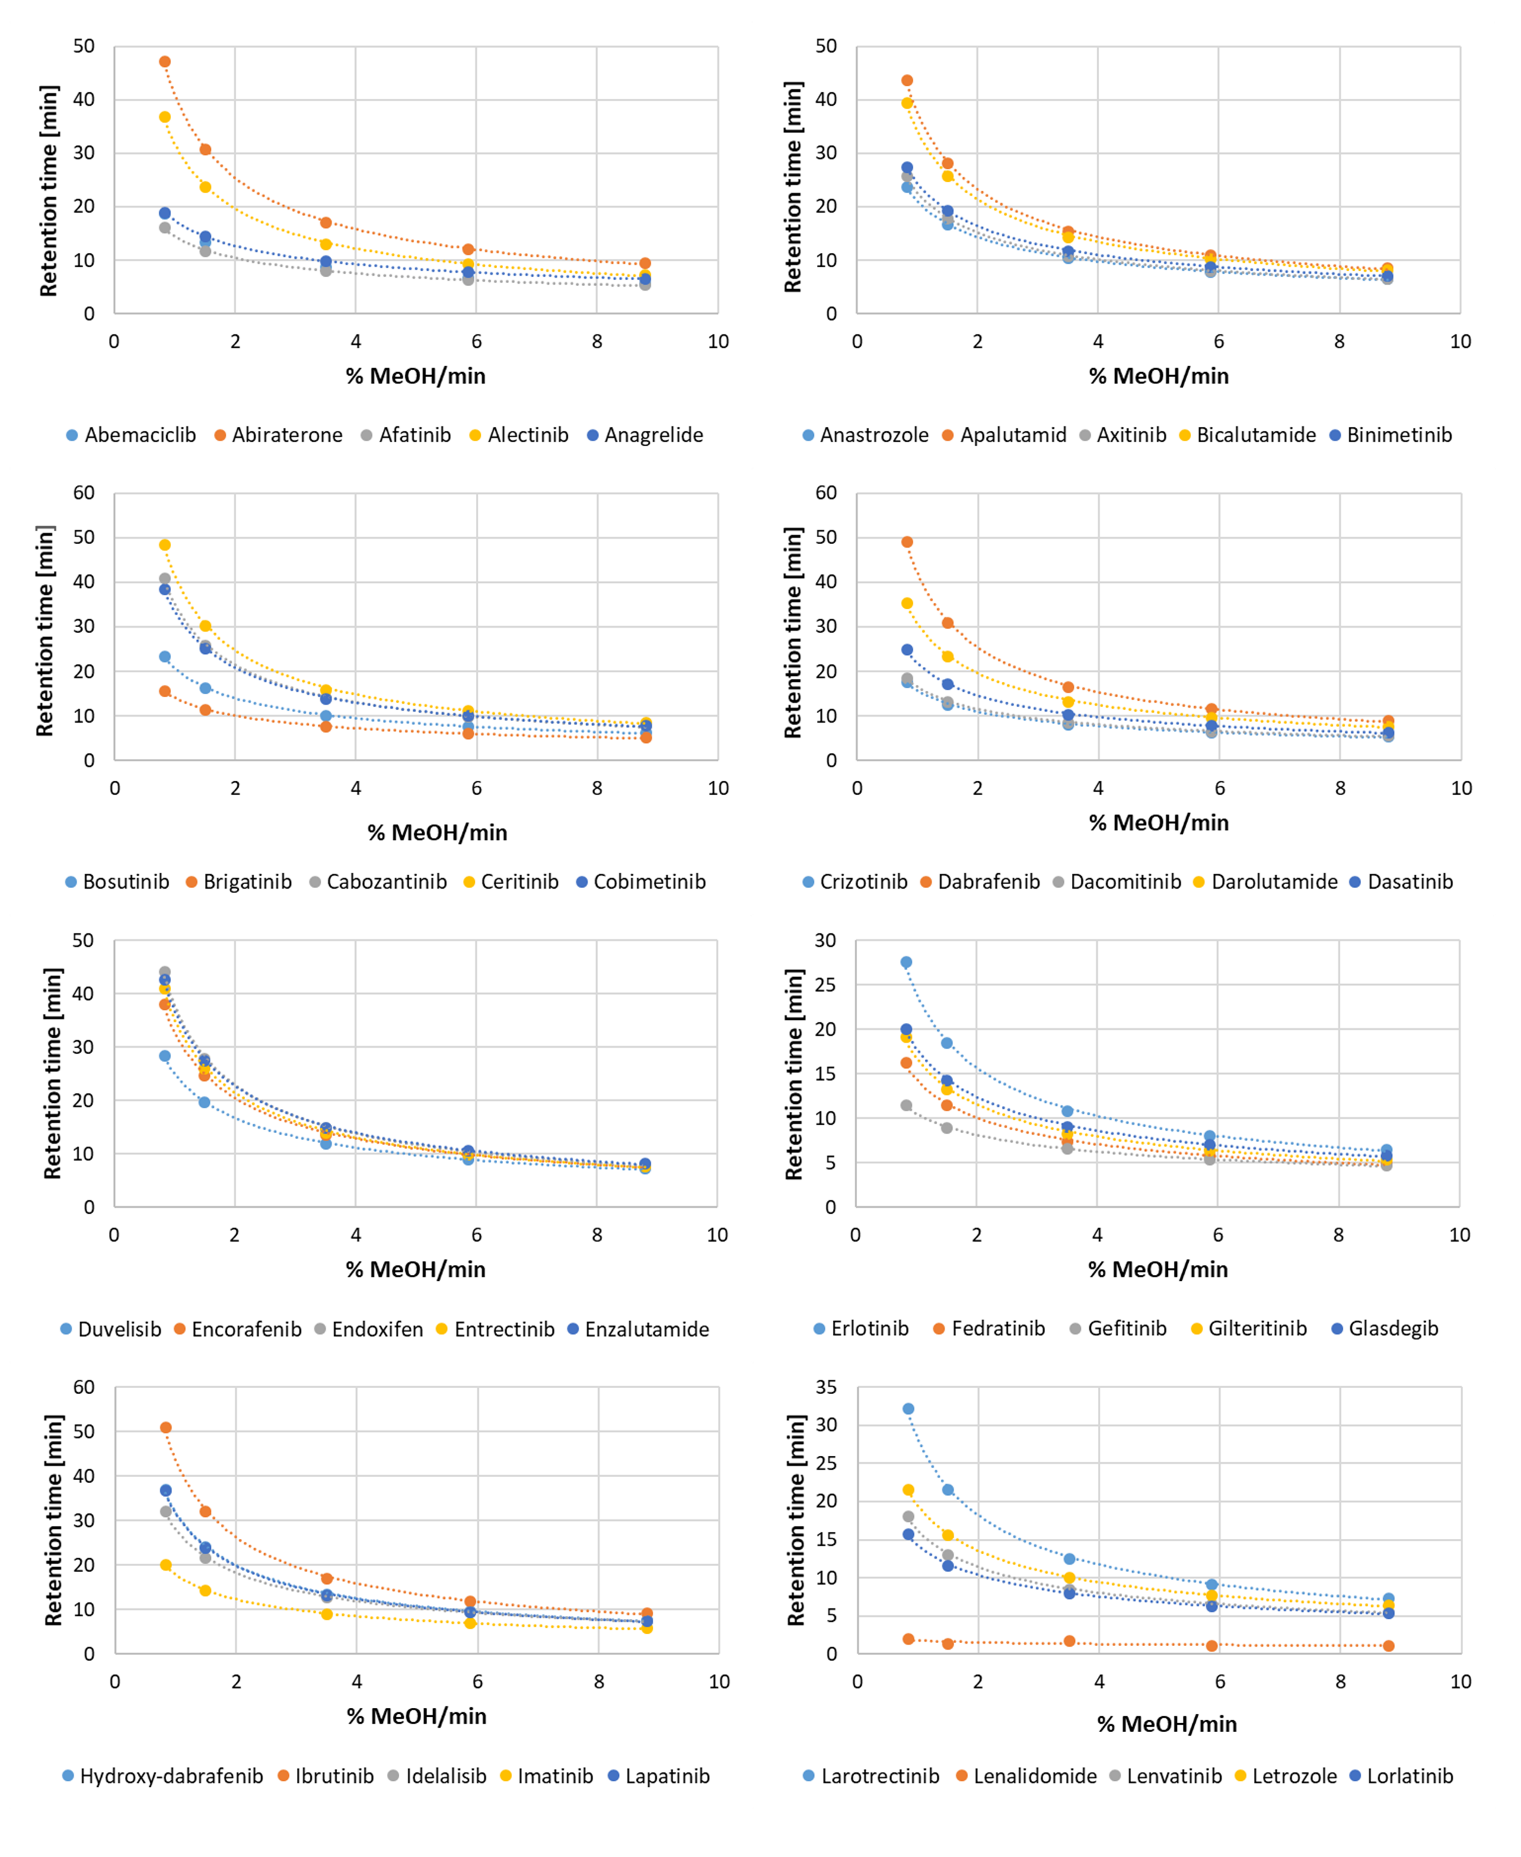

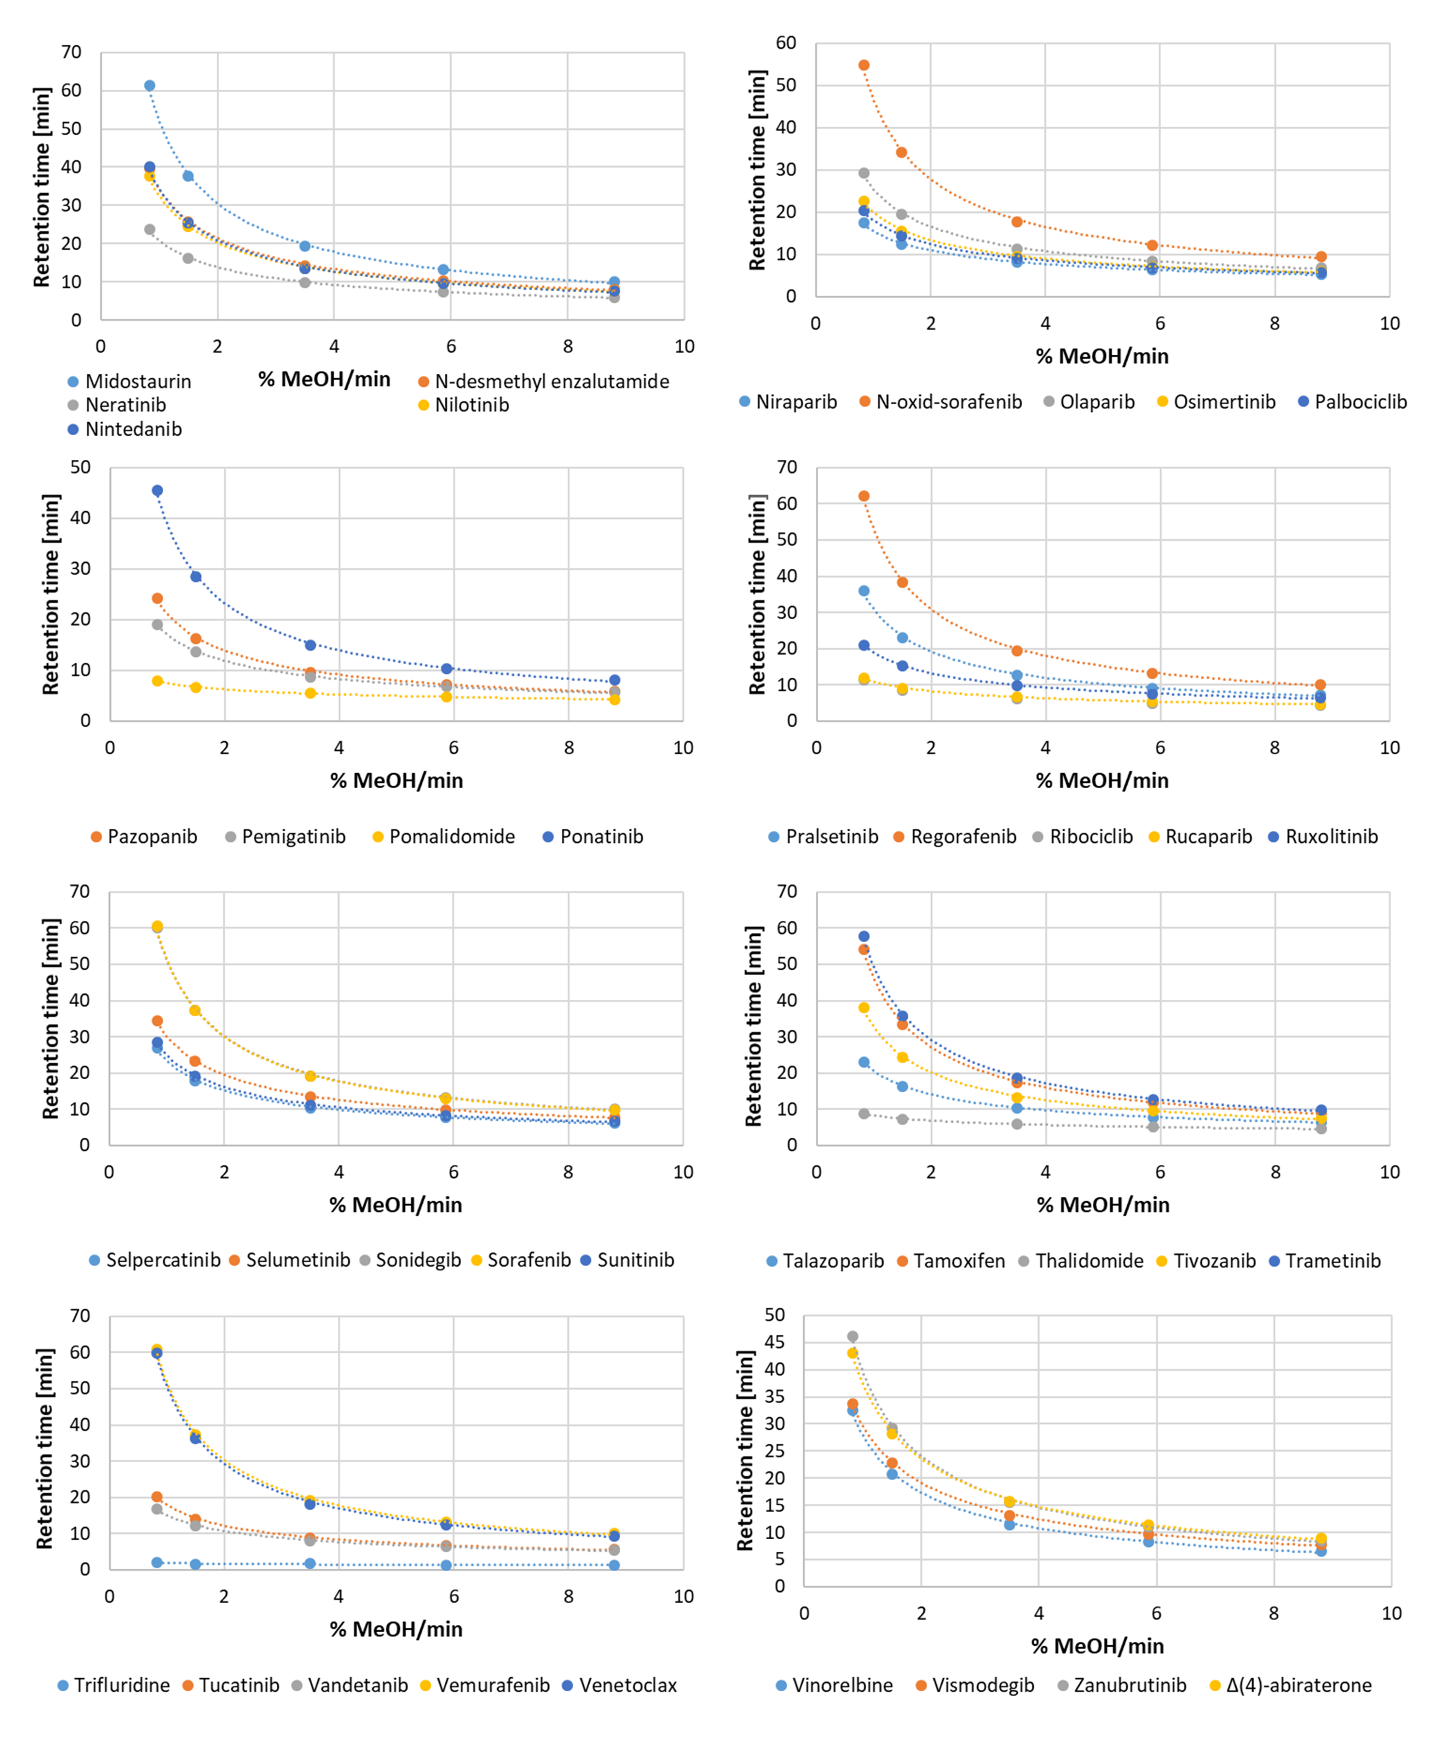
**

**Supplementary Figure 1.** Overview of the plots displaying measured retention times versus the five training gradients (% MeOH/min) for all 78 compounds.

**

**

**Supplementary Figure 2.** Response resolution plot for the subset of 14 compounds (abiraterone, apalutamide, axtinib, cabozantinib, darolutamide, entrectinib, enzalutamide, larotrectinib, lenvatinib, olaparib, pazopanib, sorafenib, sunitinib, tivozanib) indicating the number of analyte peak pairs i.e., adjacent peaks with equal retention times (RTs) at all predicted gradients (0.1-10.0% MeOH/min with 0.01% MeOH/min increments) using the regression-based approach.

**References**

1. European Medicine Ageny. ICH guideline M10 on bioanalytical method validation and study sample analysis; 2022. Available from: https://www.ema.europa.eu/en/documents/scientific-guideline/ich-guideline-m10-bioanalytical-method-validation-step-5_en.pdf [Accessed Jan 2023].

2. U.S. Food and Drug Administration (FDA). Bioanalytical method validation guidance for industry; 2018. Available from: https://www.fda.gov/files/drugs/published/Bioanalytical-Method-Validation-Guidance-for-Industry.pdf [Accessed Jan 2023].

3. Kehl N, Schlichtig K, Dürr P, Bellut L, Dörje F, Fietkau R, et al. An easily expandable multi-drug LC-MS assay for the simultaneous quantification of 57 oral antitumor drugs in human plasma. Cancers 2021;13:6329.

4. Zhang M, Liu X, Chen Z, Jiang S, Wang L, Tao M, et al. Method development and validation for simultaneous determination of six tyrosine kinase inhibitors and two active metabolites in human plasma/serum using UPLC-MS/MS for therapeutic drug monitoring. J Pharm Biomed Anal 2022;211:114562.

5. Jiang F, Peng X, Cai D, Wen D, Liu Y, Zhi M, et al. A validated LC-MS/MS method for the simultaneous determination of thalidomide and its two metabolites in human plasma: application to a pharmacokinetic assay. Biomed Chromatogr 2018;32:e4240.

6. Kiesel BF, Parise RA, Wong A, Keyvanjah K, Jacobs S, Beumer JH. LC-MS/MS assay for the quantitation of the tyrosine kinase inhibitor neratinib in human plasma. J Pharm Biomed Anal 2017;134:130-6.

7. Garrison DA, Jin Y, Uddin ME, Sparreboom A, Baker SD. Development, validation, and application of an LC-MS/MS method for the determination of the AXL/FLT3 inhibitor gilteritinib in mouse plasma. J Chromatogr B Analyt Technol Biomed Life Sci 2021;1179:122882.

8. Food and Drug Administration. Center for drug evaluation and research. Abemaciclib. Multi-discipline review; 2017. Available from: https://www.accessdata.fda.gov/drugsatfda_docs/nda/2017/208716Orig1s000MultidisciplineR.pdf [Accessed Jan 2023].

9. Mueller-Schoell A, Groenland SL, Scherf-Clavel O, van Dyk M, Huisinga W, Michelet R, et al. Therapeutic drug monitoring of oral targeted antineoplastic drugs. Eur J Clin Pharmacol 2021;77:441-64.

10. van Nuland M, Groenland SL, Bergman AM, Steeghs N, Rosing H, Venekamp N, et al. Exposure-response analyses of abiraterone and its metabolites in real-world patients with metastatic castration-resistant prostate cancer. Prostate Cancer Prostatic Dis 2020;23:244-51.

11. Food and Drug Administration. Center for drug evaluation and research. Afatinib. Clinical pharmacology and biopharmaceutics review(s); 2012. Available from: https://www.accessdata.fda.gov/drugsatfda_docs/nda/2013/201292Orig1s000ClinPharmR.pdf [Accessed Jan 2023].

12. Verheijen RB, Yu H, Schellens JHM, Beijnen JH, Steeghs N, Huitema ADR. Practical recommendations for therapeutic drug monitoring of kinase inhibitors in oncology. Clin Pharmacol Ther 2017;102:765-76.

13. Food and Drug Administration. Center for drug evaluation and research. Alectinib. Clinical Pharmacology and biopharmaceutics review(s); 2015. Available from: https://www.accessdata.fda.gov/drugsatfda_docs/nda/2015/208434Orig1s000ClinPharmR.pdf [Accessed Jan 2023].

14. Shire Pharma Canada ULC. Product monograph Agrylin®; 2019. Available from: https://pdf.hres.ca/dpd_pm/00053558.PDF [Accessed Jan 2023].

15. Ingle JN, Kalari KR, Buzdar AU, Robson ME, Goetz MP, Desta Z, et al. Estrogens and their precursors in postmenopausal women with early breast cancer receiving anastrozole. Steroids 2015;99:32-8.

16. Food and Drug Administration. Center for drug evaluation and research. Apalutamide. Multi-discipline review; 2017. Available from: https://www.accessdata.fda.gov/drugsatfda_docs/nda/2018/210951Orig1s000MultidisciplineR.pdf [Accessed Jan 2023].

17. Tsuchiya N, Igarashi R, Suzuki-Honma N, Fujiyama N, Narita S, Inoue T, et al. Association of pharmacokinetics of axitinib with treatment outcome and adverse events in advanced renal cell carcinoma patients. J Clin Oncol 2015;33:506.

18. Tyrrell CJ, Denis L, Newling D, Soloway M, Channer K, Cockshott ID. Casodex 10-200 mg daily, used as monotherapy for the treatment of patients with advanced prostate cancer. An overview of the efficacy, tolerability and pharmacokinetics from three phase II dose-ranging studies. Casodex Study Group. Eur Urol 1998;33:39–53.

19. Food and Drug Administration. Center for drug evaluation and research. Binimetinib. Multi-discipline review; 2017. Available from: https://www.accessdata.fda.gov/drugsatfda_docs/nda/2018/210498Orig1s000MultidisciplineR.pdf [Accessed Jan 2023].

20. Hsyu P-H, Mould DR, Upton RN, Amantea M. Pharmacokinetic-pharmacodynamic relationship of bosutinib in patients with chronic phase chronic myeloid leukemia. Cancer Chemother Pharmacol 2013;71:209-18.

21. Food and Drug Administration. Center for drug evaluation and research. Brigatinib. Multi-discipline review; 2016. Available from: https://www.accessdata.fda.gov/drugsatfda_docs/nda/2017/208772Orig1s000MultidisciplineR.pdf [Accessed Jan 2023].

22. Food and Drug Administration. Center for drug evaluation and research. Cabozantinib. Clinical pharmacology and biopharmaceutics review(s); 2015. Available from: https://www.accessdata.fda.gov/drugsatfda_docs/nda/2016/208692Orig1s000ClinPharmR.pdf [Accessed Jan 2023].

23. Food and Drug Administration. Center for drug evaluation and research. Ceritinib. Clinical pharmacology and biopharmaceutics review(s); 2014. Available from: https://www.accessdata.fda.gov/drugsatfda_docs/nda/2014/205755Orig1s000ClinPharmR.pdf [Accessed Jan 2023].

24. Food and Drug Administration. Center for drug evaluation and research. Cobimetinib. Clinical pharmacology and biopharmaceutics review(s); 2014. Available from: https://www.accessdata.fda.gov/drugsatfda_docs/nda/2015/206192Orig1s000ClinPharmR.pdf [Accessed Jan 2023].

25. Ou SH, Bartlett CH, Mino-Kenudson M, Cui J, Iafrate AJ. Crizotinib for the treatment of ALK-rearranged non-small cell lung cancer: a success story to usher in the second decade of molecular targeted therapy in oncology. Oncologist 2012;17:1351-75.

26. Ouellet D, Gibiansky E, Leonowens C, O'Hagan A, Haney P, Switzky J, et al. Population pharmacokinetics of dabrafenib, a BRAF inhibitor: effect of dose, time, covariates, and relationship with its metabolites. J Clin Pharmacol 2014;54:696-706.

27. Food and Drug Administration. Center for drug evaluation and research. Dacomitinib. Multi-discipline review; 2018. Available from: https://www.accessdata.fda.gov/drugsatfda_docs/nda/2018/211288Orig1s000MultidisciplineR.pdf [Accessed Jan 2023].

28. Food and Drug Administration. Center for drug evaluation and research. Darolutamide. Multi-discipline review; 2019. Available from: https://www.accessdata.fda.gov/drugsatfda_docs/nda/2019/212099Orig1s000MultidisciplineR.pdf [Accessed Jan 2023].

29. Wang X, Roy A, Hochhaus A, Kantarjian HM, Chen TT, Shah NP. Differential effects of dosing regimen on the safety and efficacy of dasatinib: retrospective exposure-response analysis of a Phase III study. Clin Pharmacol 2013;5:85-97.

30. Food and Drug Administration. Center for drug evaluation and research. Duvelisib. Multi-discipline review; 2018. Available from: https://www.accessdata.fda.gov/drugsatfda_docs/nda/2018/211155Orig1Orig2s000MultidisciplineR.pdf [Accessed Jan 2023].

31. Food and Drug Administration. Center for drug evaluation and research. Encorafenib. Multi-discipline review; 2017. Available from: https://www.accessdata.fda.gov/drugsatfda_docs/nda/2018/210496Orig1s000MultidisciplineR.pdf [Accessed Jan 2023].

32. Jager NG, Rosing H, Schellens JH, Linn SC, Beijnen JH. Tamoxifen dose and serum concentrations of tamoxifen and six of its metabolites in routine clinical outpatient care. Breast Cancer Res Treat 2014;143:477-83.

33. Food and Drug Administration. Center for drug evaluation and research. Entrectinib. Multi-discipline review; 2018. Available from: https://www.accessdata.fda.gov/drugsatfda_docs/nda/2019/212725Orig1s000,%20212726Orig1s000MultidisciplineR.pdf [Accessed Jan 2023].

34. Food and Drug Administration. Center for drug evaluation and research. Enzalutamide. Clinical pharmacology and biopharmaceutics review(s); 2012. Available from: https://www.accessdata.fda.gov/drugsatfda_docs/nda/2012/203415Orig1s000ClinPharmR.pdf [Accessed Jan 2023].

35. Lankheet NAG, Knapen LM, Schellens JHM, Beijnen JH, Steeghs N, Huitema ADR. Plasma concentrations of tyrosine kinase inhibitors imatinib, erlotinib, and sunitinib in routine clinical outpatient cancer care. Ther Drug Monit 2014;36:326-34.

36. Pardanani A, Tefferi A, Jamieson C, Gabrail NY, Lebedinsky C, Gao G, et al. A phase 2 randomized dose-ranging study of the JAK2-selective inhibitor fedratinib (SAR302503) in patients with myelofibrosis. Blood Cancer J 2015;5:e335.

37. Horak J, White J, Harris AL, Verrill M, Carmichael J, Holt A, et al. The effect of different etiologies of hepatic impairment on the pharmacokinetics of gefitinib. Cancer Chemother Pharmacol 2011;68:1485-95.

38. Food and Drug Administration. Center for drug evaluation and research. Gilteritinib. Clinical pharmacology and biopharmaceutics review(s); 2018. Available from: https://www.accessdata.fda.gov/drugsatfda_docs/nda/2018/211349Orig1s000MultidisciplineR.pdf [Accessed Jan 2023].

39. Food and Drug Administration. Center for drug evaluation and research. Glasdegib. Clinical pharmacology and biopharmaceutics review(s); 2018. Available from: https://www.accessdata.fda.gov/drugsatfda_docs/nda/2018/210656Orig1s000ClinPharmR.pdf [Accessed Jan 2023].

40. Food and Drug Administration. Center for drug evaluation and research. Dabrafenib. Clinical pharmacology and biopharmaceutics review(s); 2012. Available from: https://www.accessdata.fda.gov/drugsatfda_docs/nda/2013/202806Orig1s000ClinPharmR.pdf [Accessed Jan 2023].

41. Food and Drug Administration. Center for drug evaluation and research. Ibrutinib. Clinical pharmacology and biopharmaceutics review(s); 2013. Available from: https://www.accessdata.fda.gov/drugsatfda_docs/nda/2014/205552Orig2s000ClinPharmR.pdf [Accessed Jan 2023].

42. Ramanathan S, Jin F, Sharma S, Kearney BP. Clinical pharmacokinetic and pharmacodynamic profile of idelalisib. Clin Pharmacokinet 2015;55:33-45.

43. Farag S, Verheijen RB, Martijn Kerst J, Cats A, Huitema AD, Steeghs N. Imatinib pharmacokinetics in a large observational cohort of gastrointestinal stromal tumour patients. Clin Pharmacokinet 2017;56:287-92.

44. Yu H, Steeghs N, Nijenhuis CM, Schellens JH, Beijnen JH, Huitema AD. Practical guidelines for therapeutic drug monitoring of anticancer tyrosine kinase inhibitors: focus on the pharmacokinetic targets. Clin Pharmacokinet 2014;53:305-25.

45. European medicines agency. Larotrectinib. Assessment report; 2019. Available from: https://www.ema.europa.eu/en/documents/assessment-report/vitrakvi-epar-public-assessment-report_en.pdf [Accessed Jan 2023].

46. Blum W, Klisovic RB, Becker H, Yang X, Rozewski DM, Phelps MA, et al. Dose escalation of lenalidomide in relapsed or refractory acute leukemias. J Clin Oncol 2010;28:4919-25.

47. European medicines agency. Lenvatinib. Assessment report; 2015. Available from: https://www.ema.europa.eu/en/documents/assessment-report/lenvima-epar-public-assessment-report_en.pdf [Accessed Jan 2023].

48. Desta Z, Kreutz Y, Nguyen AT, Li L, Skaar T, Kamdem LK, et al. Plasma letrozole concentrations in postmenopausal women with breast cancer are associated with CYP2A6 genetic variants, body mass index, and age. Clin Pharmacol Ther 2011;90:693-700.

49. Food and Drug Administration. Center for drug evaluation and research. Lorlatinib. Multi-discipline review; 2017. Available from: https://www.accessdata.fda.gov/drugsatfda_docs/nda/2018/210868Orig1s000MultidisciplineR.pdf [Accessed Jan 2023].

50. European medicines agency. Midostaurin. Assessment report; 2017. Available from: https://www.ema.europa.eu/en/documents/assessment-report/rydapt-epar-public-assessment-report_en.pdf [Accessed Jan 2023].

51. Joulia ML, Carton E, Jouinot A, Allard M, Huillard O, Khoudour N, et al. Pharmacokinetic/pharmacodynamic relationship of enzalutamide and its active metabolite N-desmethyl enzalutamide in metastatic castration-resistant prostate cancer patients. Clin Genitourin Cancer 2020;18:155-60.

52. Food and Drug Administration. Center for drug evaluation and research. Neratinib. Multi-discipline review; 2016. Available from: https://www.accessdata.fda.gov/drugsatfda_docs/nda/2017/208051Orig1s000MultidisciplineR.pdf [Accessed Jan 2023].

53. Giles FJ, Yin OQ, Sallas WM, le Coutre PD, Woodman RC, Ottmann OG, et al. Nilotinib population pharmacokinetics and exposure-response analysis in patients with imatinib-resistant or -intolerant chronic myeloid leukemia. Eur J Clin Pharmacol 2013;69:813-23.

54. Food and Drug Administration. Center for drug evaluation and research. Nintedanib. Clinical pharmacology and biopharmaceutics review(s); 2014. Available from: https://www.accessdata.fda.gov/drugsatfda_docs/nda/2014/205832Orig1s000ClinPharmR.pdf [Accessed Jan 2023].

55. Food and Drug Administration. Center for drug evaluation and research. Niraparib. Multi-discipline review; 2016. Available from: https://www.accessdata.fda.gov/drugsatfda_docs/nda/2017/208447Orig1s000MultidisciplineR.pdf [Accessed Jan 2023].

56. Diaz-Gonzalez A, Sapena V, Boix L, Brunet M, Torres F, N LL, et al. Pharmacokinetics and pharmacogenetics of sorafenib in patients with hepatocellular carcinoma: Implications for combination trials. Liver Int 2020;40:2476-88.

57. Zhou D, Li J, Bui K, Learoyd M, Berges A, Milenkova T, et al. Bridging olaparib capsule and tablet formulations using population pharmacokinetic meta-analysis in oncology patients. Clin Pharmacokinet 2019;58:615-25.

58. Food and Drug Administration. Center for drug evaluation and research. Osimertinib. Clinical pharmacology and biopharmaceutics review(s); 2015. Available from: https://www.accessdata.fda.gov/drugsatfda_docs/nda/2015/208065Orig1s000ClinPharmR.pdf [Accessed Jan 2023].

59. Food and Drug Administration. Center for drug evaluation and research. Palbociclib. Clinical pharmacology and biopharmaceutics review(s); 2014. Available from: https://www.accessdata.fda.gov/drugsatfda_docs/nda/2015/207103Orig1s000ClinPharmR.pdf [Accessed Jan 2023].

60. Verheijen RB, Bins S, Mathijssen RH, Lolkema MP, van Doorn L, Schellens JH, et al. Individualized pazopanib dosing: a prospective feasibility study in cancer patients. Clin Cancer Res 2016;22:5738-46.

61. Subbiah V, Iannotti NO, Gutierrez M, Smith DC, Feliz L, Lihou CF, et al. FIGHT-101, a first-in-human study of potent and selective FGFR 1-3 inhibitor pemigatinib in pan-cancer patients with FGF/FGFR alterations and advanced malignancies. Ann Oncol 2022;33:522-33.

62. Li Y, Kassir N, Wang X, Palmisano M, Zhou S. Population pharmacokinetics and exposure response analysis of pomalidomide in subjects with relapsed or refractory multiple myeloma from the novel combination treatment of pomalidomide, bortezomib, and low-dose dexamethasone. J Clin Pharmacol 2020;60:1061-75.

63. Food and Drug Administration. Center for drug evaluation and research. Ponatinib. Clinical pharmacology and biopharmaceutics review(s); 2012. Available from: https://www.accessdata.fda.gov/drugsatfda_docs/nda/2012/203469Orig1s000ClinPharmR.pdf [Accessed Jan 2023].

64. Food and Drug Administration. Center for drug evaluation and research. Pralsetinib. Multi-discipline review; 2020. Available from: https://www.accessdata.fda.gov/drugsatfda_docs/nda/2020/213721Orig1s000MultidisciplineR.pdf [Accessed Jan 2023].

65. Food and Drug Administration. Center for drug evaluation and research. Regorafenib. Clinical pharmacology and biopharmaceutics review(s); 2012. Available from: https://www.accessdata.fda.gov/drugsatfda_docs/nda/2012/203085Orig1s000ClinPharmR.pdf [Accessed Jan 2023].

66. Food and Drug Administration. Center for drug evaluation and research. Ribociclib. Multi-discipline review; 2017. Available from: https://www.accessdata.fda.gov/drugsatfda_docs/nda/2017/209092Orig1s000MultidisciplineR.pdf [Accessed Jan 2023].

67. Food and Drug Administration. Center for drug evaluation and research. Rucaparib. Multi-discipline review; 2016. Available from: https://www.accessdata.fda.gov/drugsatfda_docs/nda/2016/209115Orig1s000MultiDisciplineR.pdf [Accessed Jan 2023].

68. Food and Drug Administration. Center for drug evaluation and research. Ruxolitinib. Clinical pharmacology and biopharmaceutics review(s); 2011. Available from: https://www.accessdata.fda.gov/drugsatfda_docs/nda/2011/202192Orig1s000ClinPharmR.pdf [Accessed Jan 2023].

69. Food and Drug Administration. Center for drug evaluation and research. Selpercatinib. Multi-discipline review; 2019. Available from: https://www.accessdata.fda.gov/drugsatfda_docs/nda/2020/213246Orig1s000MultidisciplineR.pdf [Accessed Jan 2023].

70. Schalkwijk S, Zhou L, Cohen-Rabbie S, Jain L, Freshwater T, So K, et al. Population pharmacokinetics and exposure-response of selumetinib and its N-desmethyl metabolite in pediatric patients with neurofibromatosis type 1 and inoperable plexiform neurofibromas. Cancer Chemother Pharmacol 2021;88:189-202.

71. Food and Drug Administration. Center for drug evaluation and research. Sonidegib. Clinical pharmacology and biopharmaceutics review(s); 2014. Available from: https://www.accessdata.fda.gov/drugsatfda_docs/nda/2015/205266Orig1s000ClinPharmR.pdf [Accessed Jan 2023].

72. Minami H, Kawada K, Ebi H, Kitagawa K, Kim Y-I, Araki K, et al. Phase I and pharmacokinetic study of sorafenib, an oral multikinase inhibitor, in japanese patients with advanced refractory solid tumors. Cancer Sci 2008;99:1492-8.

73. European medicines agency. Talazoparib. Assessment report; 2019. Available from: https://www.ema.europa.eu/en/documents/assessment-report/talzenna-epar-public-assessment-report_en.pdf [Accessed Jan 2023].

74. Teo SK, Colburn WA, Tracewell WG, Kook KA, Stirling DI, Jaworsky MS, et al. Clinical pharmacokinetics of thalidomide. Clin Pharmacokinet 2004;43:311-27.

75. Fishman MN, Srinivas S, Hauke RJ, Amato RJ, Esteves B, Cotreau MM, et al. Phase Ib study of tivozanib (AV-951) in combination with temsirolimus in patients with renal cell carcinoma. Eur J Cancer 2013;49:2841-50.

76. Food and Drug Administration. Center for drug evaluation and research. Trametinib. Clinical pharmacology and biopharmaceutics review(s); 2013. Available from: https://www.accessdata.fda.gov/drugsatfda_docs/nda/2013/204114Orig1s000ClinPharmR.pdf [Accessed Jan 2023].

77. Food and Drug Administration. Center for drug evaluation and research. Trifluridine. Pharmacology review(s); 2015. Available from: https://www.accessdata.fda.gov/drugsatfda_docs/nda/2015/207981Orig1s000PharmR.pdf [Accessed Jan 2023].

78. Borges VF, Ferrario C, Aucoin N, Falkson C, Khan Q, Krop I, et al. Tucatinib combined with ado-trastuzumab emtansine in advanced ERBB2/HER2-positive metastatic breast cancer: a phase 1b clinical trial. JAMA Oncol 2018;4:1214-20.

79. Food and Drug Administration. Center for drug evaluation and research. Vandetanib. Clinical pharmacology and biopharmaceutics review(s); 2010. Available from: https://www.accessdata.fda.gov/drugsatfda_docs/nda/2011/022405Orig1s000ClinPharmR.pdf [Accessed Jan 2023].

80. Food and Drug Administration. Center for drug evaluation and research. Vemurafenib. Clinical pharmacology and biopharmaceutics review(s); 2011. Available from: https://www.accessdata.fda.gov/drugsatfda_docs/nda/2011/202429Orig1s000ClinPharmR.pdf [Accessed Jan 2023].

81. Reda G, Cassin R, Dovrtelova G, Matteo C, Giannotta J, D'Incalci M, et al. Venetoclax penetrates in cerebrospinal fluid and may be effective in chronic lymphocytic leukemia with central nervous system involvement. Haematologica 2019;104:e222-e3.

82. Corona G, Gusella M, Gaspardo A, Miolo G, Bertolaso L, Pezzolo E, et al. Rapid LC-MS/MS method for quantification of vinorelbine and 4-O-deacetylvinorelbine in human whole blood suitable to monitoring oral metronomic anticancer therapy. Biomed Chromatogr 2018e4282.

83. Food and Drug Administration. Center for drug evaluation and research. Vismodegib. Clinical pharmacology and biopharmaceutics review(s); 2012. Available from: https://www.accessdata.fda.gov/drugsatfda_docs/nda/2012/203388Orig1s000ClinPharmR.pdf [Accessed Jan 2023].

84. Food and Drug Administration. Center for drug evaluation and research. Zanubrutinib. Multi-discipline review; 2019. Available from: https://www.accessdata.fda.gov/drugsatfda_docs/nda/2019/213217Orig1s000MultidisciplineR.pdf [Accessed Jan 2023].

85. Blanchet B, Carton E, Alyamani M, Golmard L, Huillard O, Thomas-Scheomann A, et al. A PK/PD study of Delta-4 abiraterone metabolite in metastatic castration-resistant prostate cancer patients. Pharmacol Res 2018;136:56-61.
